# Supplementary material for: Monomolecular pyrenol-derivatives as multi-emissive probes for orthogonal reactivities
Source: Royal Society of Chemistry journal article supplement (doi:10.1039/c6pp00290k), 2016-10-28
Supplement: c6pp00290k1.pdf [file c6pp00290k1.pdf]

# Electronic Supplementary Information (ESI)

## Monomolecular Pyrenol-Derivatives as Multi-Emissive Probes for Orthogonal Reactivities

Björn Finkler<sup>[a]</sup>, Iris Riemann<sup>[b]</sup>, Michael Vester<sup>[a]</sup>, Andreas Grüter<sup>[a]</sup>, Frank Stracke<sup>[b]</sup>, Gregor Jung<sup>[a]\*</sup>

[a] Biophysical Chemistry, Saarland University, Campus B2 2, 66123 Saarbrücken, Germany.

[b] Fraunhofer-IBMT, Ensheimer Straße 48, 66386 St. Ingbert, Germany.

### Table of contents

|                                                                            |     |
|----------------------------------------------------------------------------|-----|
| Experimental Details .....                                                 | S1  |
| NMR Spectra.....                                                           | S1  |
| Crystallographic data.....                                                 | S17 |
| Mass spectra .....                                                         | S21 |
| Fluorescence spectra .....                                                 | S26 |
| Time-resolved fluorescence spectra .....                                   | S28 |
| pK <sub>a</sub> determination with absorption/fluorescence titration ..... | S30 |
| pK <sub>a</sub> determination with FCS.....                                | S37 |
| Photostability.....                                                        | S38 |
| Enzyme Kinetics .....                                                      | S39 |
| <i>Live Cell</i> application.....                                          | S45 |
| Molecular logic .....                                                      | S48 |
| Compound 1 .....                                                           | S48 |
| Compound 4 .....                                                           | S63 |
| Supporting References .....                                                | S75 |

## Experimental Details

### NMR Spectra

Compound **5** in acetone-d<sub>6</sub>

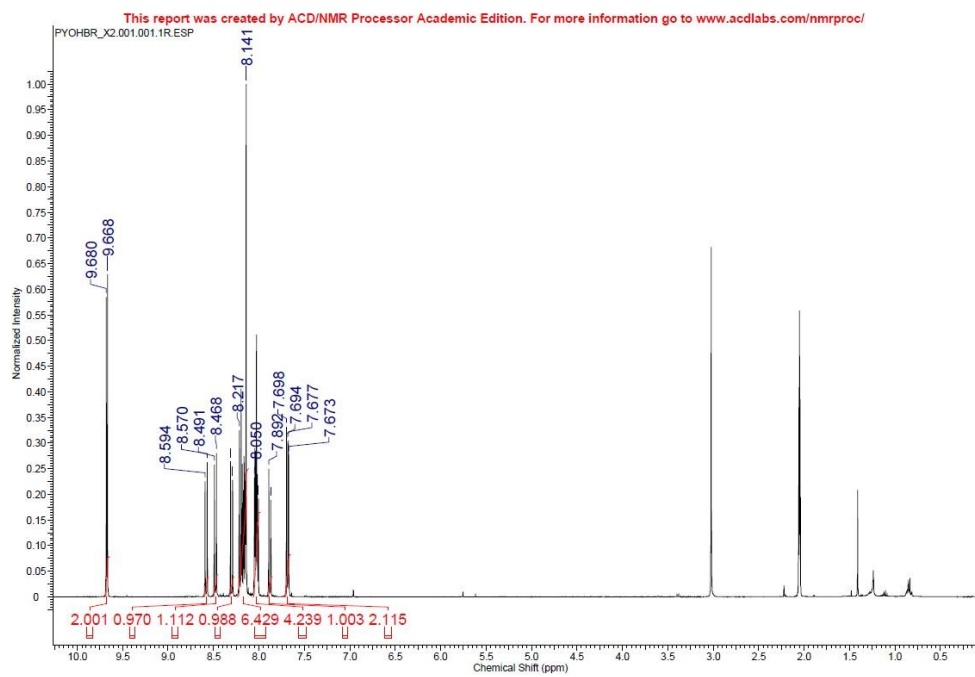

Figure S1: <sup>1</sup>H-NMR of compound **5**.

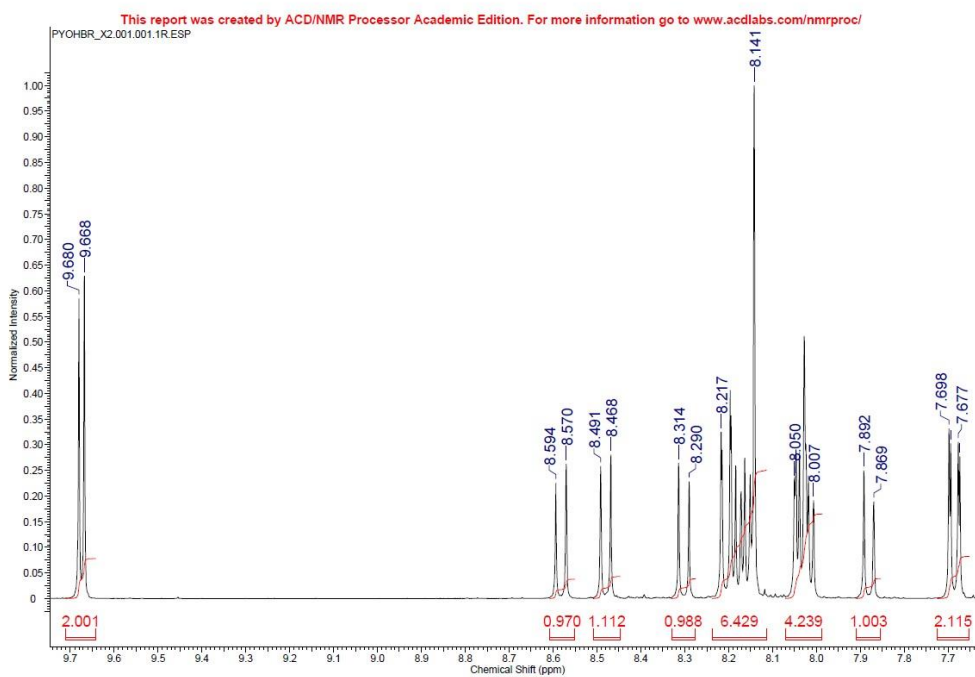

Figure S2: <sup>1</sup>H-NMR of compound **5**.

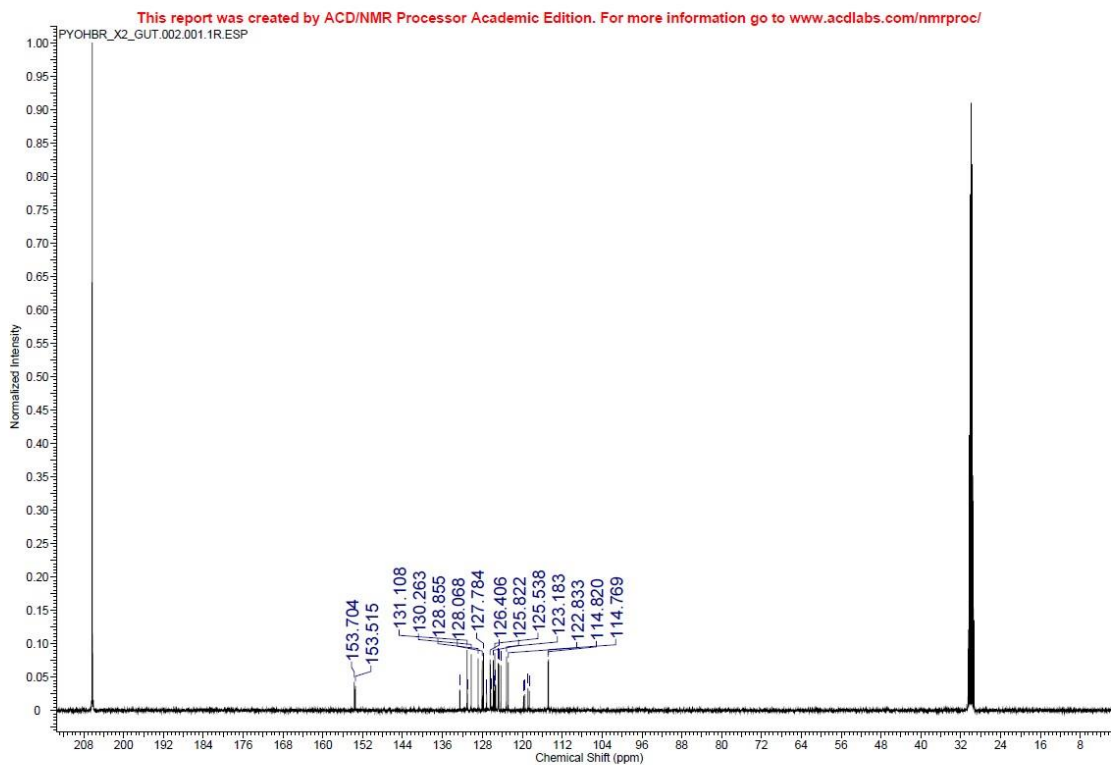

Figure S3:  $^{13}\text{C}$ -NMR of compound **5**.

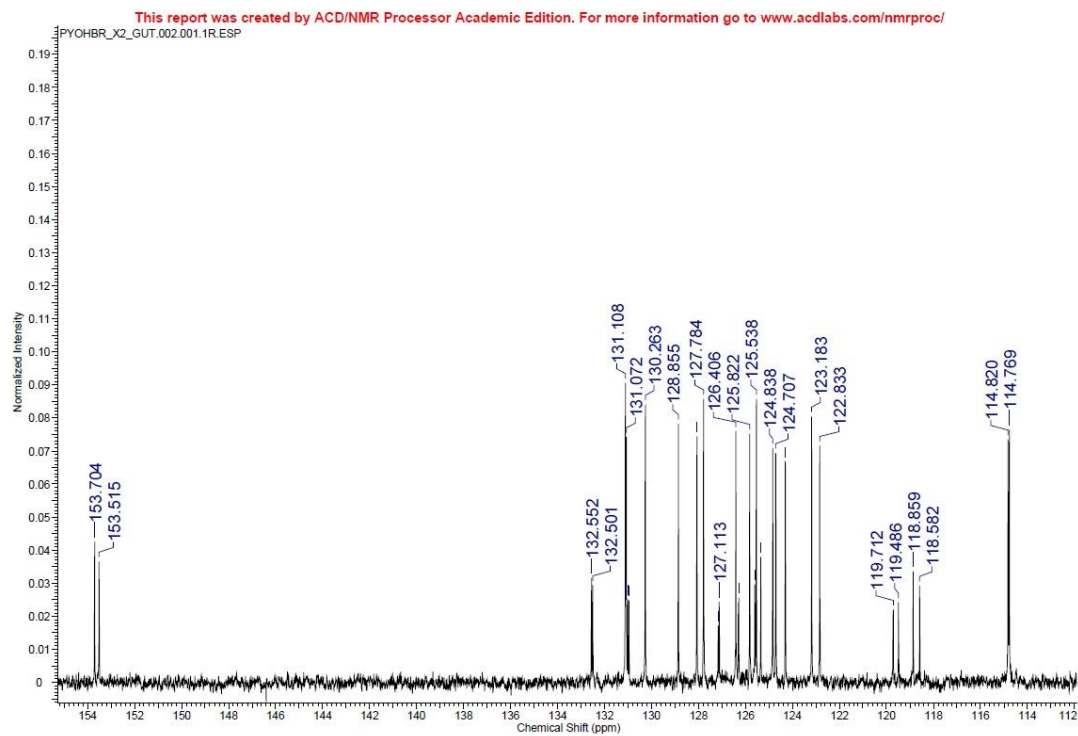

Figure S4:  $^{13}\text{C}$ -NMR of compound **5**.

Compound 6 in acetone-d<sub>6</sub>

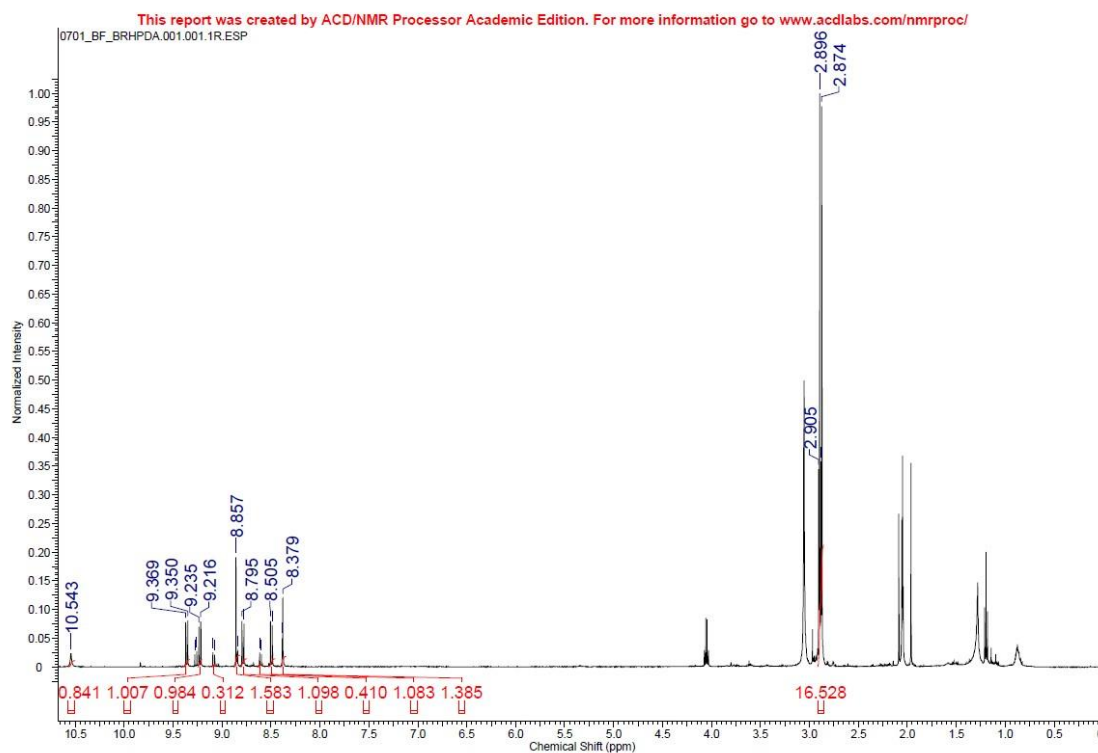

Figure S5: <sup>1</sup>H-NMR of compound 6.

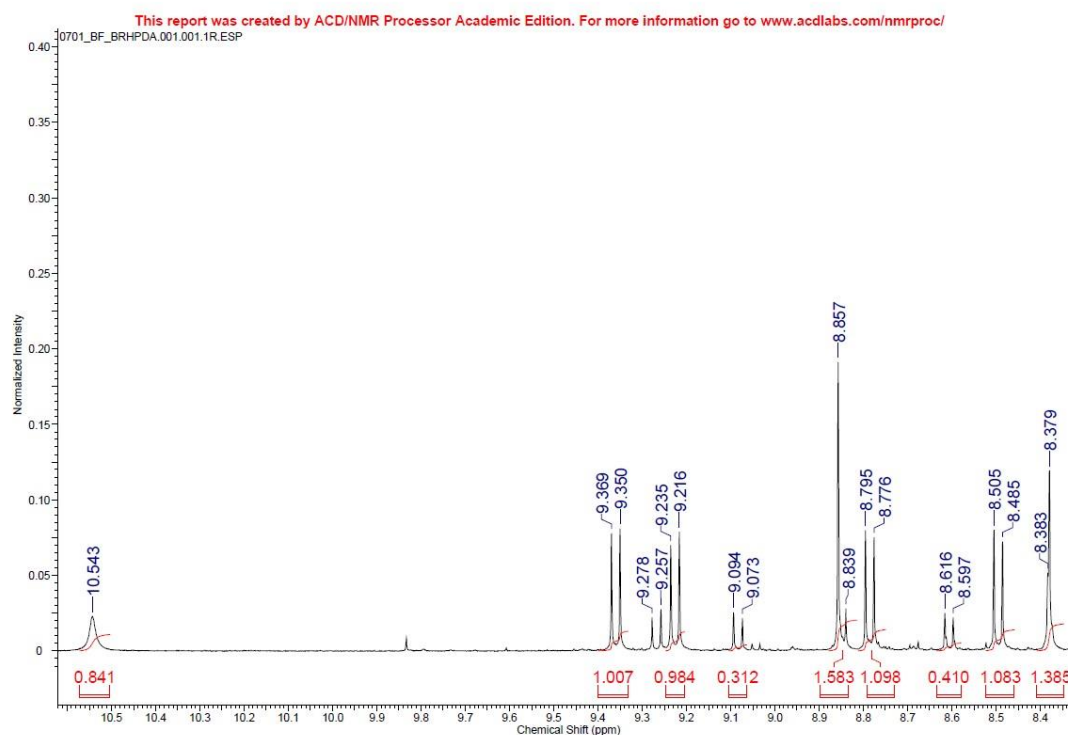

Figure S6: <sup>1</sup>H-NMR of compound 6.

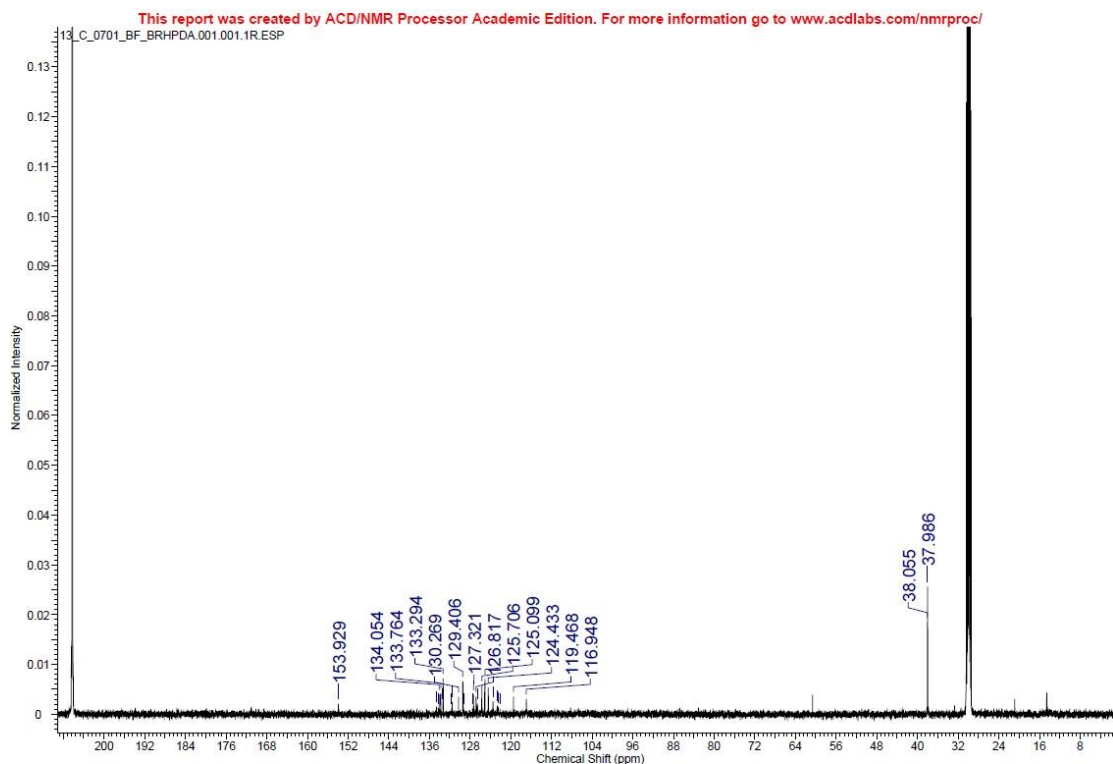

Figure S7: <sup>13</sup>C-NMR of compound **6**.

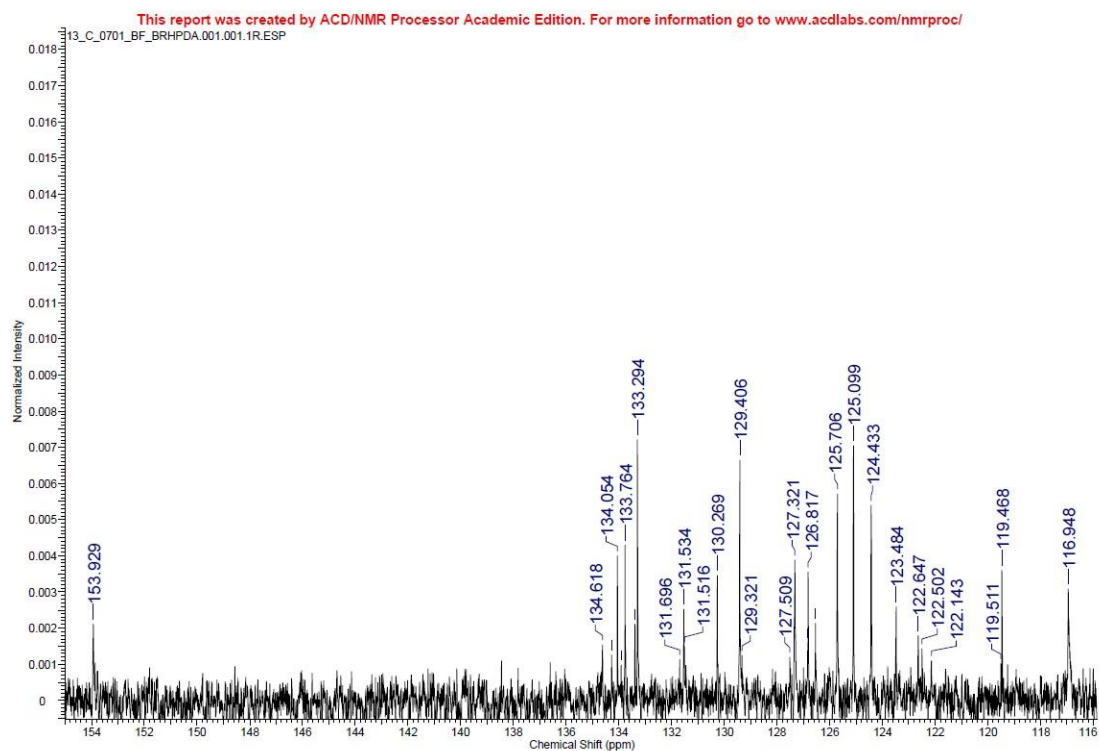

Figure S8: <sup>13</sup>C-NMR of compound **6**.

Compound 7 in chloroform-d

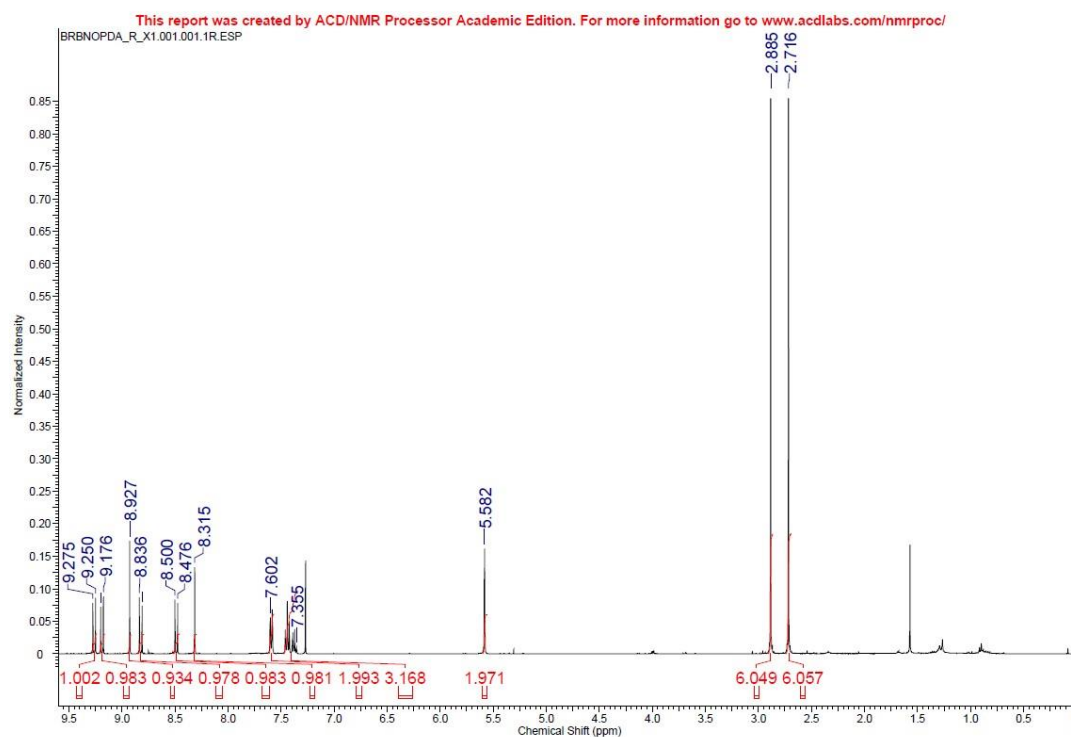

Figure S9:  $^1\text{H}$ -NMR of compound **7**.

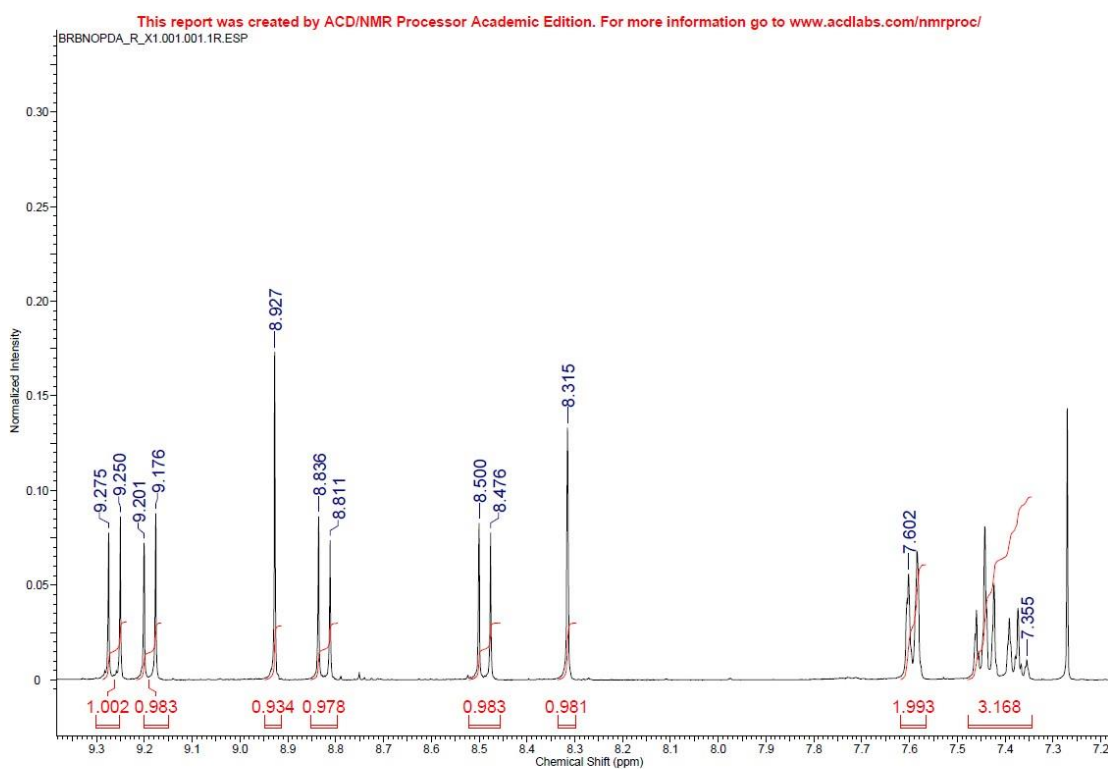

Figure S10:  $^1\text{H}$ -NMR of compound **7**.

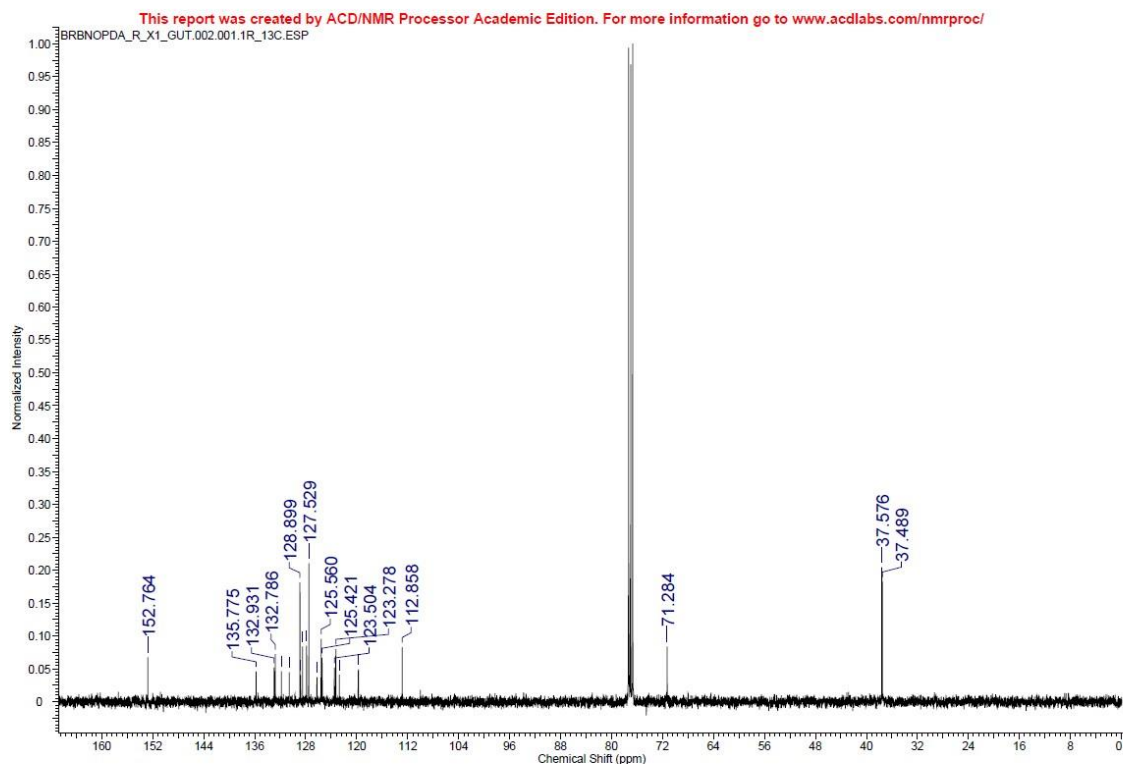

Figure S11:  $^{13}\text{C}$ -NMR of compound **7**.

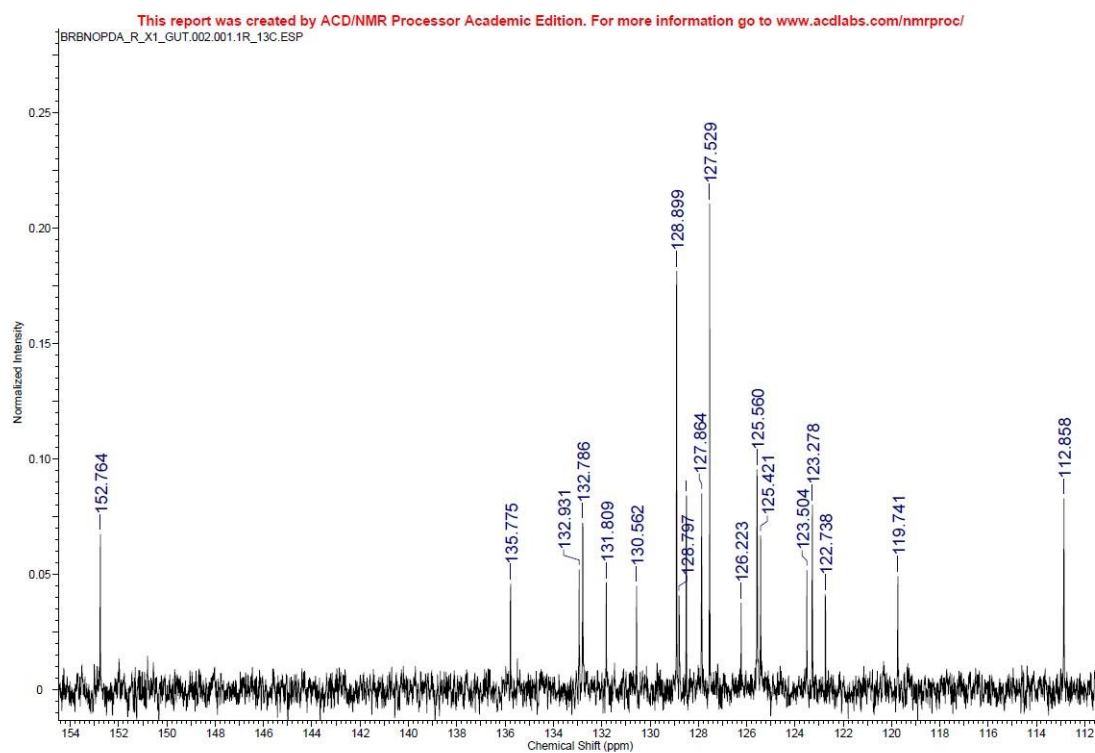

Figure S12:  $^{13}\text{C}$ -NMR of compound **7**.

Compound 8 in chloroform-d

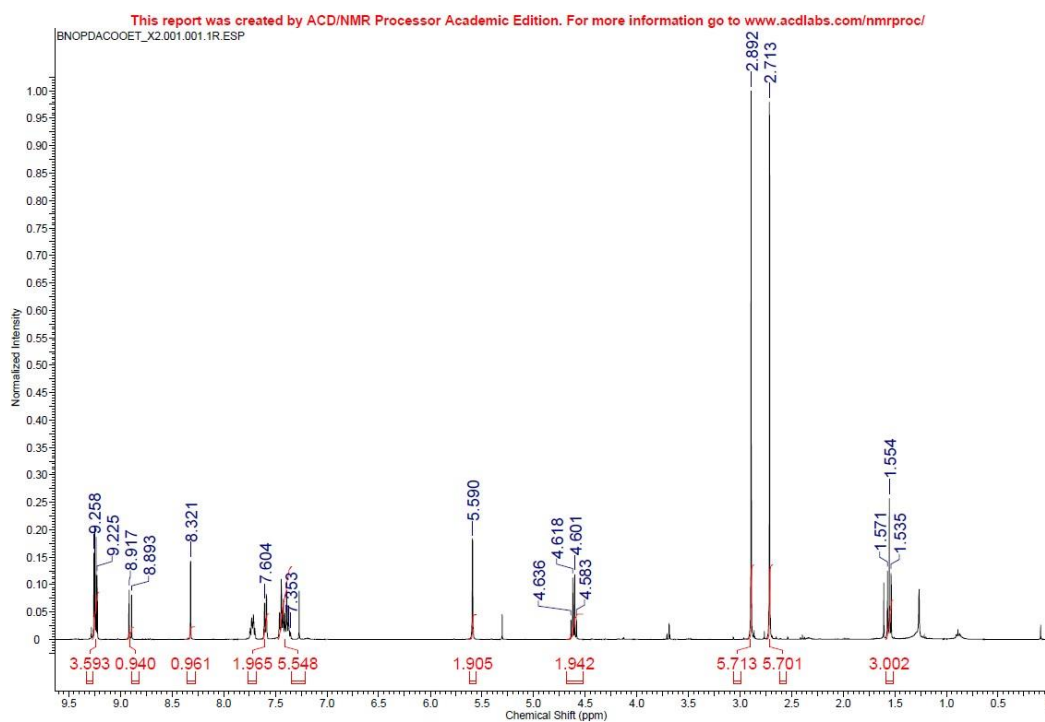

Figure S13:  $^1\text{H}$ -NMR of compound 8.

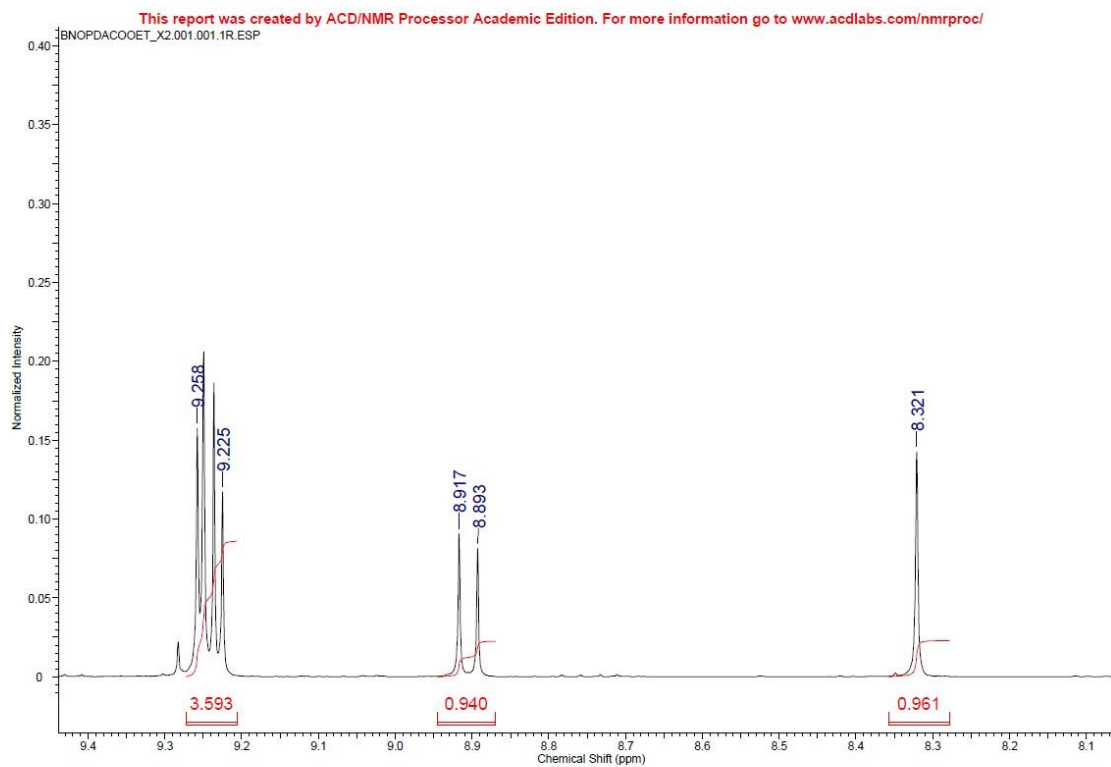

Figure S14:  $^1\text{H}$ -NMR of compound 8.



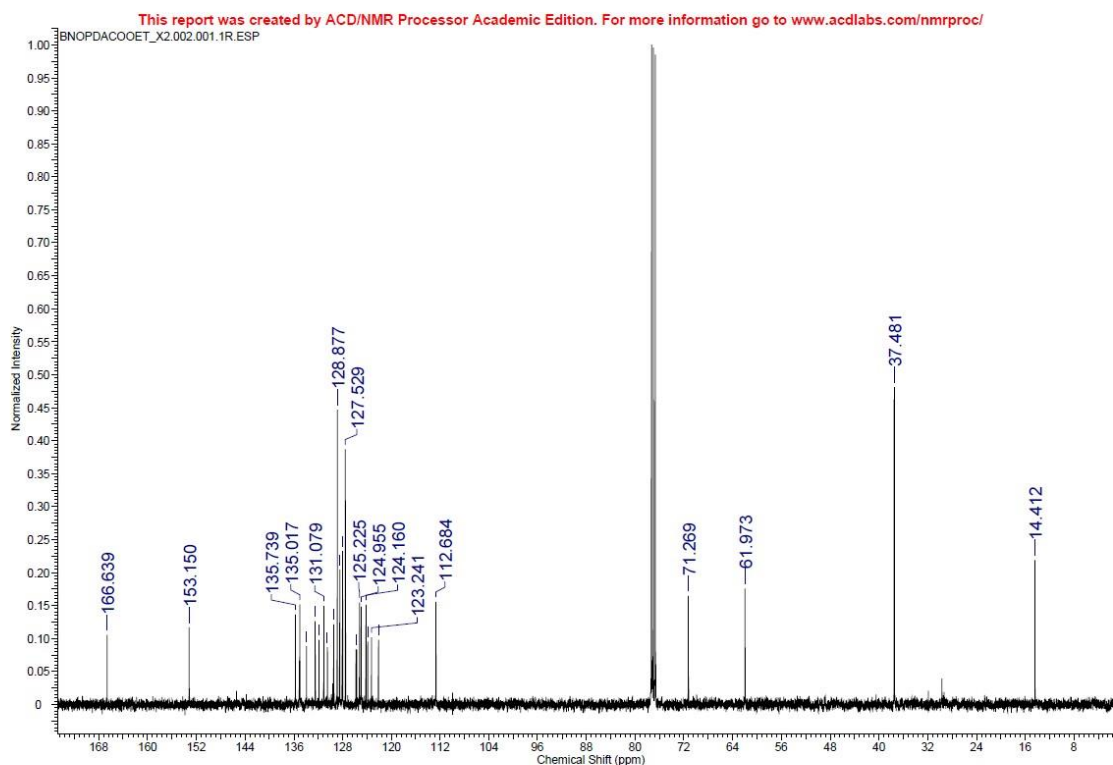

Figure S15:  $^{13}\text{C}$ -NMR of compound **8**.

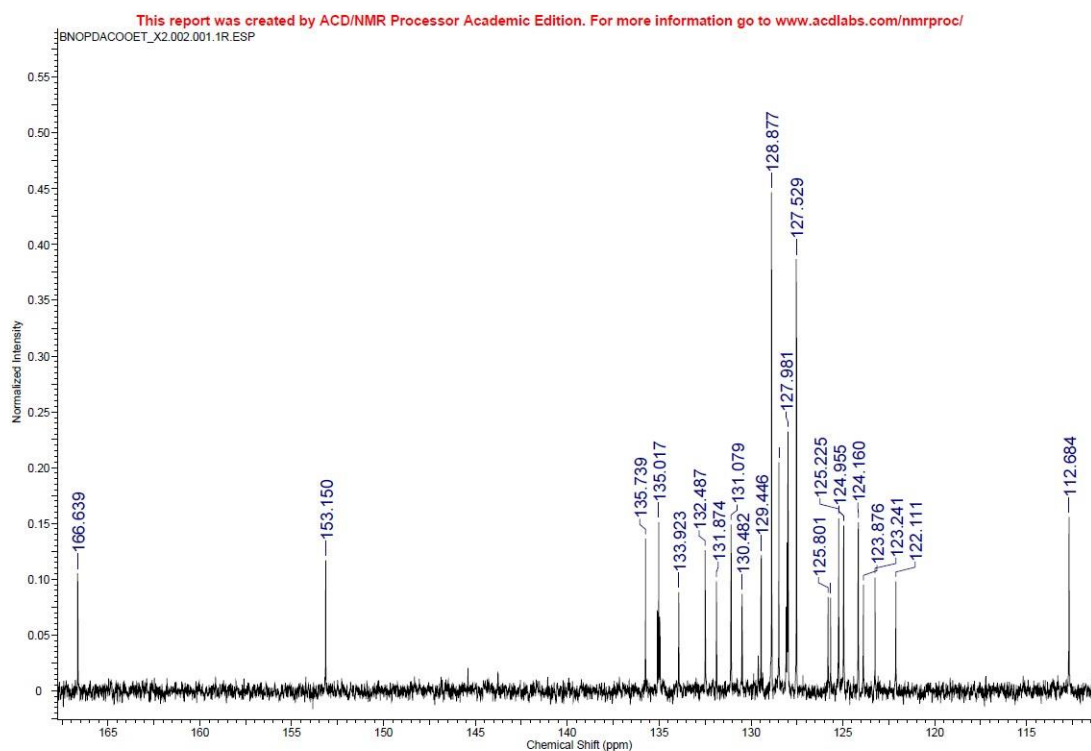

Figure S16:  $^{13}\text{C}$ -NMR of compound **8**.

Compound 2 in acetone-d<sub>6</sub>

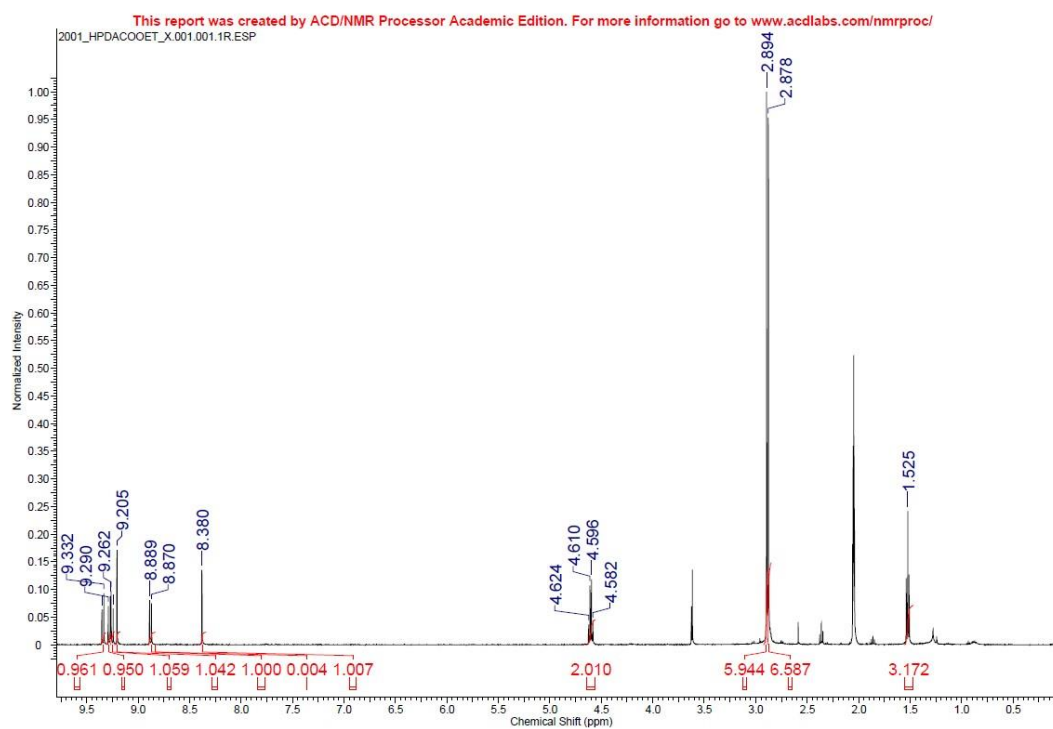

Figure S17: <sup>1</sup>H-NMR of compound 2.

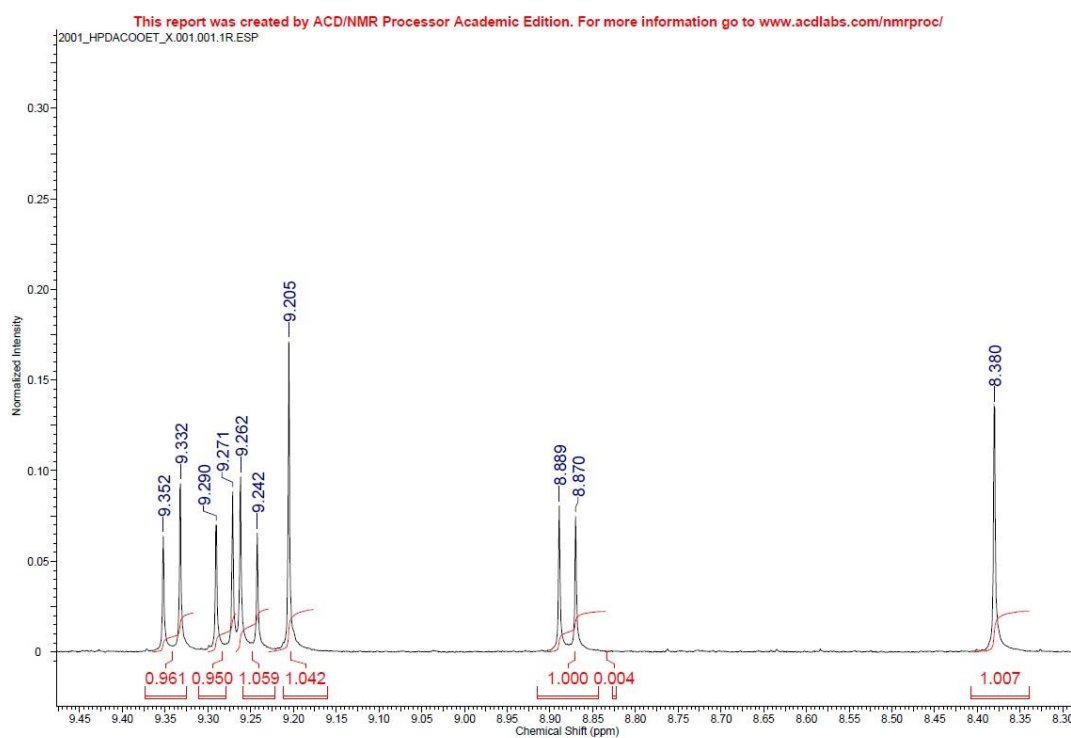

Figure S18: <sup>1</sup>H-NMR of compound 2.

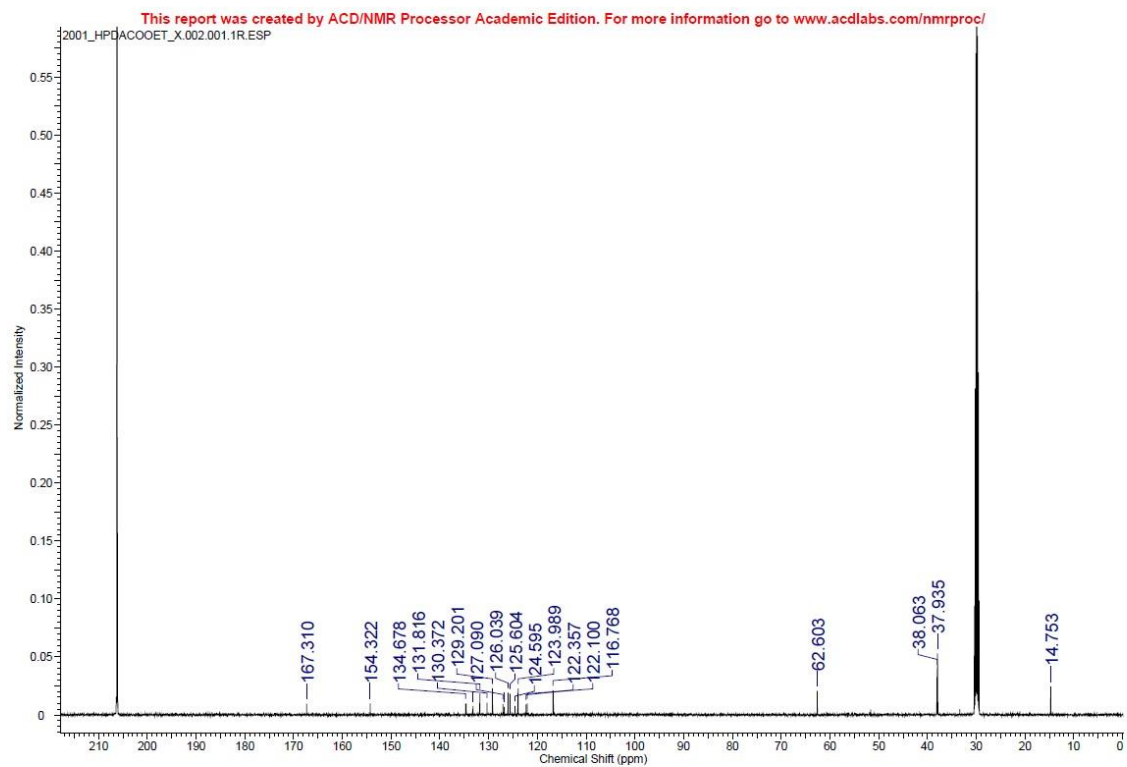

Figure S19:  $^{13}\text{C}$ -NMR of compound **2**.

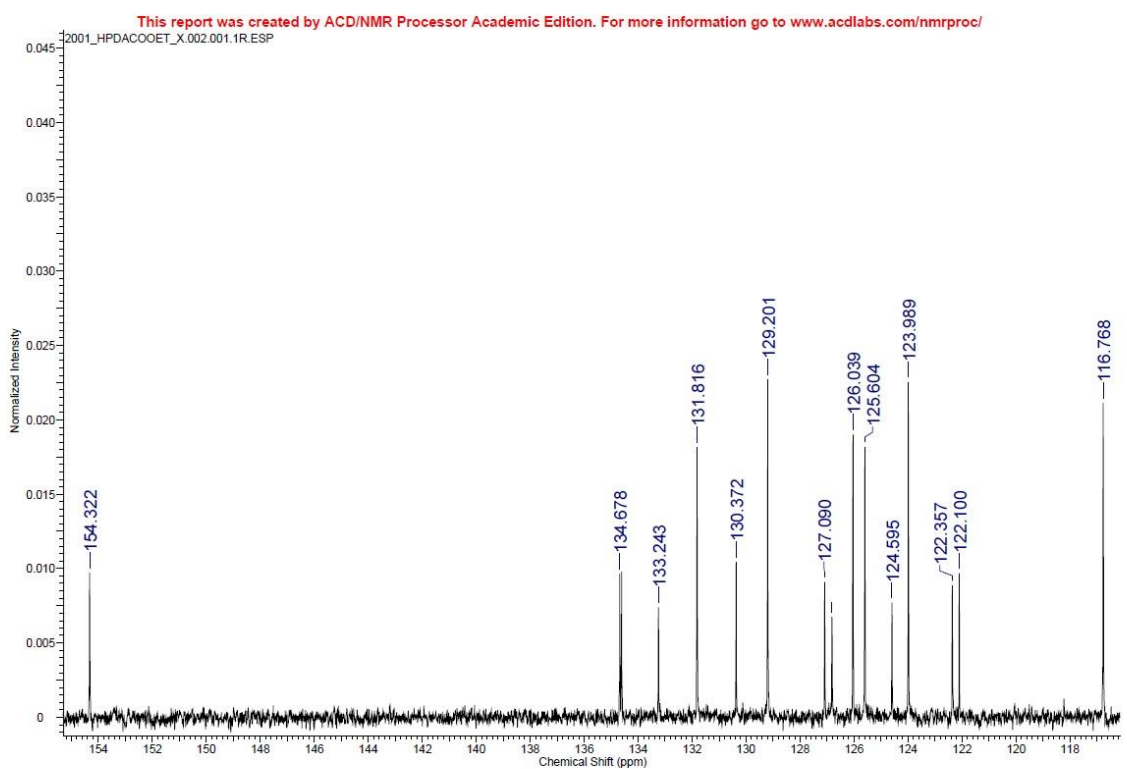

Figure S20:  $^{13}\text{C}$ -NMR of compound **2**.

Compound 4 in acetone-d<sub>6</sub>

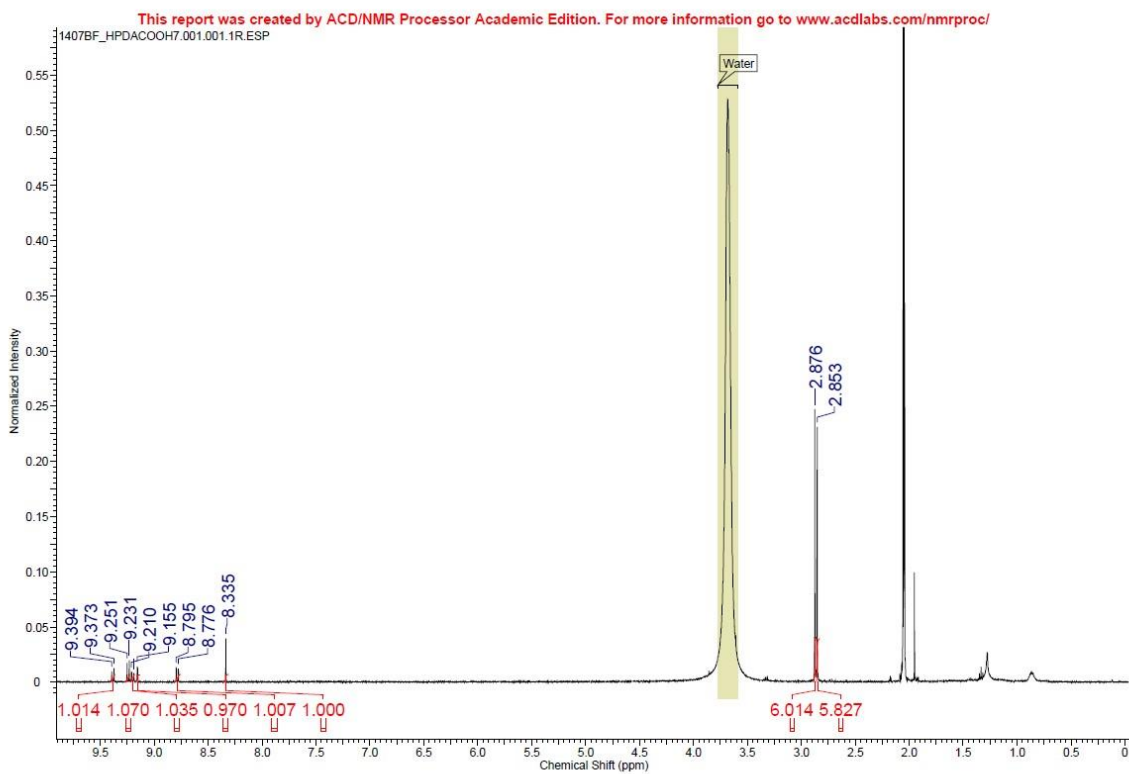

Figure S21: <sup>1</sup>H-NMR of compound 4.

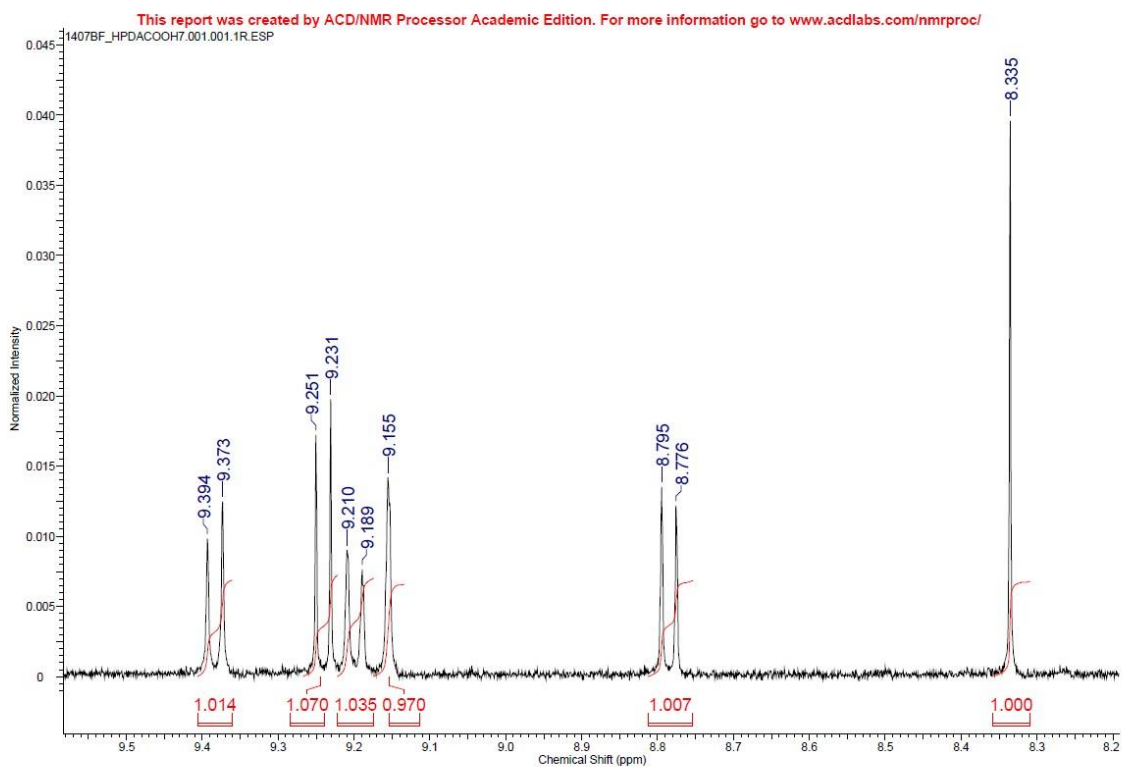

Figure S22: <sup>1</sup>H-NMR of compound 4.

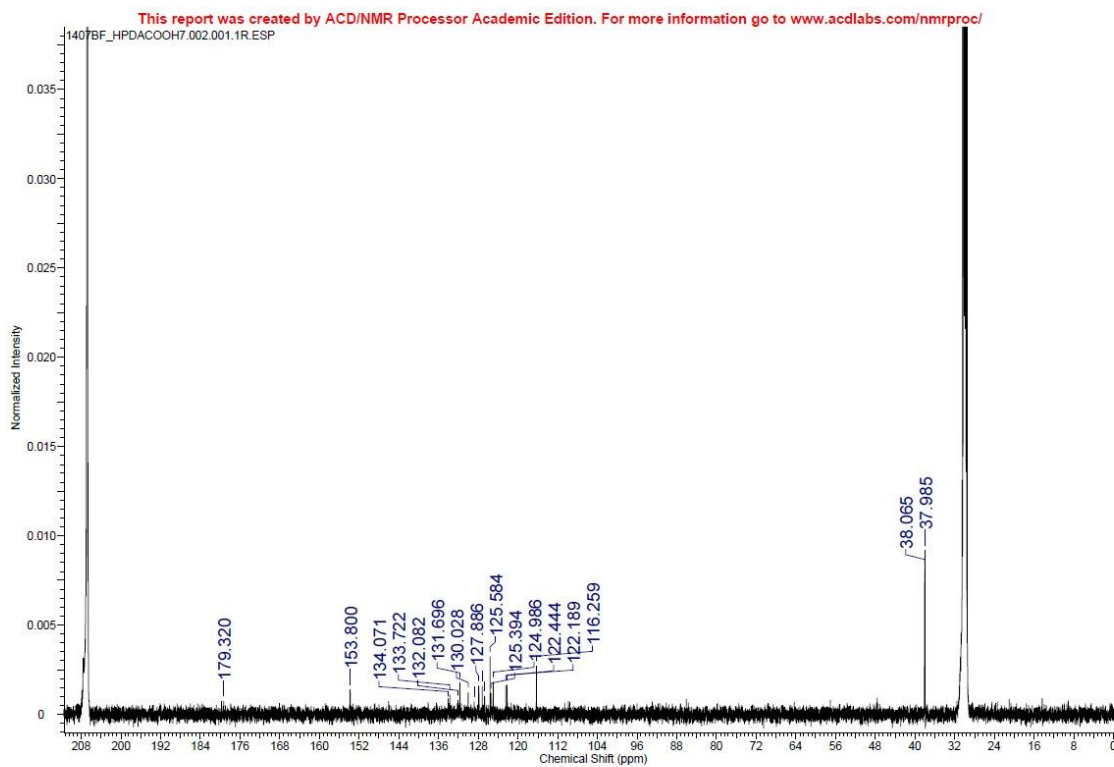

Figure S23:  $^{13}\text{C}$ -NMR of compound **4**.

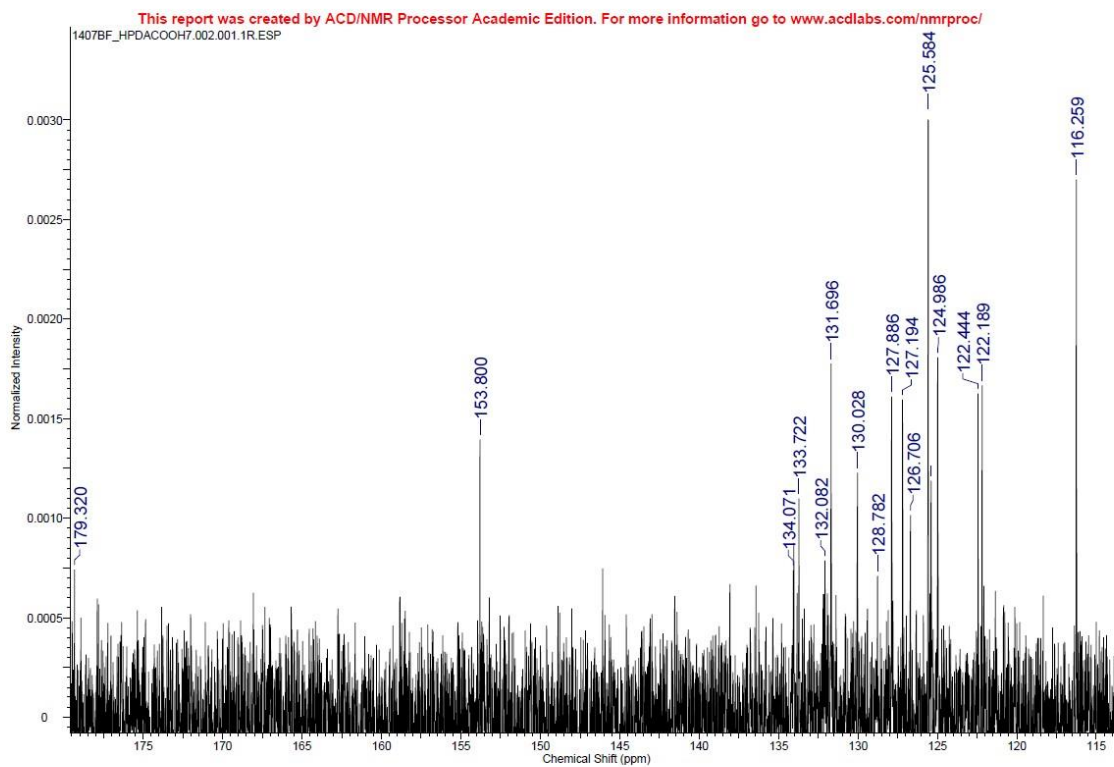

Figure S24:  $^{13}\text{C}$ -NMR of compound **4**.

Compound 1 in methanol d4

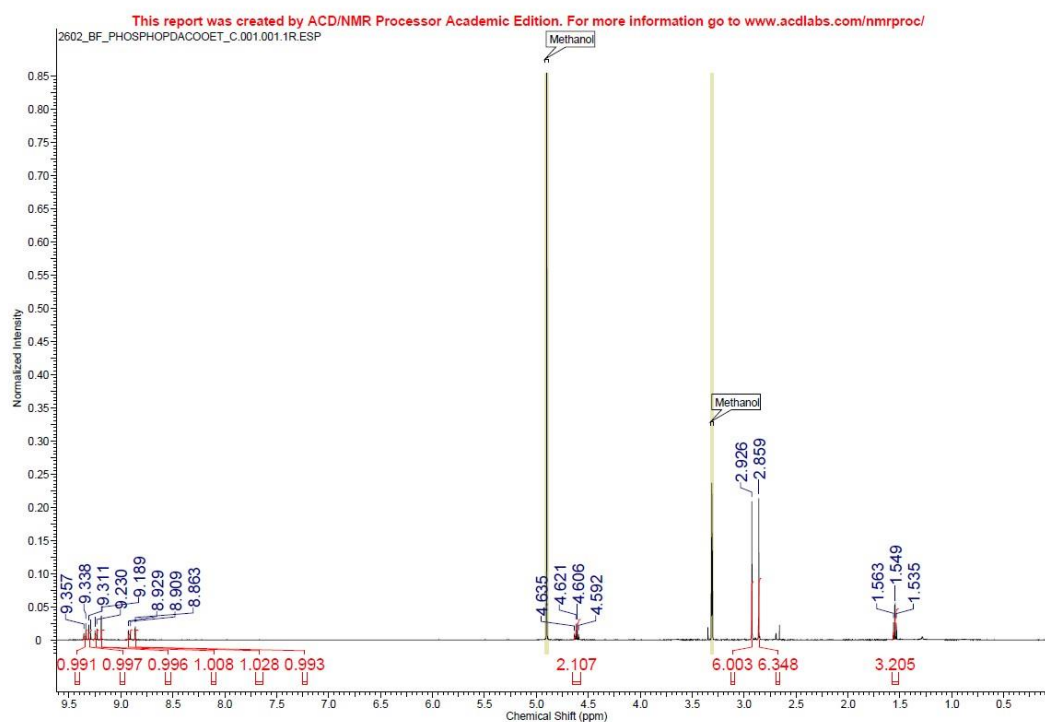

Figure S25:  $^1\text{H}$ -NMR of compound **1**.

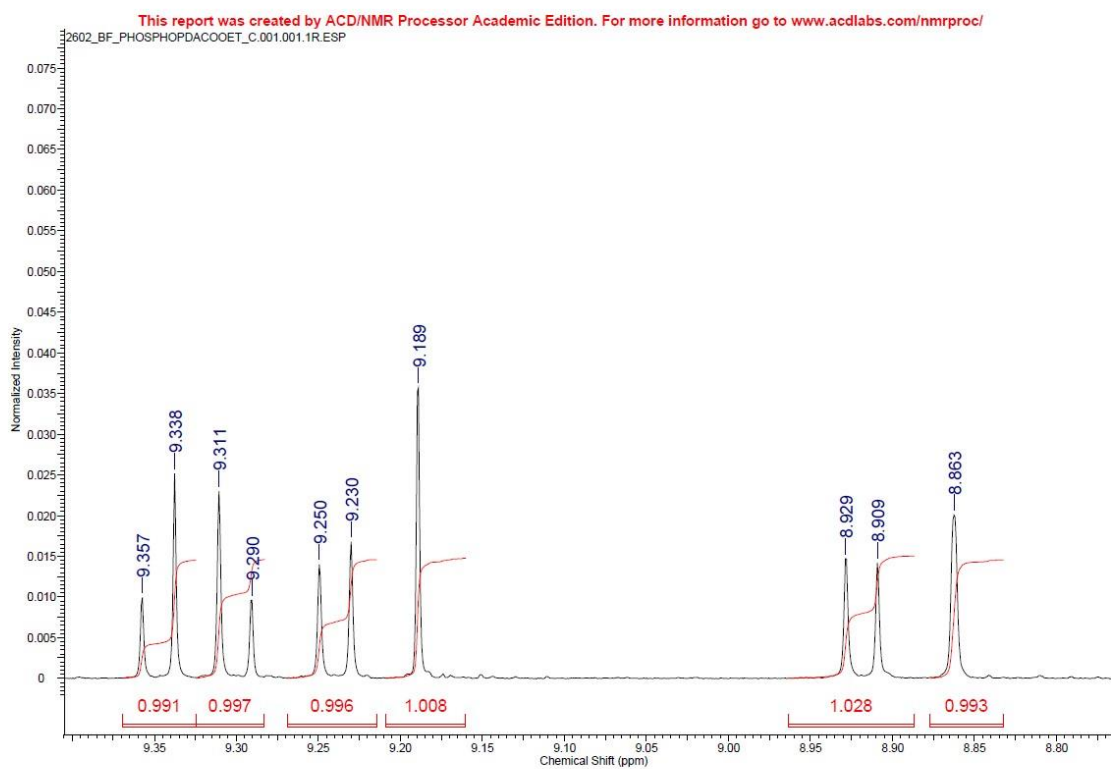

Figure S26:  $^1\text{H}$ -NMR of compound **1**.

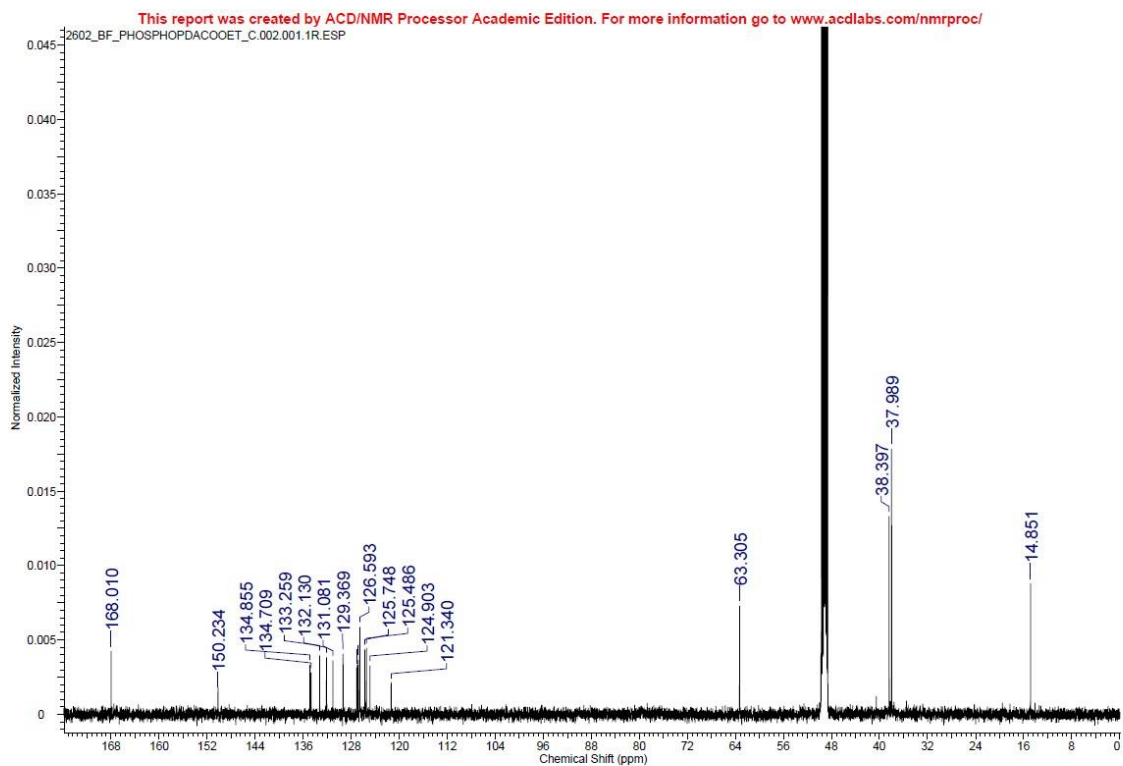

Figure S27:  $^{13}\text{C}$ -NMR of compound **1**.

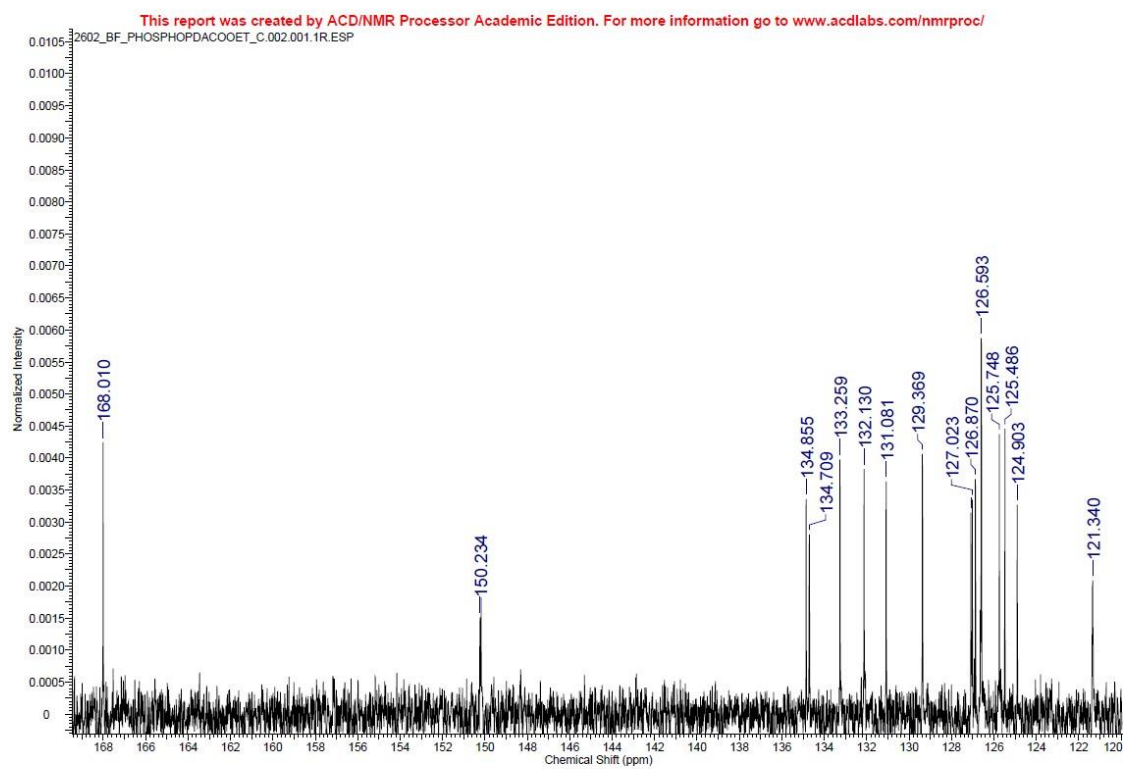

Figure S28:  $^{13}\text{C}$ -NMR of compound **1**.



Compound 3 in methanol d4

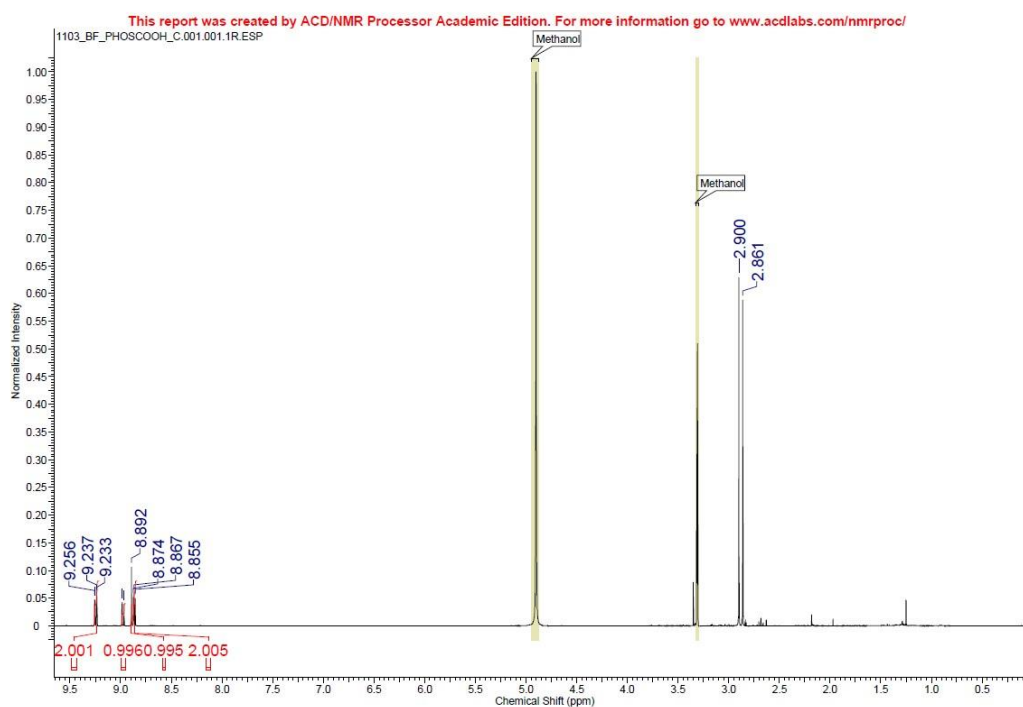

Figure S29:  $^1\text{H}$ -NMR of compound **3**.

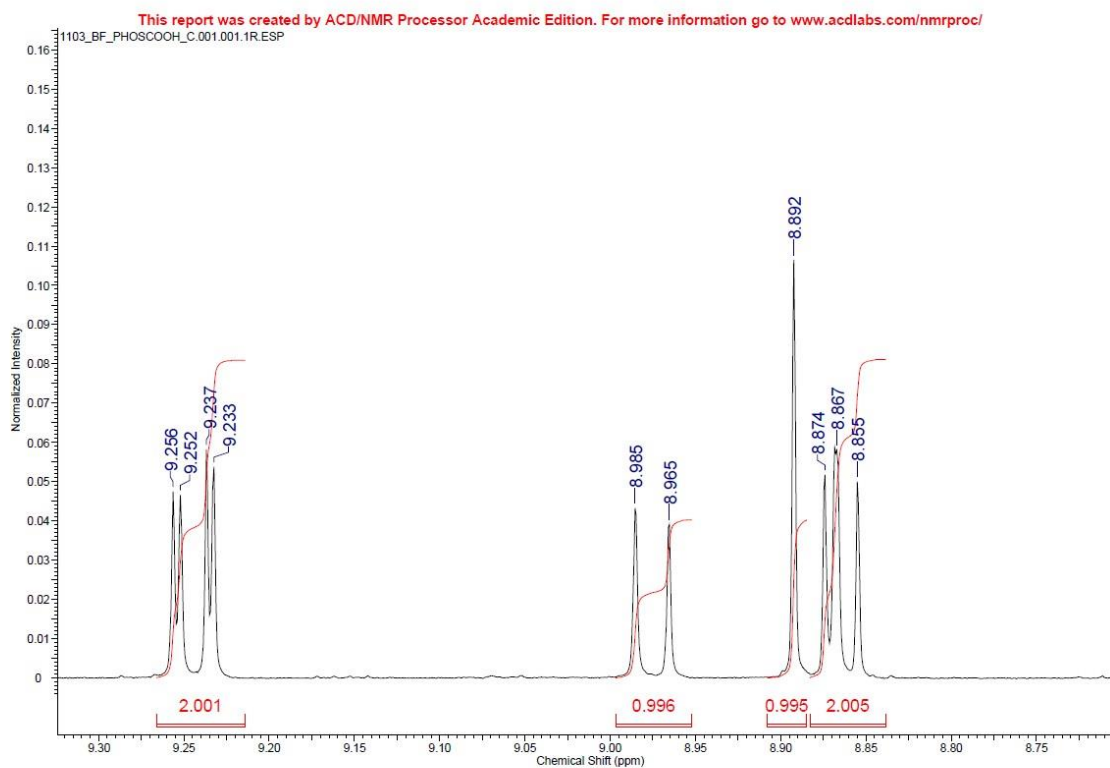

Figure S30:  $^1\text{H}$ -NMR of compound **3**.



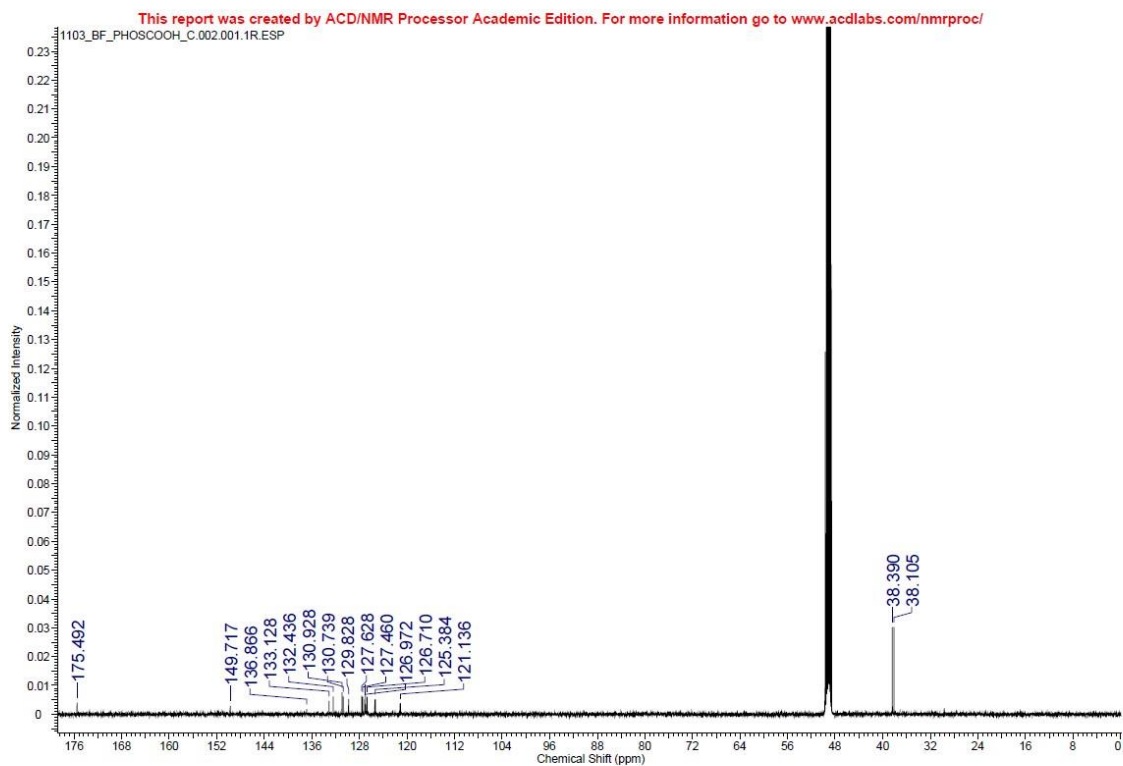

Figure S31:  $^{13}\text{C}$ -NMR of compound **3**.

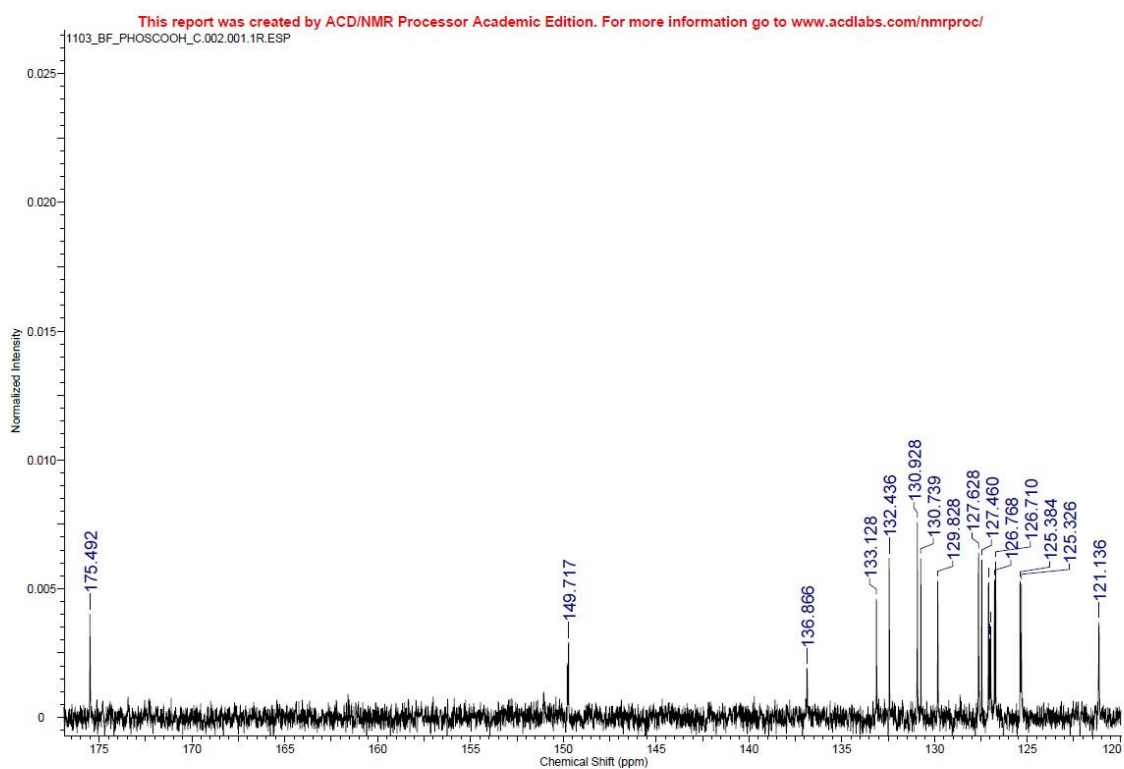

Figure S32:  $^{13}\text{C}$ -NMR of compound **3**.

## Crystallographic data

Crystallographic data for compound **7**

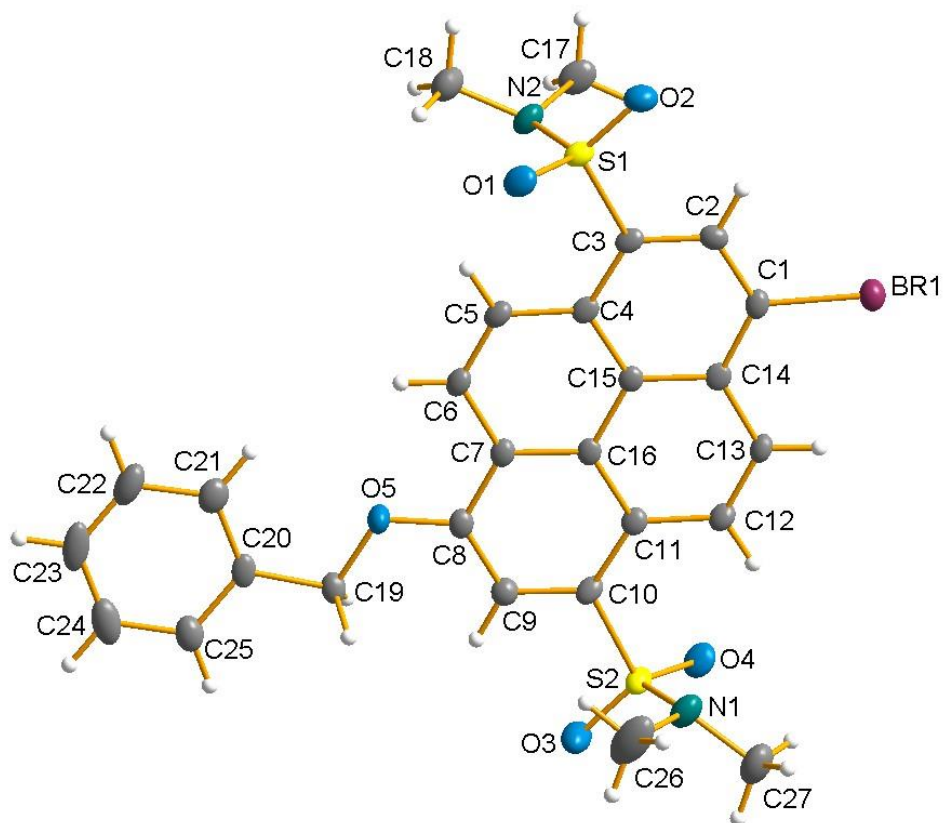

Figure S33: Crystallographic structure of compound **7**.

Table S1: Crystal data and structure refinement for compound **7**.

|                                   |                                                                                 |                               |
|-----------------------------------|---------------------------------------------------------------------------------|-------------------------------|
| Identification code               | sh3536                                                                          |                               |
| Empirical formula                 | C <sub>27</sub> H <sub>25</sub> Br N <sub>2</sub> O <sub>5</sub> S <sub>2</sub> |                               |
| Formula weight                    | 601.52                                                                          |                               |
| Temperature                       | 162(2) K                                                                        |                               |
| Wavelength                        | 0.71073 Å                                                                       |                               |
| Crystal system                    | Triclinic                                                                       |                               |
| Space group                       | P-1                                                                             |                               |
| Unit cell dimensions              | a = 6.9628(9) Å                                                                 | $\alpha = 112.085(5)^\circ$ . |
|                                   | b = 14.1150(15) Å                                                               | $\beta = 96.677(7)^\circ$ .   |
|                                   | c = 14.1917(14) Å                                                               | $\gamma = 97.399(7)^\circ$ .  |
| Volume                            | 1260.9(2) Å <sup>3</sup>                                                        |                               |
| Z                                 | 2                                                                               |                               |
| Density (calculated)              | 1.584 Mg/m <sup>3</sup>                                                         |                               |
| Absorption coefficient            | 1.839 mm <sup>-1</sup>                                                          |                               |
| F(000)                            | 616                                                                             |                               |
| Crystal size                      | 0.484 x 0.102 x 0.081 mm <sup>3</sup>                                           |                               |
| Theta range for data collection   | 1.574 to 27.102°.                                                               |                               |
| Index ranges                      | -8<= <i>h</i> <=8, -18<= <i>k</i> <=18, -18<= <i>l</i> <=18                     |                               |
| Reflections collected             | 19111                                                                           |                               |
| Independent reflections           | 5417 [R(int) = 0.0582]                                                          |                               |
| Completeness to theta = 25.242°   | 98.3 %                                                                          |                               |
| Absorption correction             | Semi-empirical from equivalents                                                 |                               |
| Max. and min. transmission        | 0.7455 and 0.5915                                                               |                               |
| Refinement method                 | Full-matrix least-squares on F <sup>2</sup>                                     |                               |
| Data / restraints / parameters    | 5417 / 315 / 338                                                                |                               |
| Goodness-of-fit on F <sup>2</sup> | 1.057                                                                           |                               |
| Final R indices [I>2sigma(I)]     | R1 = 0.0488, wR2 = 0.1173                                                       |                               |
| R indices (all data)              | R1 = 0.0712, wR2 = 0.1295                                                       |                               |
| Extinction coefficient            | n/a                                                                             |                               |
| Largest diff. peak and hole       | 0.910 and -1.206 e.Å <sup>-3</sup>                                              |                               |

Table S2: Atomic coordinates ( $\times 10^4$ ) and equivalent isotropic displacement parameters ( $\text{\AA}^2 \times 10^3$ ) for compound **7**. U(eq) is defined as one third of the trace of the orthogonalized  $U^{ij}$  tensor.

|       | x       | y       | z        | U(eq) |
|-------|---------|---------|----------|-------|
| Br(1) | 4169(1) | 7306(1) | 10772(1) | 24(1) |
| S(1)  | 3156(1) | 9181(1) | 8048(1)  | 19(1) |
| S(2)  | 2531(1) | 2060(1) | 6121(1)  | 21(1) |
| N(1)  | 554(5)  | 1956(2) | 6620(2)  | 28(1) |
| N(2)  | 5083(5) | 9356(2) | 7536(2)  | 25(1) |
| O(1)  | 1449(4) | 9002(2) | 7286(2)  | 26(1) |
| O(2)  | 3284(4) | 9972(2) | 9057(2)  | 27(1) |
| O(3)  | 2325(5) | 1267(2) | 5107(2)  | 36(1) |
| O(4)  | 4179(4) | 2157(2) | 6877(2)  | 27(1) |
| O(5)  | 2160(4) | 4156(2) | 3872(2)  | 24(1) |
| C(1)  | 3702(5) | 7165(3) | 9381(2)  | 17(1) |
| C(2)  | 3668(5) | 8056(2) | 9203(2)  | 18(1) |
| C(3)  | 3344(5) | 8000(2) | 8202(3)  | 17(1) |
| C(4)  | 3089(5) | 7049(2) | 7340(2)  | 16(1) |
| C(5)  | 2841(5) | 6962(3) | 6290(3)  | 19(1) |
| C(6)  | 2630(5) | 6032(2) | 5491(3)  | 19(1) |
| C(7)  | 2618(5) | 5091(2) | 5657(2)  | 17(1) |
| C(8)  | 2375(5) | 4123(3) | 4821(2)  | 19(1) |
| C(9)  | 2356(5) | 3217(3) | 4991(3)  | 19(1) |
| C(10) | 2568(5) | 3268(2) | 5995(3)  | 18(1) |
| C(11) | 2834(5) | 4210(2) | 6864(2)  | 17(1) |
| C(12) | 3084(5) | 4299(2) | 7918(2)  | 19(1) |
| C(13) | 3363(5) | 5231(2) | 8715(2)  | 18(1) |
| C(14) | 3404(5) | 6182(2) | 8567(2)  | 16(1) |
| C(15) | 3114(5) | 6128(2) | 7531(2)  | 15(1) |
| C(16) | 2848(5) | 5137(2) | 6681(2)  | 15(1) |
| C(17) | 6982(6) | 9703(3) | 8246(3)  | 31(1) |
| C(18) | 4925(7) | 9803(3) | 6758(3)  | 34(1) |
| C(19) | 1984(5) | 3202(3) | 2996(2)  | 19(1) |
| C(20) | 1710(5) | 3414(3) | 2029(2)  | 20(1) |
| C(21) | 1855(6) | 4405(3) | 2042(3)  | 26(1) |
| C(22) | 1598(6) | 4536(3) | 1108(3)  | 34(1) |
| C(23) | 1230(6) | 3696(4) | 184(3)   | 37(1) |

|       |          |         |         |       |
|-------|----------|---------|---------|-------|
| C(24) | 1106(6)  | 2705(4) | 166(3)  | 36(1) |
| C(25) | 1333(6)  | 2564(3) | 1084(3) | 26(1) |
| C(26) | -1312(7) | 1777(4) | 5915(4) | 55(1) |
| C(27) | 486(7)   | 1287(3) | 7194(3) | 39(1) |

---

## Mass spectra

Table S3: Data from mass spectroscopic analysis.

| Dye/<br>scanmode                  | Formula        | [M-H] <sup>-</sup> /<br>[M+H] <sup>+</sup><br>calculated | [M-H] <sup>-</sup> /<br>[M+H] <sup>+</sup><br>found | Deviation<br>/ ppm | <i>comment</i>                         |
|-----------------------------------|----------------|----------------------------------------------------------|-----------------------------------------------------|--------------------|----------------------------------------|
| <b>5</b><br><b>ES<sup>-</sup></b> | C16H9BrO       | 294.975852                                               | 294.97555                                           | -1.02              | Br-79                                  |
|                                   |                | 295.979207                                               | 295.97893                                           | -0.94              | "; C-13                                |
|                                   |                | 296.973806                                               | 296.97352                                           | -0.96              | Br-81                                  |
|                                   |                | 297.977161                                               | 297.9769                                            | -0.88              | "; C-13                                |
| <b>6</b><br><b>ES<sup>-</sup></b> | C20H19BrN2O5S2 | 508.984052                                               | 508.98384                                           | -0.42              | Br-79; S-32                            |
|                                   |                | 509.987407                                               | 509.98762                                           | 0.42               | "; C-13                                |
|                                   |                | 510.982006                                               | 510.9816                                            | -0.80              | Br-81; S-32                            |
|                                   |                | 511.985361                                               | 511.98536                                           | -0.002             | "; C-13                                |
|                                   |                | 512.977802                                               | 512.97863                                           | 1.61               | Br-81; S-34                            |
| <b>7</b><br><b>ES<sup>+</sup></b> | C27H25BrN2O5S2 | 623.028043                                               | 623.02891                                           | 1.39               | Br-79; S-32;<br>Na <sup>+</sup> adduct |
|                                   |                | 624.031398                                               | 624.03232                                           | 1.48               | "; C-13                                |
|                                   |                | 625.025997                                               | 625.02684                                           | 1.35               | Br-81; 2xS-32                          |
|                                   |                | 626.029352                                               | 626.03016                                           | 1.29               | "; C-13                                |
|                                   |                | 627.021793                                               | 627.02257                                           | 1.24               | "; 1xS-32;<br>1xS-34                   |
| <b>8</b><br><b>ES<sup>+</sup></b> | C30H30N2O7S2   | 617.138661                                               | 617.13953                                           | 1.41               | 2xS-32; Na <sup>+</sup><br>adduct      |
|                                   |                | 618.142016                                               | 618.14307                                           | 1.71               | "; C-13                                |
|                                   |                | 619.134457                                               | 619.13535                                           | 1.44               | 1x-S-32; 1xS-<br>34                    |
| <b>2</b><br><b>ES<sup>-</sup></b> | C23H24N2O7S2   | 503.09467                                                | 503.09282                                           | -3.68              | S-32                                   |
|                                   |                | 504.098025                                               | 504.0971                                            | -1.84              | "; C-13                                |
|                                   |                | 505.090466                                               | 505.09014                                           | -0.65              | S-34                                   |
| <b>4</b><br><b>ES<sup>-</sup></b> | C21H20N2O7S2   | 475.06337                                                | 475.06494                                           | 3.31               | 2x B-11                                |
|                                   |                | 476.066725                                               | 476.06773                                           | 2.11               | 2x B-11; C-<br>13                      |
|                                   |                | 477.059166                                               | 477.05931                                           | 0.30               | 2x B-11; 2x<br>C-13                    |
| <b>1</b><br><b>ES<sup>-</sup></b> | C23H25N2O10PS2 | 583.06155                                                | 583.06245                                           | 1.54               |                                        |
|                                   |                | 584.064905                                               | 584.06619                                           | 2.20               | C-13                                   |
| <b>3</b><br><b>ES<sup>-</sup></b> | C21H21N2O10PS2 | 555.03025                                                | 555.03196                                           | 3.08               |                                        |
|                                   |                | 556.033605                                               | 556.03549                                           | 3.39               | C-13                                   |

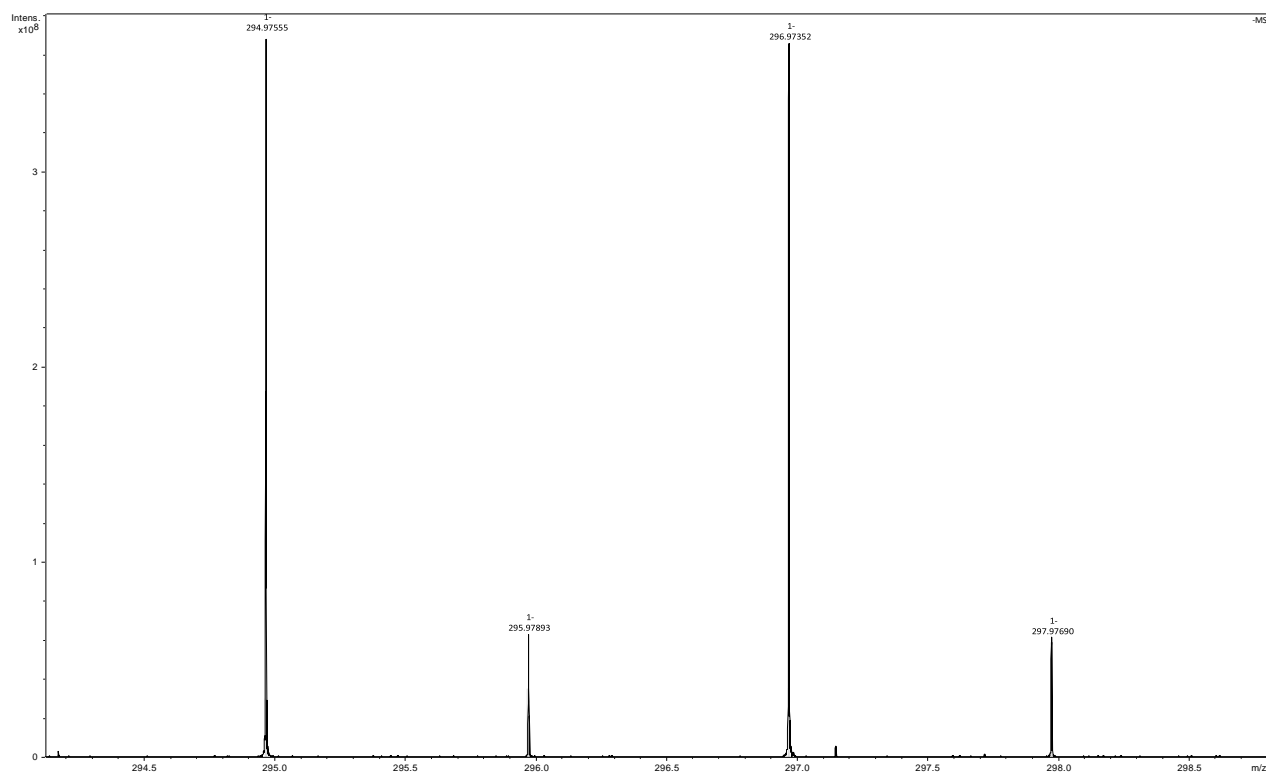

Figure S34: ES<sup>-</sup> Spectrum of compound **5**.

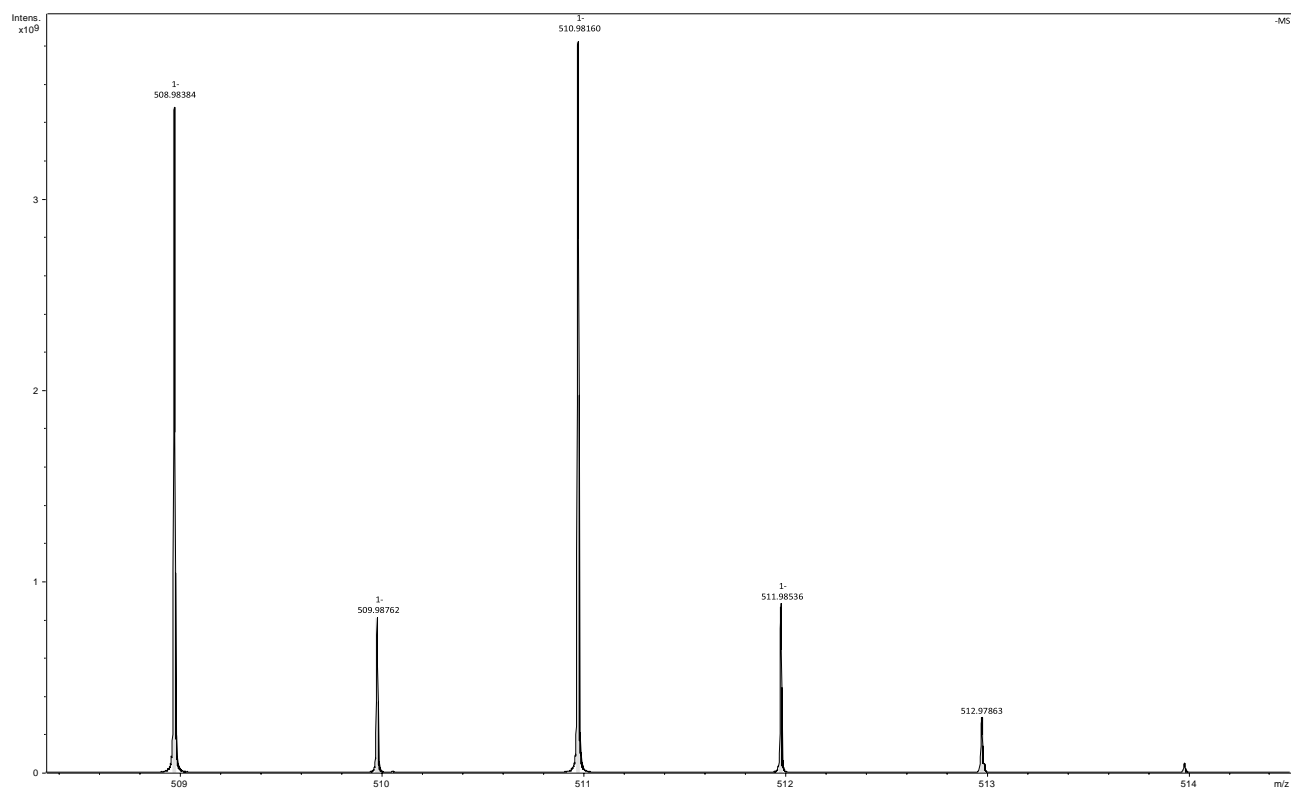

Figure S35: ES<sup>-</sup> Spectrum of compound **6**.

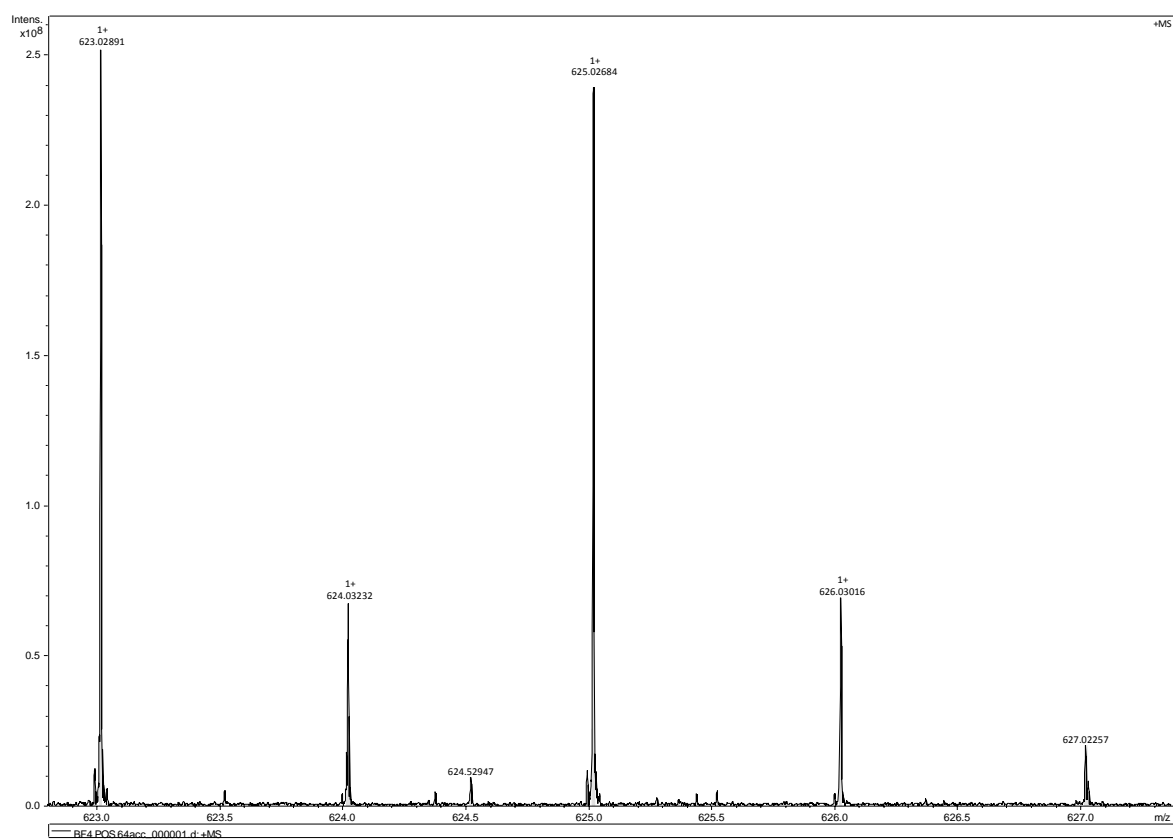

Figure S36: ES<sup>+</sup> Spectrum of compound **7**.

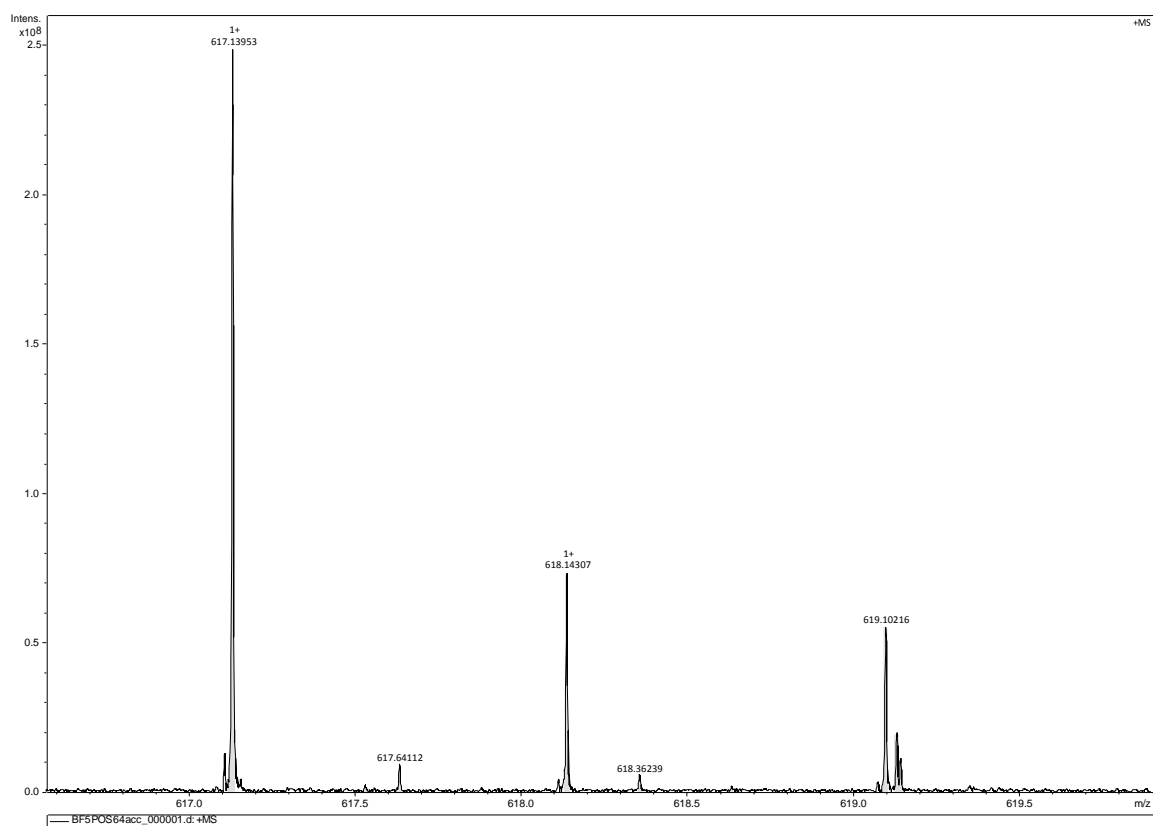

Figure S37: ES<sup>+</sup> Spectrum of compound **8**.



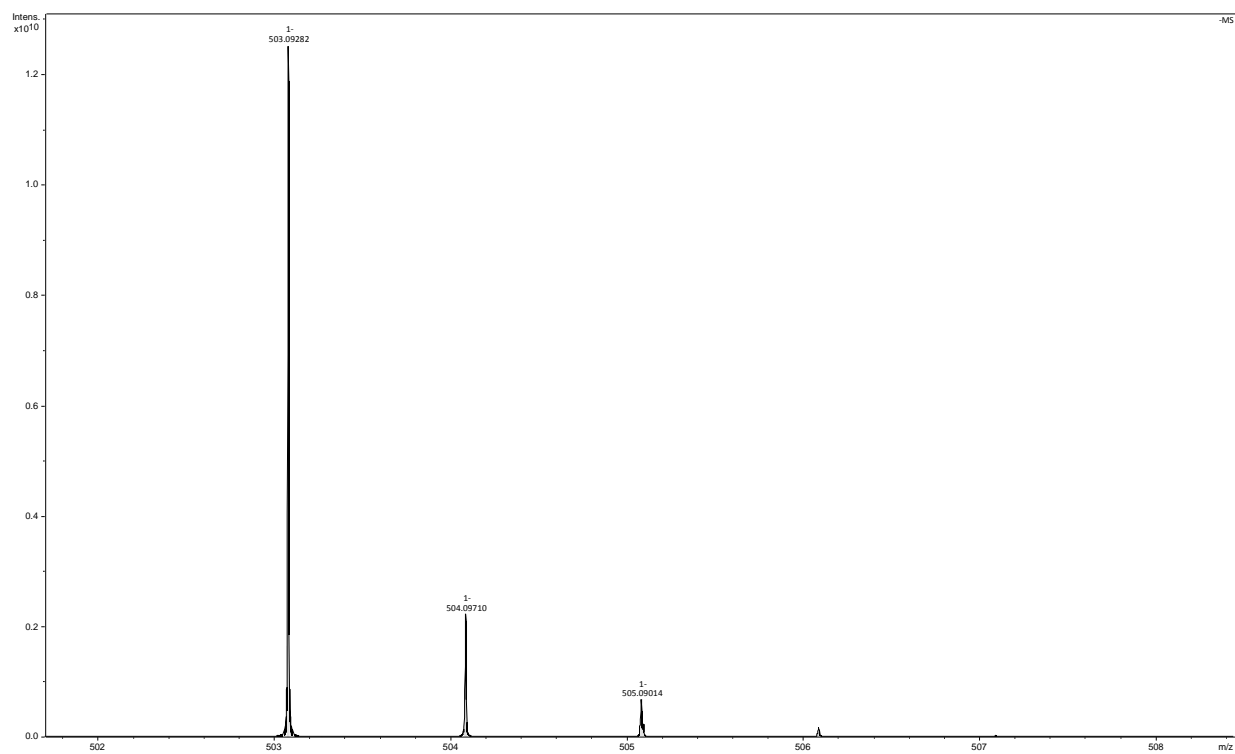

Figure S38: ES<sup>-</sup> Spectrum of compound **2**.

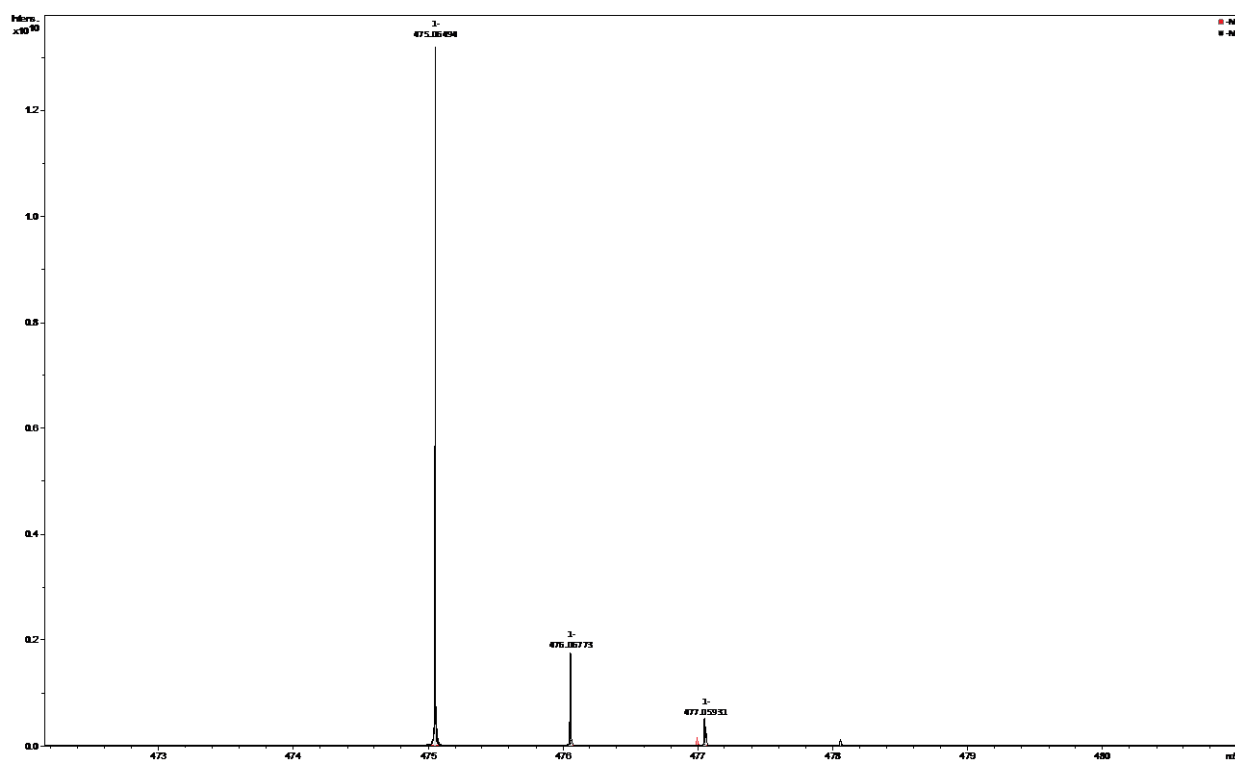

Figure S39: ES<sup>-</sup> Spectrum of compound **4**.

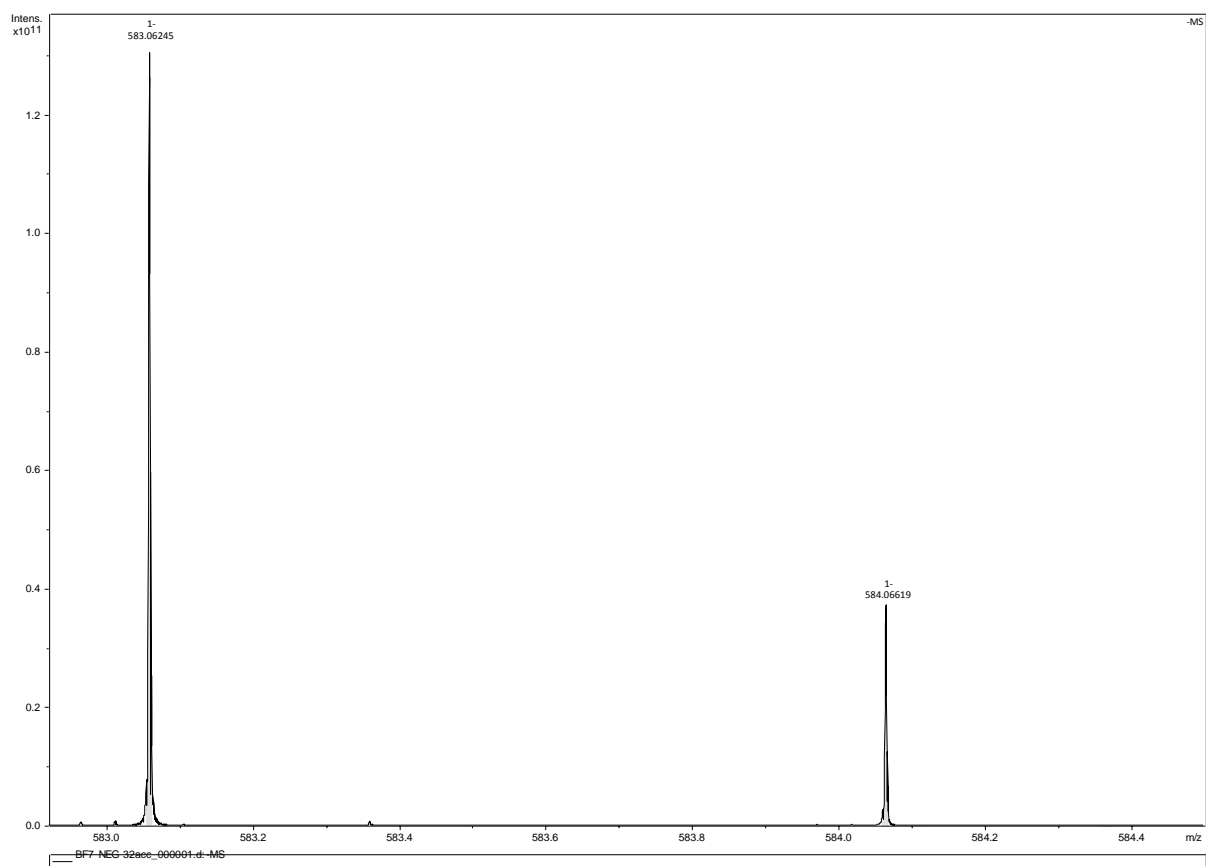

Figure S40: ES<sup>-</sup> Spectrum of compound **1**.

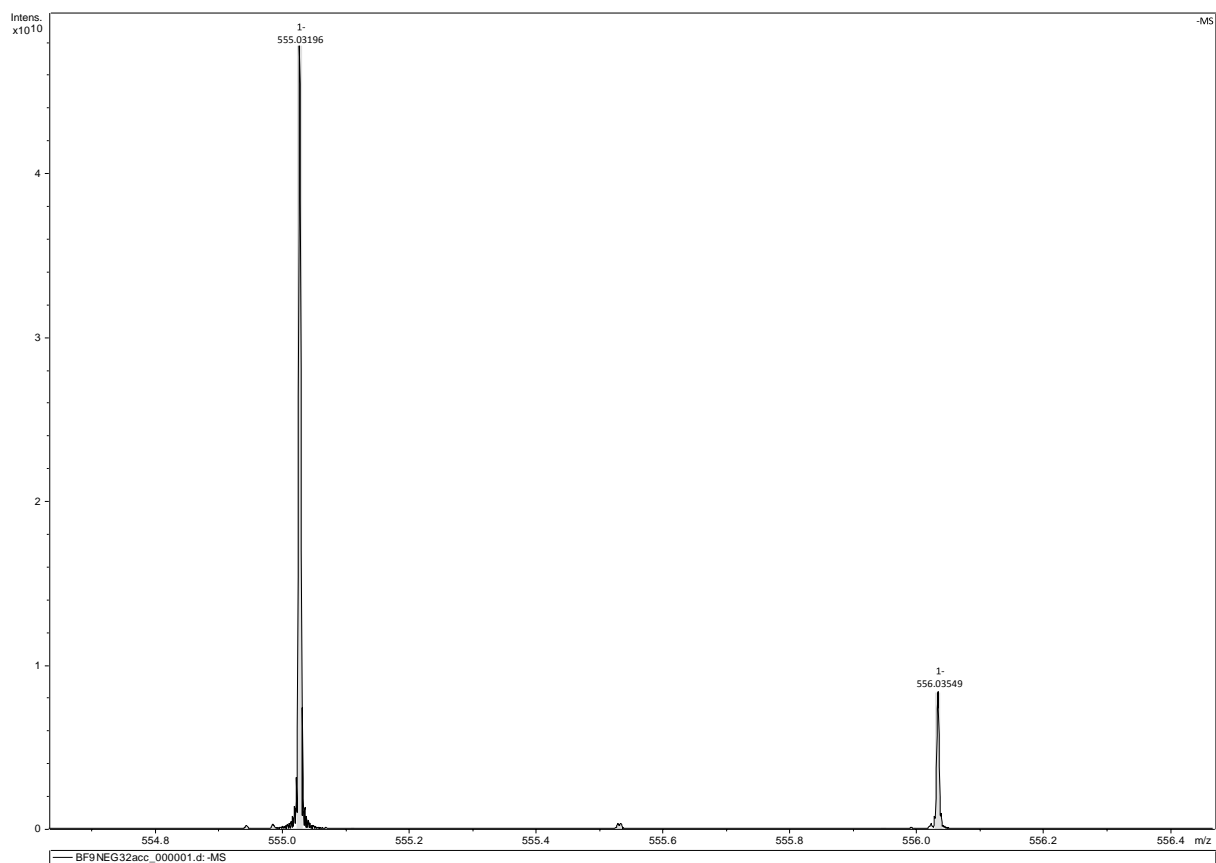

Figure S41: ES<sup>-</sup> Spectrum of compound **3**.

## Fluorescence spectra

### Compound 1

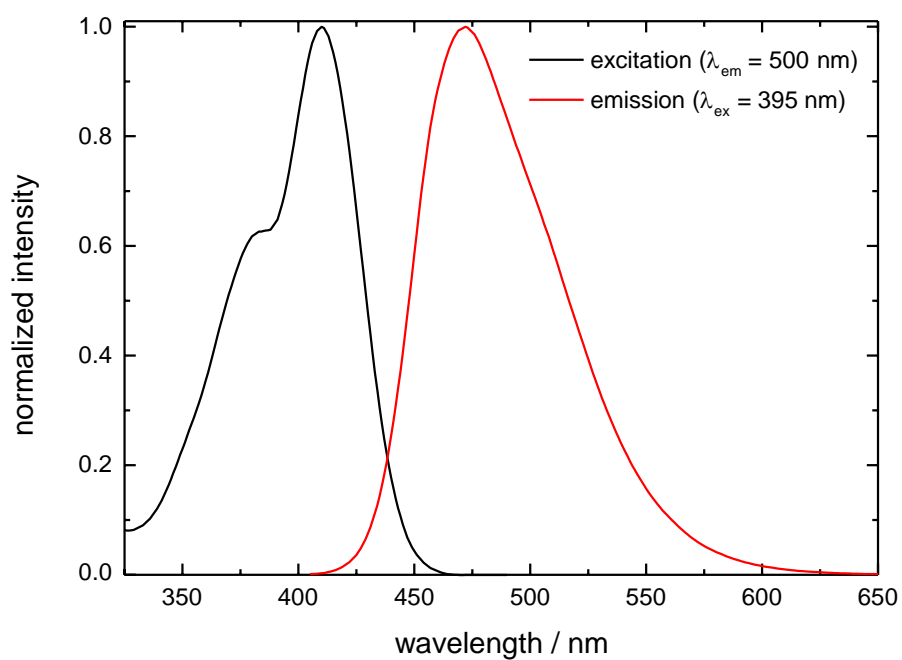

Figure S42: Fluorescence spectra of compound **1** in H<sub>2</sub>O at pH = 8.

### Compound 2

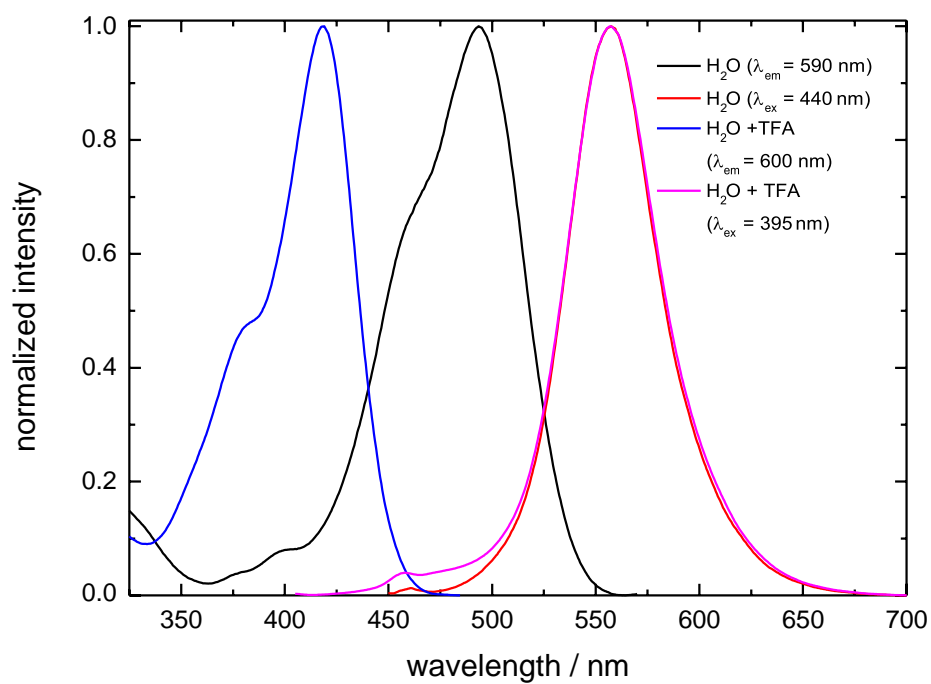

Figure S43: Fluorescence spectra of compound **2** in H<sub>2</sub>O.

### Compound 3

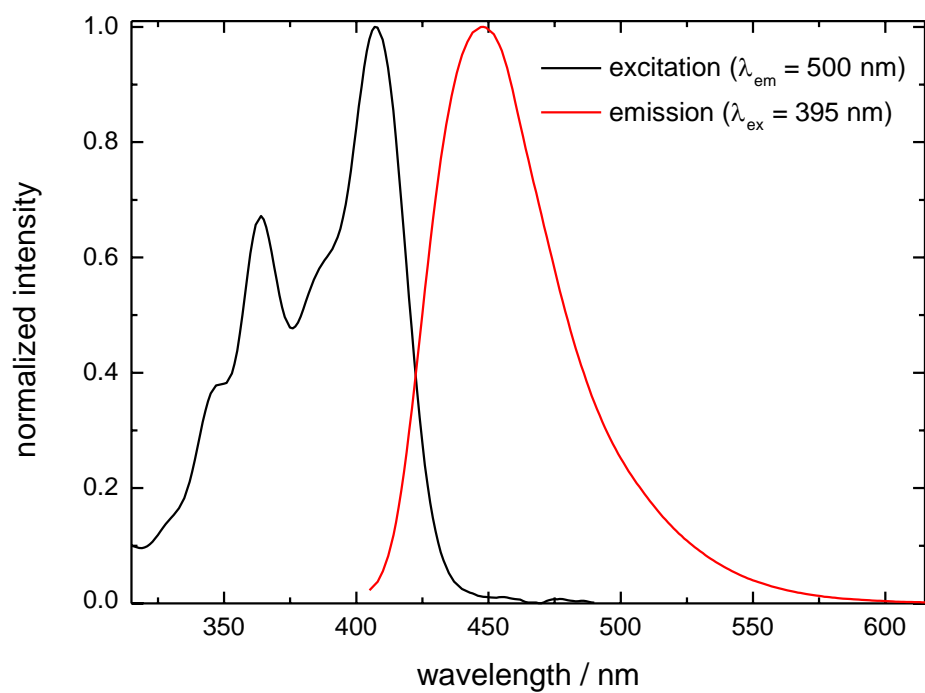

Figure S44: Fluorescence spectra of compound **3** in H<sub>2</sub>O at pH = 8.

### Compound 4

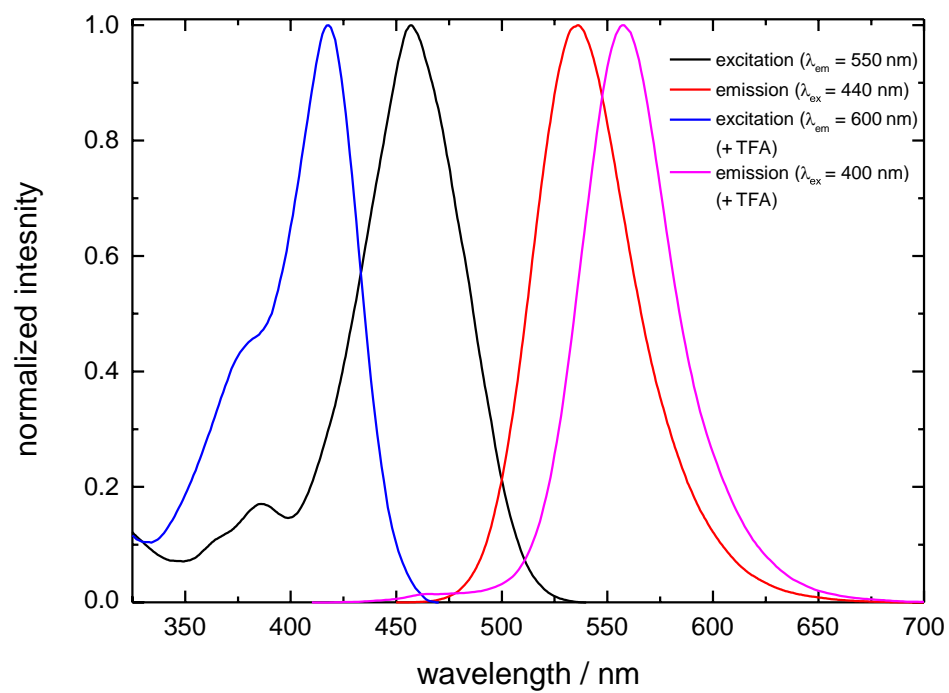

Figure S45: Fluorescence spectra of compound **4** in H<sub>2</sub>O.

## Time-resolved fluorescence spectra

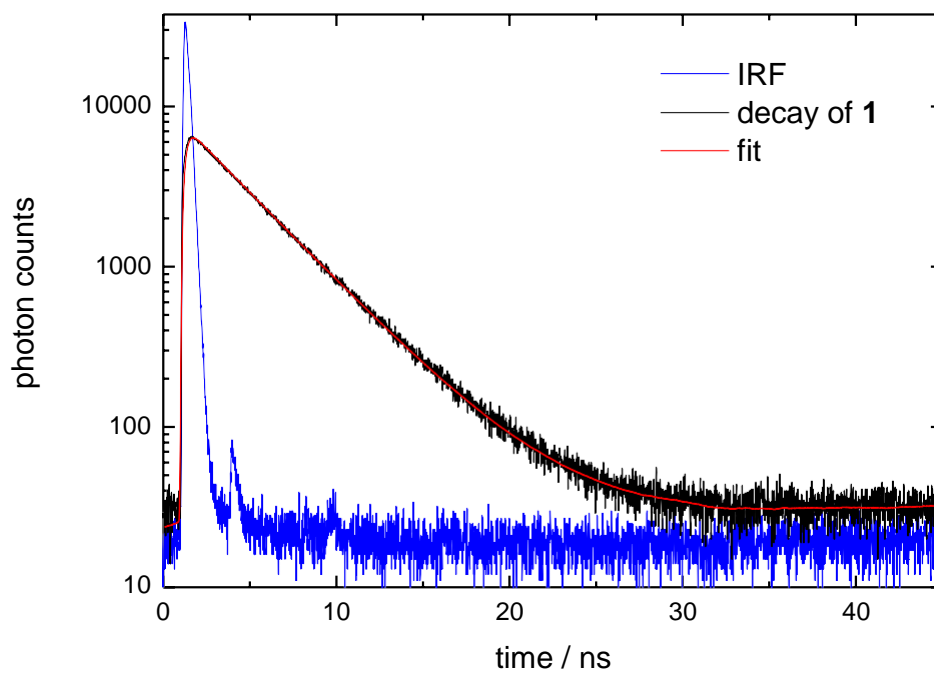

Figure S46: TCSPC histogram of compound **1** in H<sub>2</sub>O at pH = 8;  $\lambda_{\text{ex}} = 405$  nm;  $\lambda_{\text{det}} = 450 - 490$  nm.

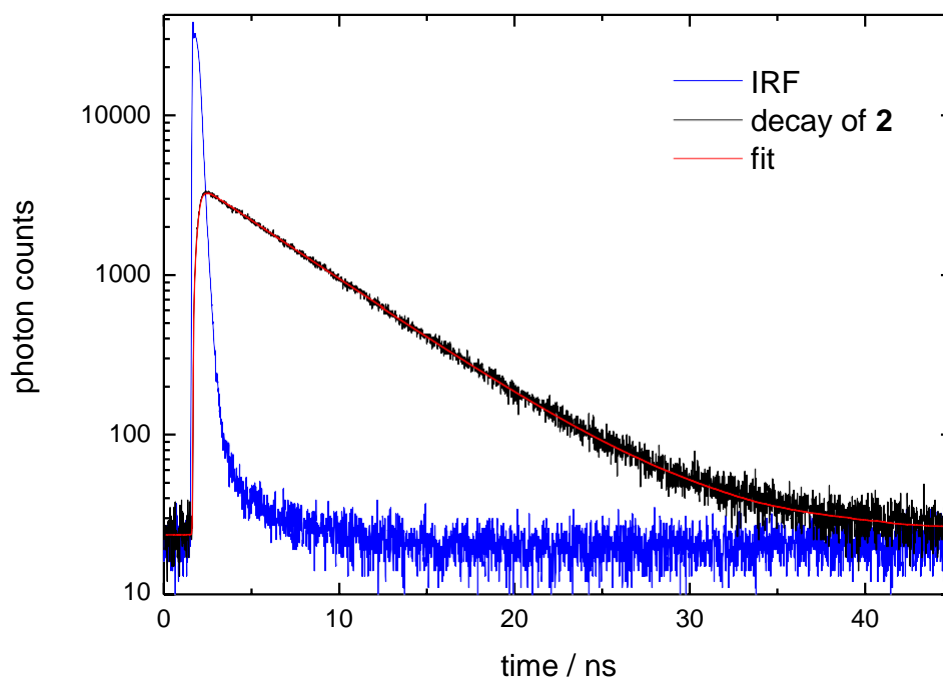

Figure S47: TCSPC histogram of compound **2** in H<sub>2</sub>O at pH = 8;  $\lambda_{\text{ex}} = 470$  nm;  $\lambda_{\text{det}} = 555 - 625$  nm.

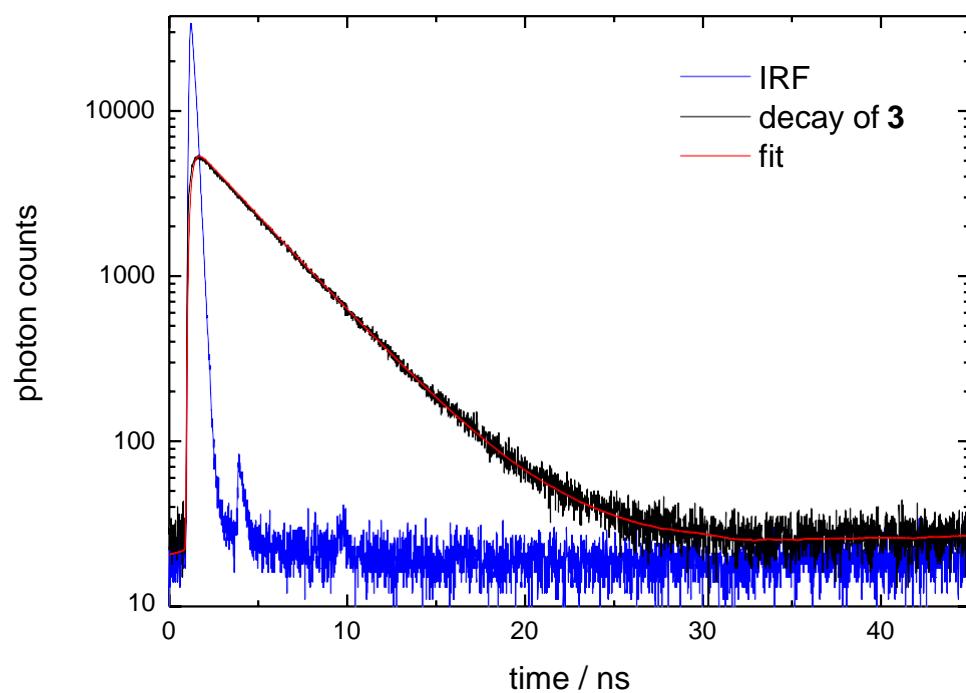

Figure S48: TCSPC histogram of compound **3** in H<sub>2</sub>O at pH = 8;  $\lambda_{\text{ex}} = 405$  nm;  $\lambda_{\text{det}} = 450 - 490$  nm.

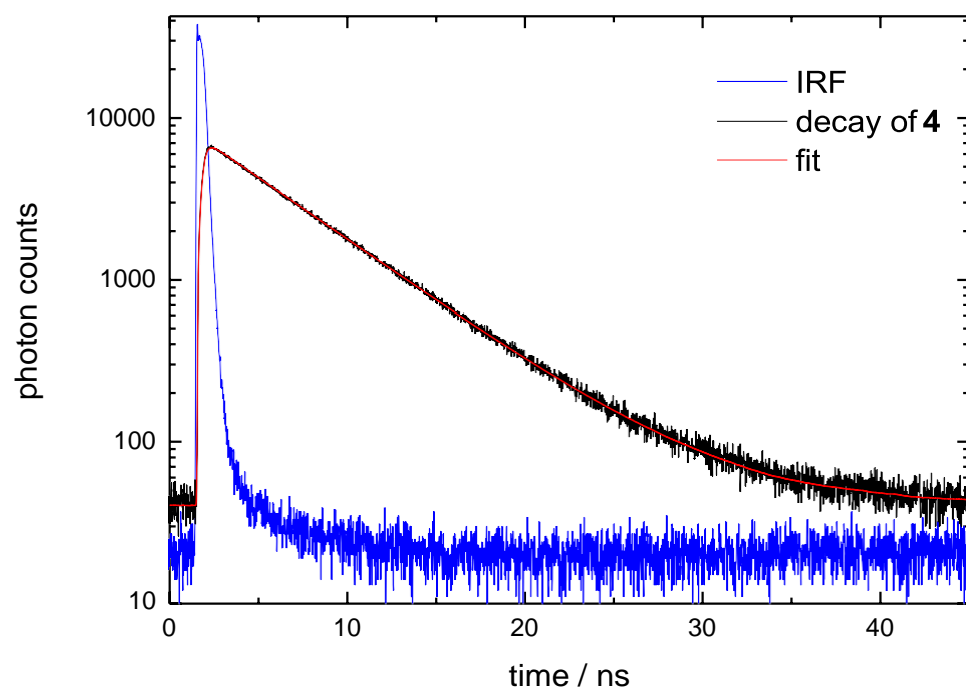

Figure S49: TCSPC histogram of compound **4** in H<sub>2</sub>O at pH = 8;  $\lambda_{\text{ex}} = 470$  nm;  $\lambda_{\text{det}} = 555 - 625$  nm.

## pK<sub>a</sub> determination with absorption/fluorescence titration

### Compound **2**

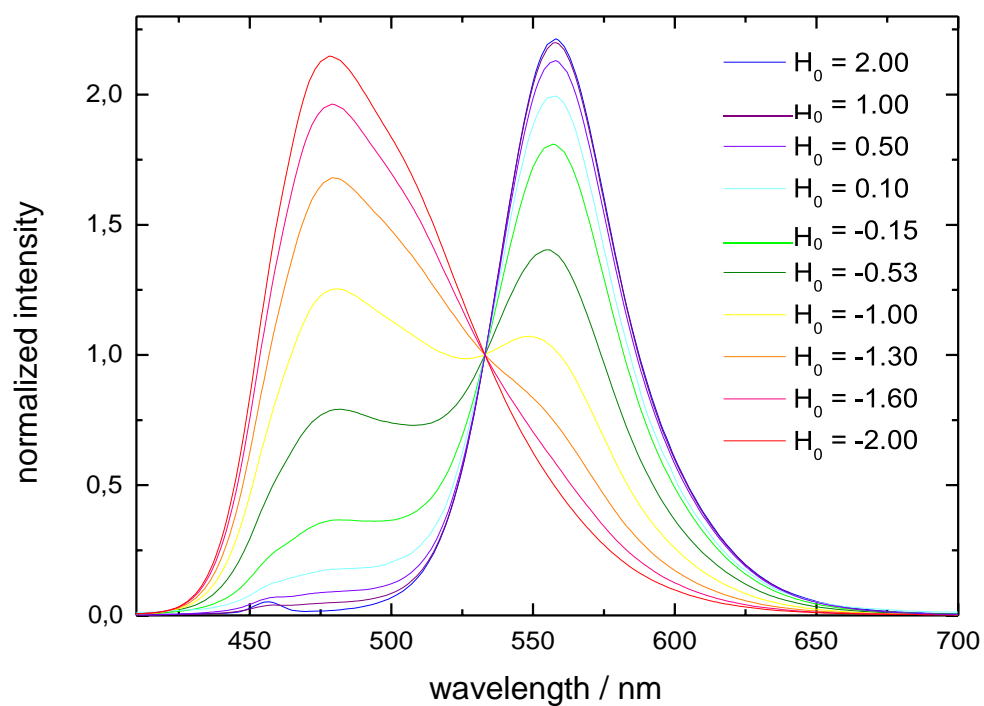

Figure S50: Fluorescence titration of compound **2** ( $\lambda_{\text{ex}} = 395$  nm).

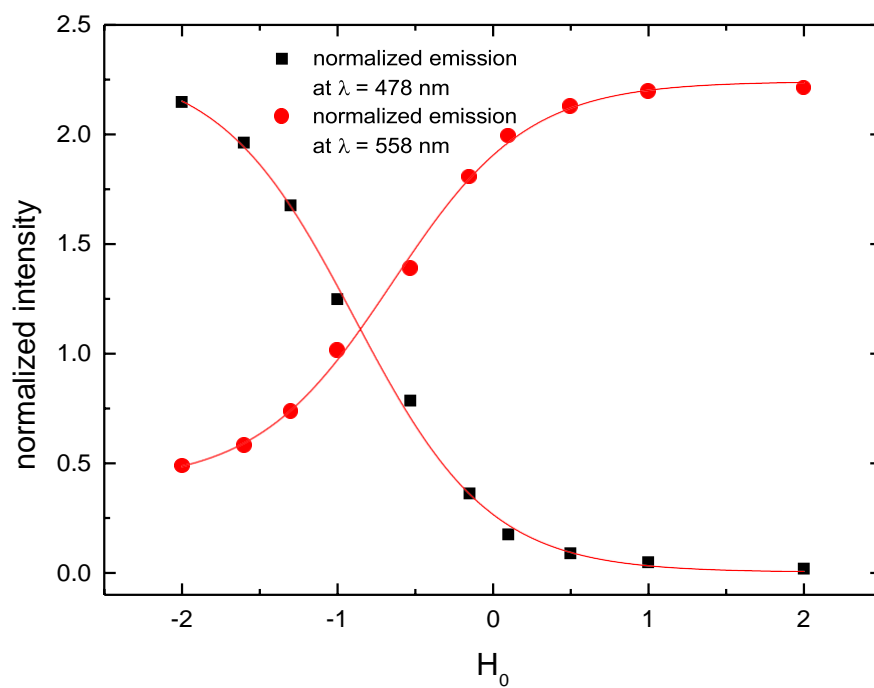

Figure S51: Fluorescence maxima of the ROH/RO<sup>-</sup> forms of compound **2**.

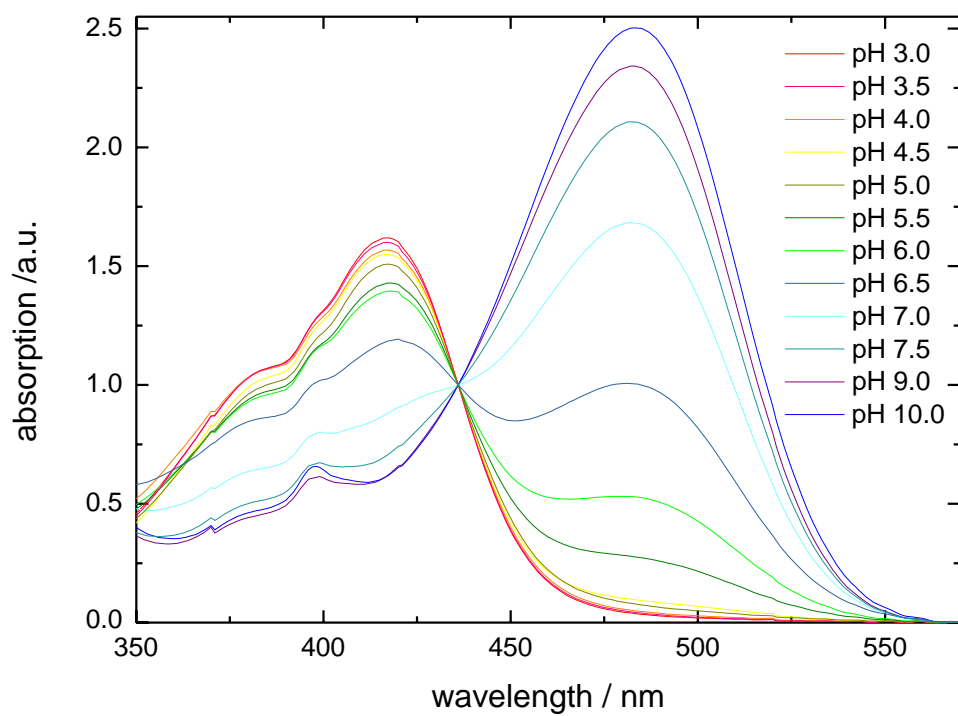

Figure S52: Absorption titration of compound **2**.

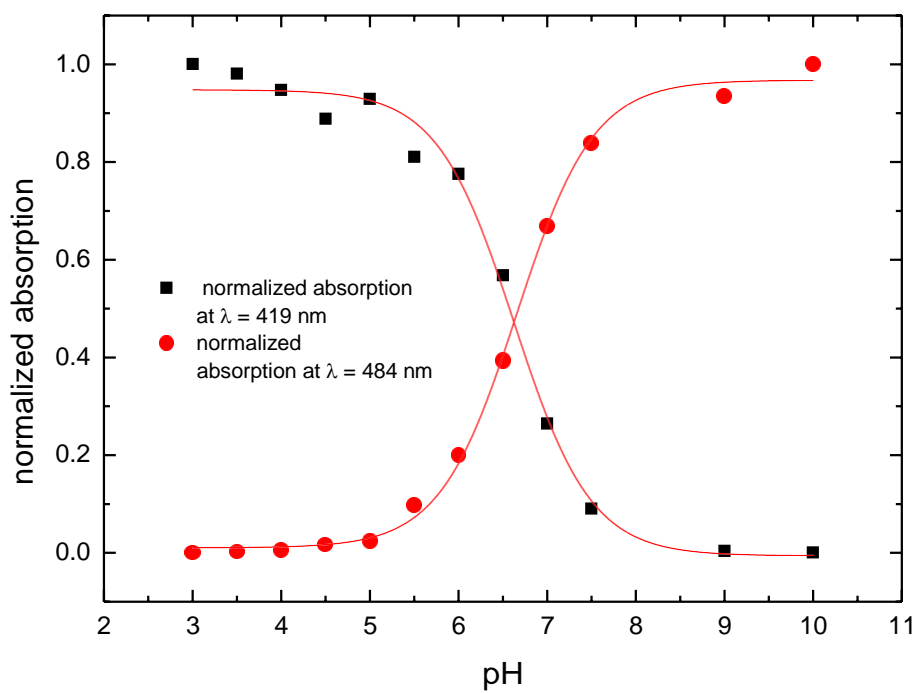

Figure S53: Absorption maxima of the ROH/RO<sup>-</sup> forms of compound **2**.



#### Compound 4

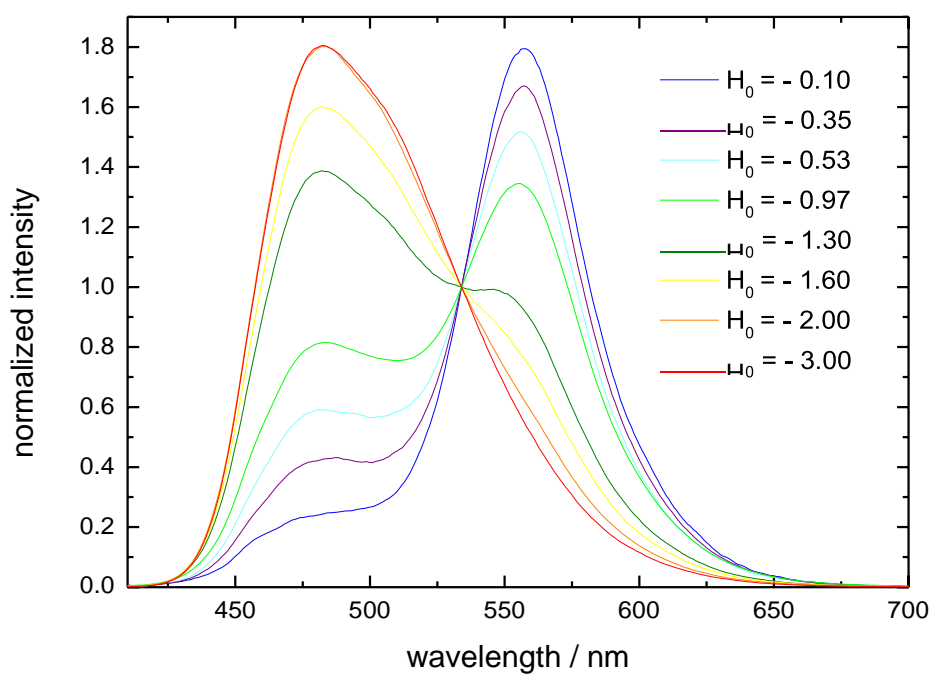

Figure S54: Fluorescence titration of the ROH function of compound 4 ( $\lambda_{\text{ex}} = 395$  nm).

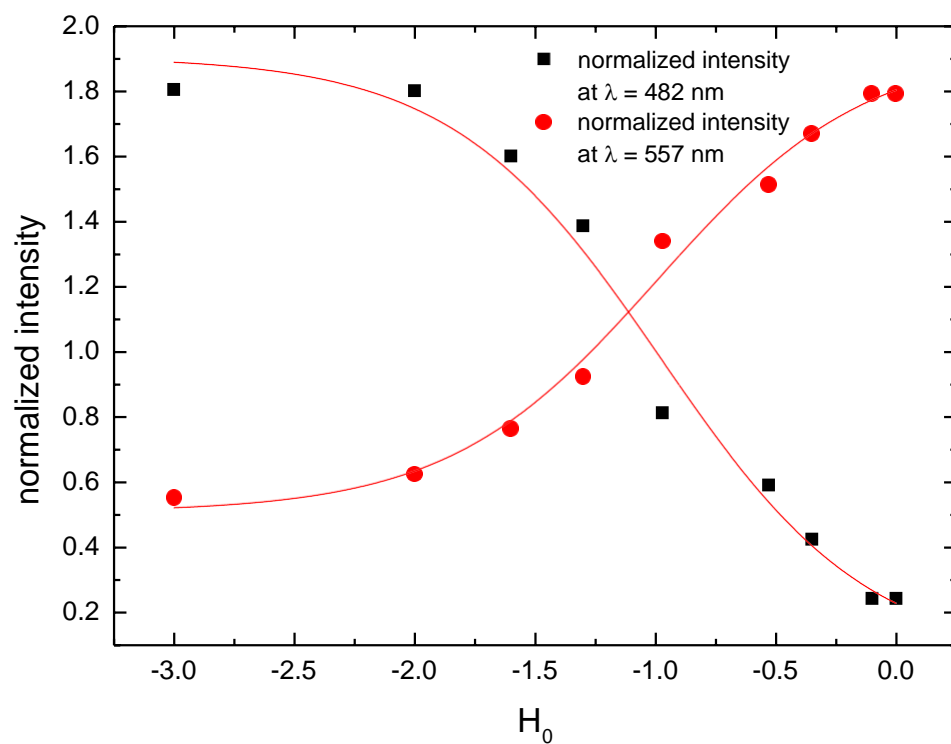

Figure S55: Fluorescence maxima of the ROH/RO<sup>-</sup> forms of compound 4.

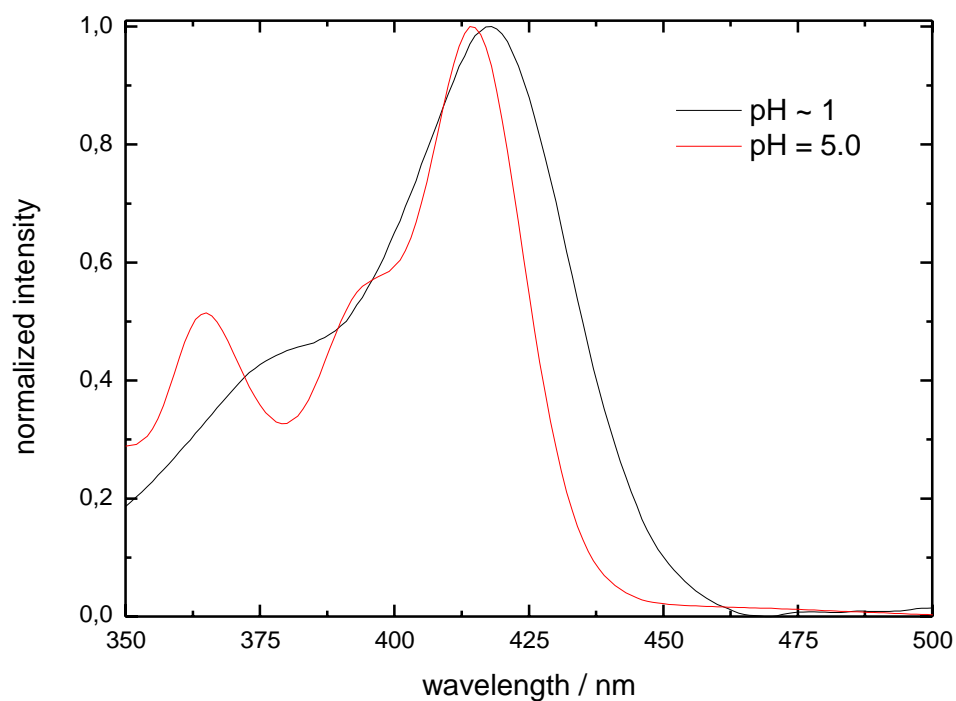

Figure S56: Fluorescence excitation spectra of compound **4** at different pH values ( $\lambda_{\text{em}} = 580 \text{ nm}$ ).

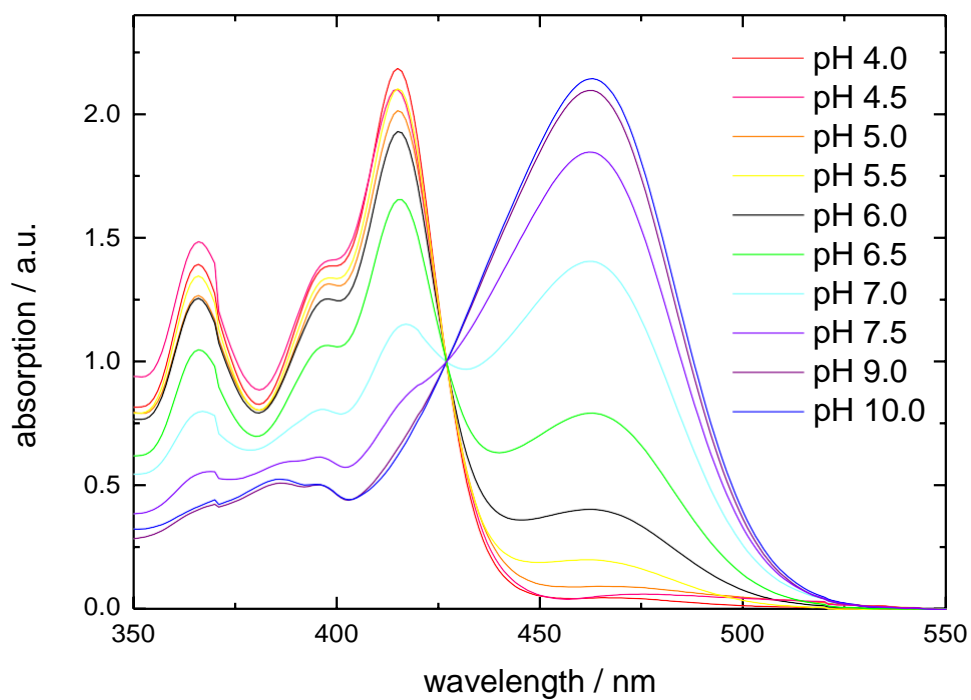

Figure S57: Absorption titration of the ROH function of compound **4**.

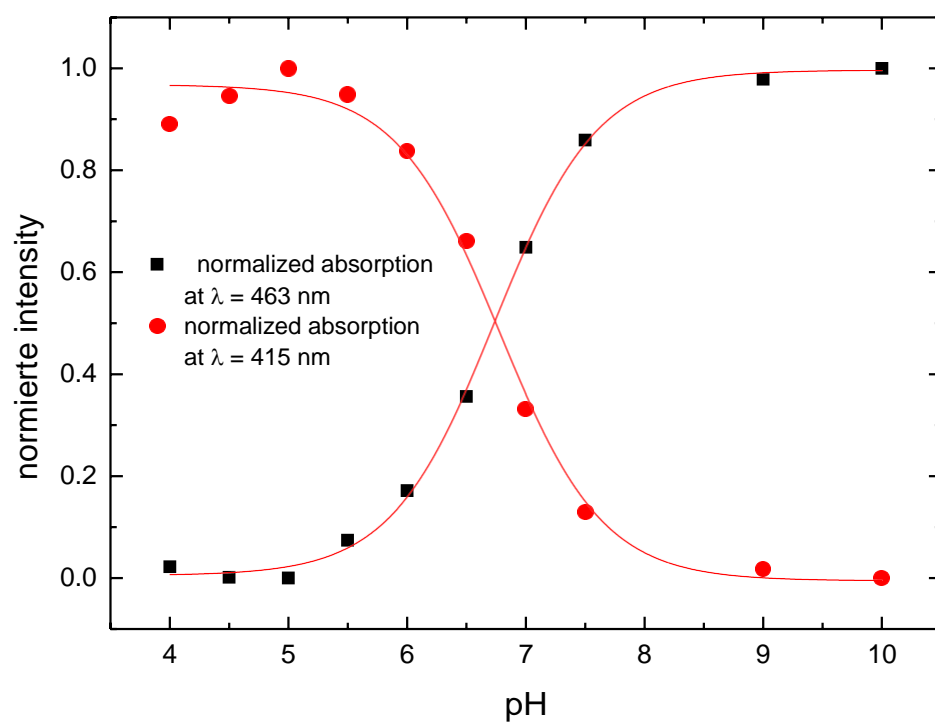

Figure S58: Absorption maxima of the ROH/RO<sup>-</sup> forms of compound **4**.

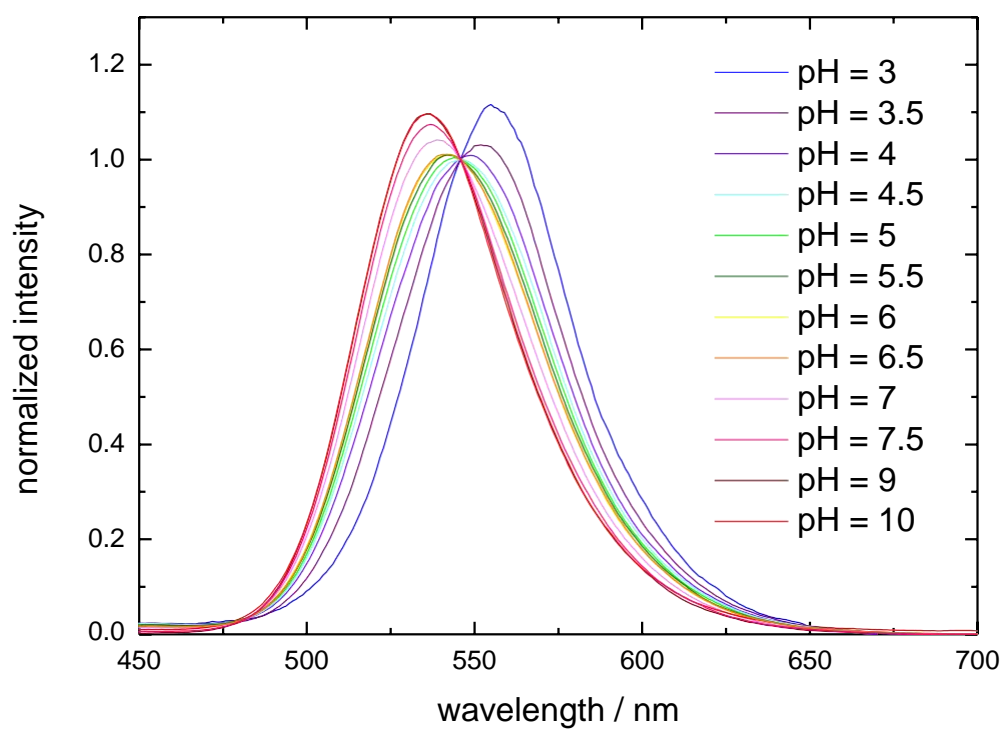

Figure S59: Fluorescence titration of the RCOOH function of compound **4** ( $\lambda_{\text{ex}} = 395$  nm).

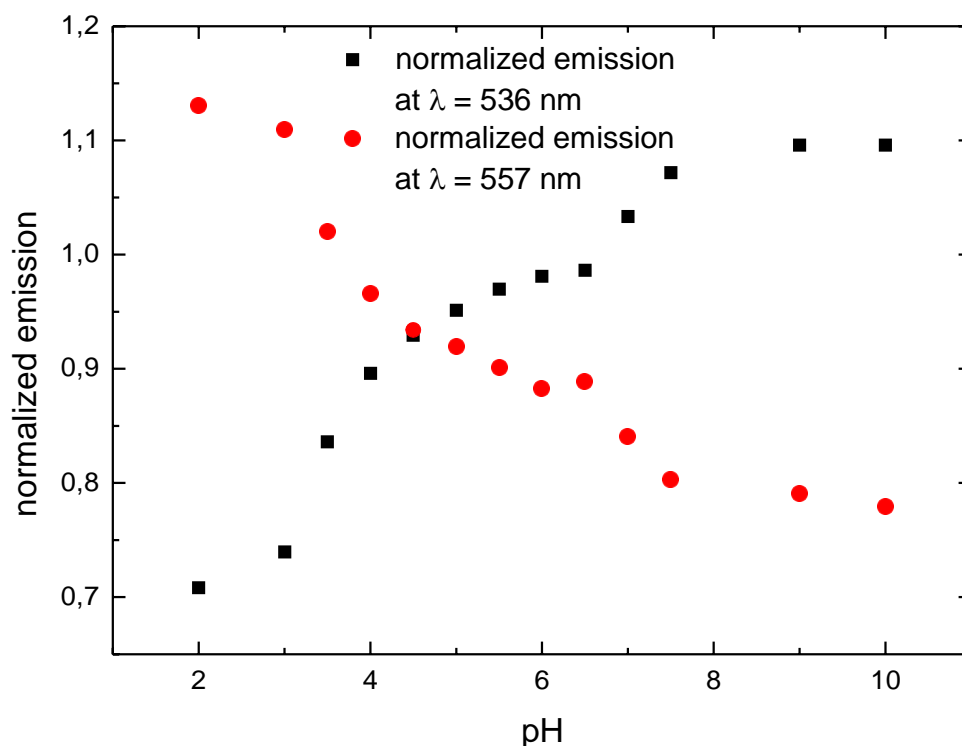

Figure S60: Fluorescence maxima of the RCOOH/RCOO<sup>-</sup> forms of compound **4**.

Table S4: Spectrophysical data of compounds **1-4**.

|                                 | <b>1</b> | <b>2</b>                                   | <b>3</b> | <b>4</b>                                                        |
|---------------------------------|----------|--------------------------------------------|----------|-----------------------------------------------------------------|
| $\lambda_{\text{max,abs}}$ [nm] | 410      | 419 <sup>[a]</sup> ; 484 <sup>[b]</sup>    | 407      | 418 <sup>[c]</sup> ; 415 <sup>[d]</sup> ; 463 <sup>[f]</sup>    |
| $\lambda_{\text{max,em}}$ [nm]  | 472      | 478 <sup>[a]</sup> ; 558 <sup>[b]</sup>    | 448      | 482 <sup>[c]</sup> ; 557 <sup>[e]</sup> ; 536 <sup>[f]</sup>    |
| $\text{pK}_a$ <sup>[i]</sup>    | -        | 6.6                                        | -        | 6.8 (ROHCOO <sup>-</sup> , );<br>~ 2.0 (RO <sup>-</sup> COOH)   |
| $\text{pK}_a^*$                 | -        | -0.4 <sup>[g]</sup><br>-0.8 <sup>[h]</sup> | -        | 4.5 (ROHCOOH) <sup>[g]</sup> ;<br>-0.9 (ROHCOOH) <sup>[h]</sup> |
| $\Phi$                          | 0.98     | 0.86 <sup>[b]</sup>                        | 1.00     | 0.85 <sup>[f]</sup>                                             |
| $\tau_{\text{fl, RO}^-}$ [ns]   | 3.89     | 5.81                                       | 3.73     | 5.58                                                            |

<sup>[a]</sup> ROH; <sup>[b]</sup> RO<sup>-</sup>; <sup>[c]</sup> ROHCOOH (**4a**); <sup>[d]</sup> ROHCOO<sup>-</sup> (**4d**); <sup>[e]</sup> RO<sup>-</sup>COOH (**4b**); <sup>[f]</sup> RO<sup>-</sup>COO<sup>-</sup> (**4c**); <sup>[g]</sup> determined via Förster cycle; <sup>[h]</sup> determined with fluorescence titration; <sup>[i]</sup> determined via absorption titration.

Structurally and electronically, the reaction products **2** and **4** bearing two sulfonamide groups are derivatives of the photoacid HPTA (N,N,N',N',N'',N''-hexamethyl-1,3,6-trisulfonamide).<sup>1-6</sup> The excited state acidity ( $\text{pK}_a^*$ , Table S4) of **2**, evaluated by fluorescence titration,<sup>7,8</sup> lies in the range of that of HPTA ( $\text{pK}_a^* = -0.4$  *resp.*  $-1.0$  (via Förster cycle))<sup>32</sup>. As

the ground state acidity is lower than that of HPTA, the enhancement of the acidity upon excitation ( $\Delta pK_a$ ) is higher by one logarithmic unit. Furthermore, the fluorescence emission of the corresponding base in aqueous solution is shifted bathochromically compared to that of HPTA. This finding is not in line with the trend we observed for different substituted HPTA derivatives.<sup>2</sup> Consequently, it can be concluded, that the connection between the photophysical properties and the substitution pattern is not only limited to the electron- withdrawing properties of one substituent. We assume that the electron withdrawing strength of a substituent is just one factor in a more complex process affecting the properties of the photoacids based on pyrene. The effect of different substitution patterns will be addressed in forthcoming publication.

### pK<sub>a</sub> determination with FCS

For comparison, the pK<sub>a</sub> values of the photoacids **2** and **4** were determined with fluorescence correlation spectroscopy, according to the experimental procedure of Widengren et al.<sup>9</sup> A detailed description of the evaluation of pK<sub>a</sub> can be found in the supporting information of our previous work<sup>2</sup>. The hydroxyl's pK<sub>a</sub> of **2** was determined to be 6.2, which deviates slightly from the value determined by ratiometric titration (pK<sub>a</sub> = 6.6). Compared to that, the values found for the hydroxyl's pK<sub>a</sub> of **4** even less by just 0.2 logarithmic units (pK<sub>a</sub> (titration) = 6.8; pK<sub>a</sub> (FCS) = 6.6).

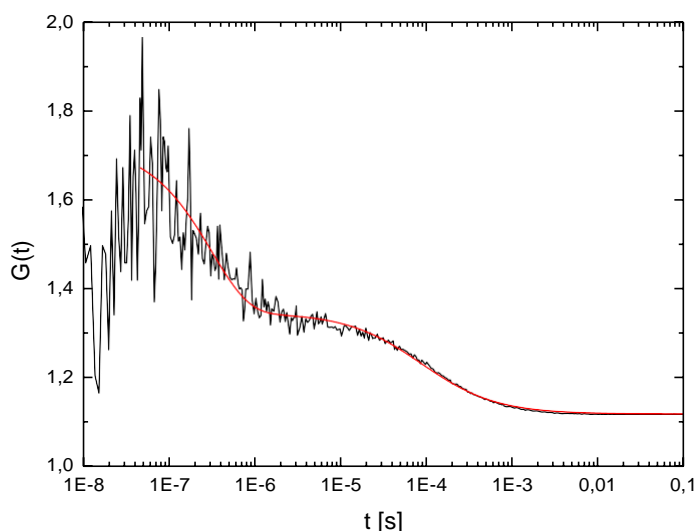

Figure S61: Normalized correlation function of **2**. Excitation was performed at  $\lambda = 488$  nm with a laser intensity of  $270 \text{ kW cm}^{-2}$  in a 20 mM citrate-buffer at pH 6.0. Fluorescence was detected at  $\lambda_{\text{det}} = 540\text{-}600$  nm. A pK<sub>a</sub> of 6.2 is calculated as a mean value of three measurements.

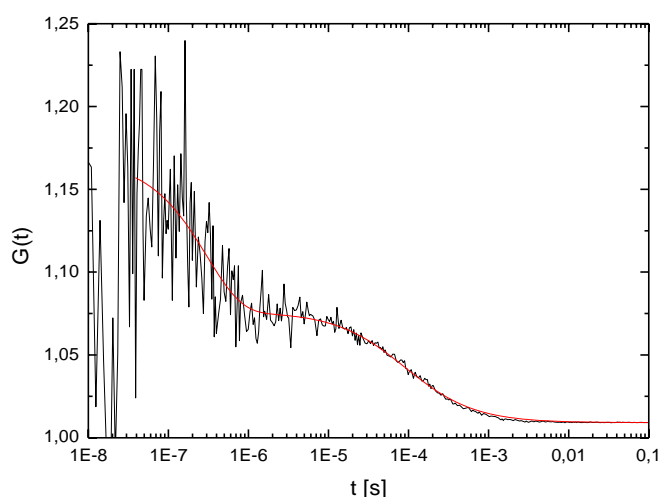

Figure S62: Normalized correlation function of **4**. Excitation was performed at  $\lambda = 488$  nm with a laser intensity of  $270 \text{ kW cm}^{-2}$  in a 20 mM citrate-buffer at pH 6.5. Fluorescence was detected at  $\lambda_{\text{det}} = 540\text{-}600$  nm. A pK<sub>a</sub> of 6.6 is calculated as a mean value of three measurements.

## Photostability

Photostability was evaluated by fluorescence correlation spectroscopy according the procedure reported by Hinkeldey *et al.*<sup>2,10</sup> Compared to the bleaching rates found for other pyrene based photoacids ( $\phi_{bl} \sim 300$  ppm), that of **2** and **4** (table 1 and 3 of the main manuscript, figure S63) are fivefold higher. As we have shown in that publication there is a distinct correlation of photostability and electron-withdrawing strength of the substituents at the aromatic core.<sup>2</sup> An explanation for the enhanced photobleaching rates might be that the carboxylic acid / ester are less electron-withdrawing than the sulfonamide/sulfonic ester groups of the derivatives we examined in our previous work. In contrast, the phosphorylated compounds **1** and **3** exhibit a much higher photostability (table S5, figure S63) in the range of that found for the above mentioned sulfonamide derivatives.<sup>2</sup> A possible reason is that the phosphate group has a stronger electron-withdrawing character ( $\sigma_p = 0.00$ )<sup>11</sup> than the deprotonated hydroxyl group ( $\sigma_p = -0.81$ ).<sup>11</sup> Nevertheless, all examined compounds (**1-4**) show sufficient photostability for *in vivo* fluorescence measurements.

Table S5: Evaluation of bleaching rates.

|                                 | $\sigma_{bl} / hv /$<br>$cm^2/kWs$ | $\sigma_{bl} / cm^2$  | $\epsilon /$<br>$L/mol/cm$ | $\sigma_{abs} / m^2$  | $\sigma_{abs} /$<br>$A^2$ | $\phi_{bl} / 1$       | $\phi_{bl} / ppm$ |
|---------------------------------|------------------------------------|-----------------------|----------------------------|-----------------------|---------------------------|-----------------------|-------------------|
| R110                            | 12.10                              | $4.93 \cdot 10^{-25}$ | 77000                      | $2.94 \cdot 10^{-20}$ | 2.94                      | $1.67 \cdot 10^{-05}$ | 16                |
| <b>2</b> , pH 11 <sup>[a]</sup> | 239                                | $9.74 \cdot 10^{-24}$ | 24900                      | $9.52 \cdot 10^{-21}$ | 0.95                      | $1.02 \cdot 10^{-03}$ | 1022              |
| <b>4</b> , pH 11 <sup>[a]</sup> | 221                                | $9.00 \cdot 10^{-24}$ | 16200                      | $6.19 \cdot 10^{-21}$ | 0.62                      | $1.45 \cdot 10^{-03}$ | 1453              |
| <b>1</b> , pH 11 <sup>[b]</sup> | 41                                 | $2.01 \cdot 10^{-24}$ | 19300                      | $7.38 \cdot 10^{-21}$ | 0.74                      | $2.73 \cdot 10^{-04}$ | 272               |
| <b>1</b> , pH 11 <sup>[a]</sup> | 32                                 | $1.57 \cdot 10^{-24}$ | 19300                      | $7.38 \cdot 10^{-21}$ | 0.74                      | $2.13 \cdot 10^{-04}$ | 212               |
| <b>3</b> , pH 7 <sup>[b]</sup>  | 36                                 | $1.77 \cdot 10^{-24}$ | 14500                      | $5.54 \cdot 10^{-21}$ | 0.55                      | $3.72 \cdot 10^{-04}$ | 318               |
| <b>3</b> , pH 3 <sup>[b]</sup>  | 86                                 | $4.22 \cdot 10^{-24}$ | 14500                      | $5.54 \cdot 10^{-21}$ | 0.55                      | $7.61 \cdot 10^{-04}$ | 761               |
| <b>3</b> , pH 3 <sup>[a]</sup>  | 85                                 | $4.17 \cdot 10^{-24}$ | 14500                      | $5.54 \cdot 10^{-21}$ | 0.55                      | $7.53 \cdot 10^{-04}$ | 752               |

$\lambda_{exc} = 488$  nm;  $h\nu = 4.07 \cdot 10^{-22}$  kJ

$\lambda_{exc} = 405$  nm;  $h\nu = 4.91 \cdot 10^{-22}$  kJ

<sup>[a]</sup> C-Apochromat, 63x/1.2 W Korr

<sup>[b]</sup> C-Apochromat, 40x/1.2 W Korr

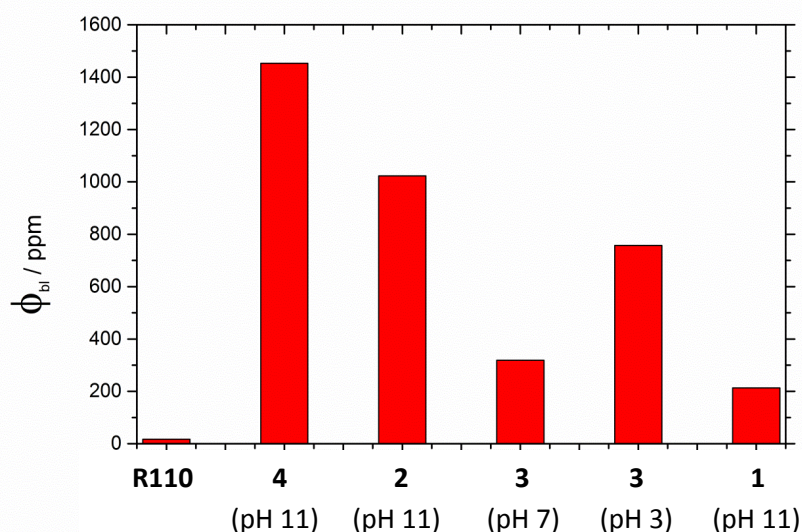

Figure S63: Photobleaching rates.

## Enzyme Kinetics

Fluorescence intensity at the reaction end points were defined as 100 % conversion and used to calculate the amount of converted product at a time. Fluorescence intensity at the maximal emission wavelength of the substrate at the starting point was assumed to be adequate to the substrate start concentration. The remaining emission at the observed wavelength after complete reaction was nearly 0, and considered to be complete substrate conversion. Only values under 10% substrate consumption were taken into account for the determination of the initial velocity by linear regression of the conversion over time. Red indicated points were excluded from linear regression. If not otherwise stated, enzyme kinetics were determined by this method.

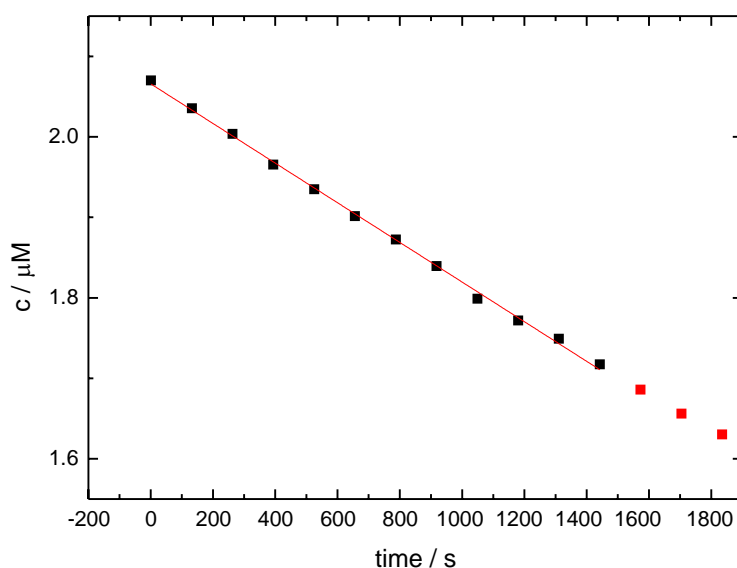

Figure S64: Concentration of substrate **1** over time.

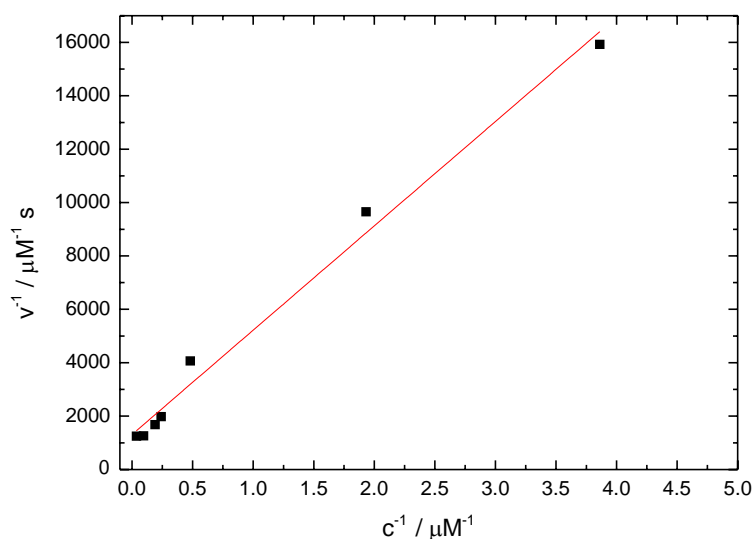

Figure S65: Reciprocal plot (Lineweaver-Burk) of initial velocity  $v$  of the hydrolysis of **1** versus different concentrations of substrate **1**.



### Substrate **1** + ALP (turn-on detection)

For turn-on detection the evolution of the product (**2**) emission band was monitored. When the fluorescence emission was the same for an hour, the reaction was assumed to be complete (100% conversion), and the signal was used to calculate the concentration of the formed product over time.

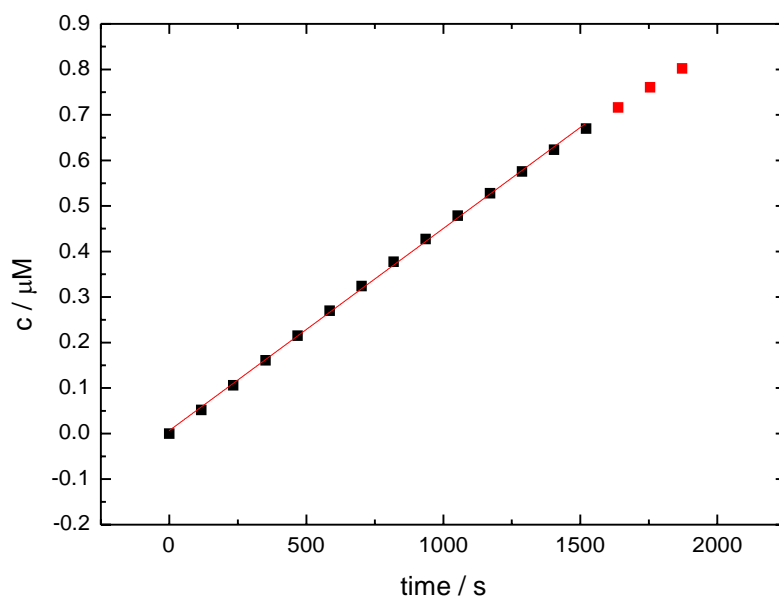

Figure S66: Formation of **2** by hydrolysis of substrate **1** over time.

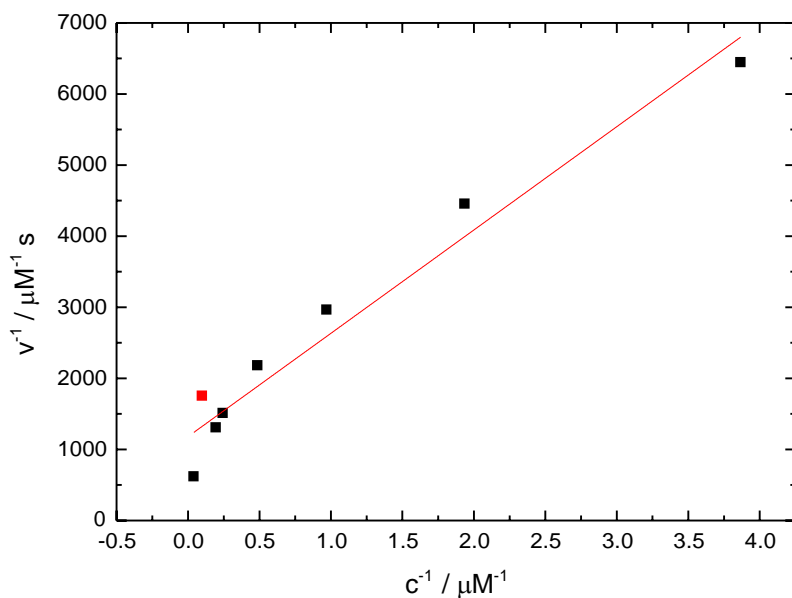

Figure S67: Reciprocal plot (Lineweaver-Burk) of initial velocity  $v$  of the hydrolysis of **1** versus different concentrations of substrate **1**, turn-on detection.

Compound **3** + AIP

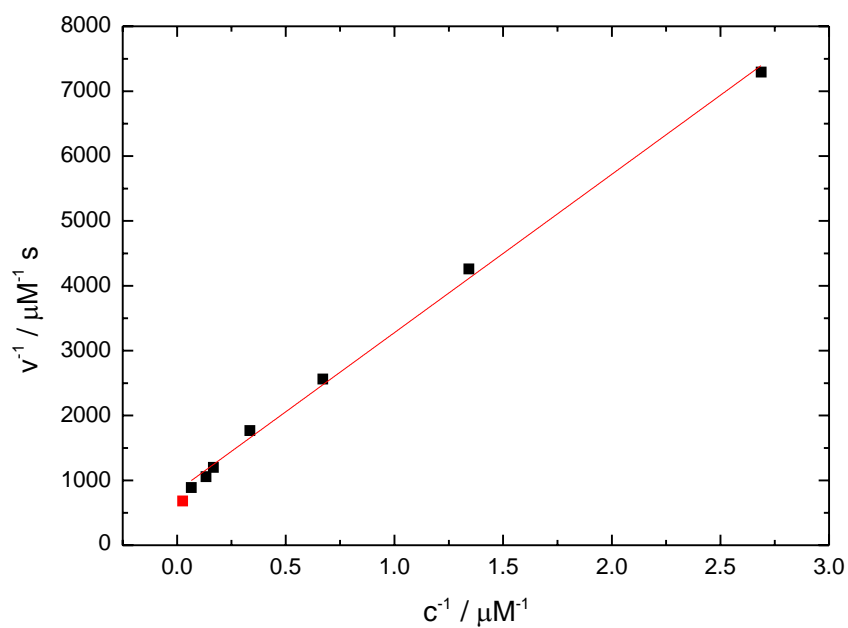

Figure S68: Reciprocal plot (Lineweaver-Burk) of initial velocity  $v$  of the hydrolysis of **3** versus different concentrations of substrate **3**.

4-Methylumbelliferyl phosphate + AIP (turn on detection)

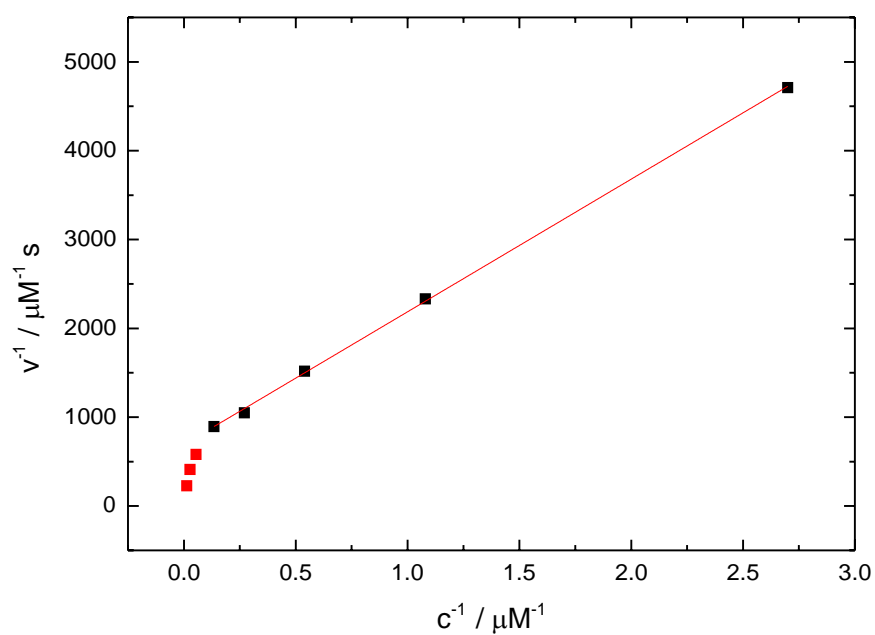

Figure S69: Reciprocal plot (Lineweaver-Burk) of initial velocity  $v$  of the hydrolysis of 4-MUP versus different concentrations of substrate 4-MUP.

Compound **1** + AP

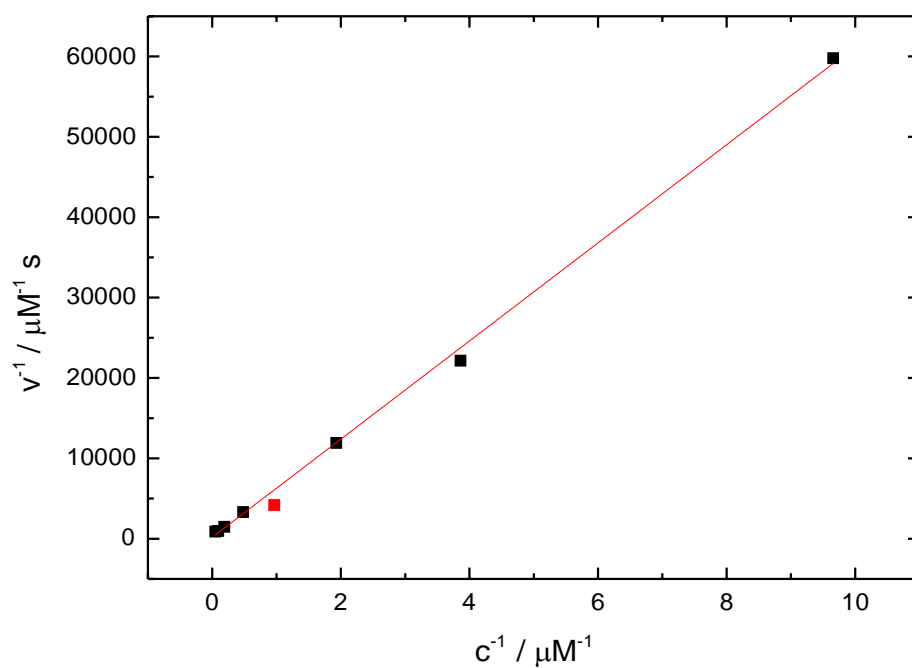

Figure S70: Reciprocal plot (Lineweaver-Burk) of initial velocity  $v$  of the hydrolysis of **1** versus different concentrations of substrate **1**.

Compound **3** + AP

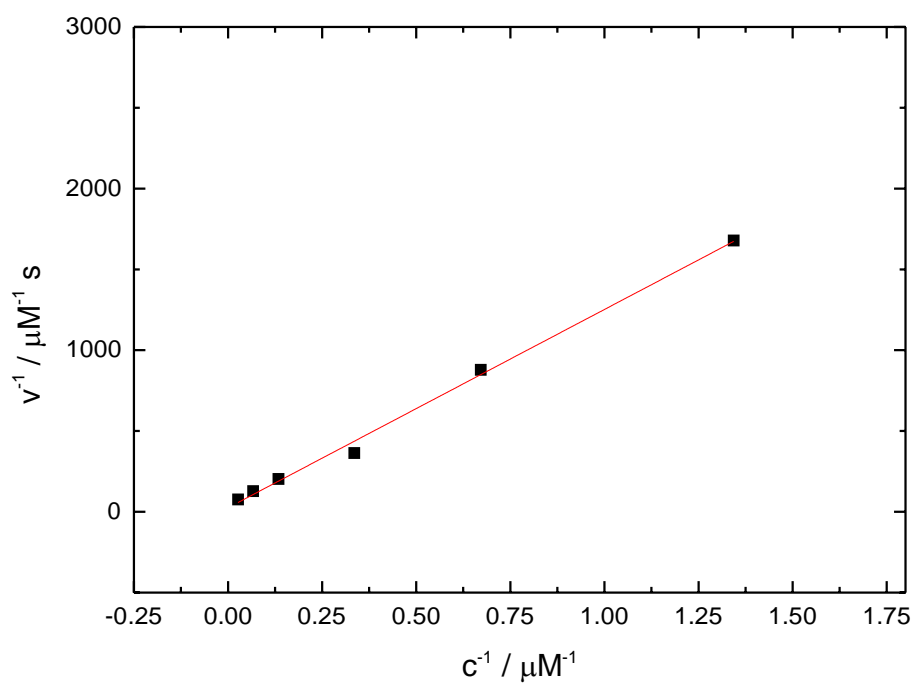

Figure S71: Reciprocal plot (Lineweaver-Burk) of initial velocity  $v$  of the hydrolysis of **3** versus different concentrations of substrate **3**.

Compound **2** + PLE

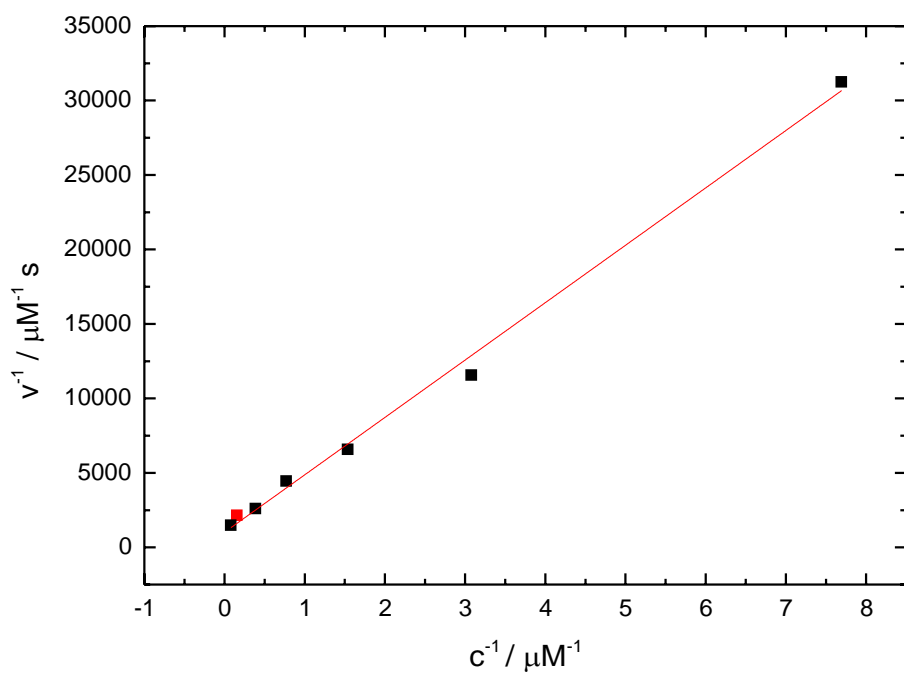

Figure S72: Reciprocal plot (Lineweaver-Burk) of initial velocity  $v$  of the hydrolysis of **2** versus different concentrations of substrate **2**.

4-Methylumbelliferyl butyrate + PLE (turn-on detection)

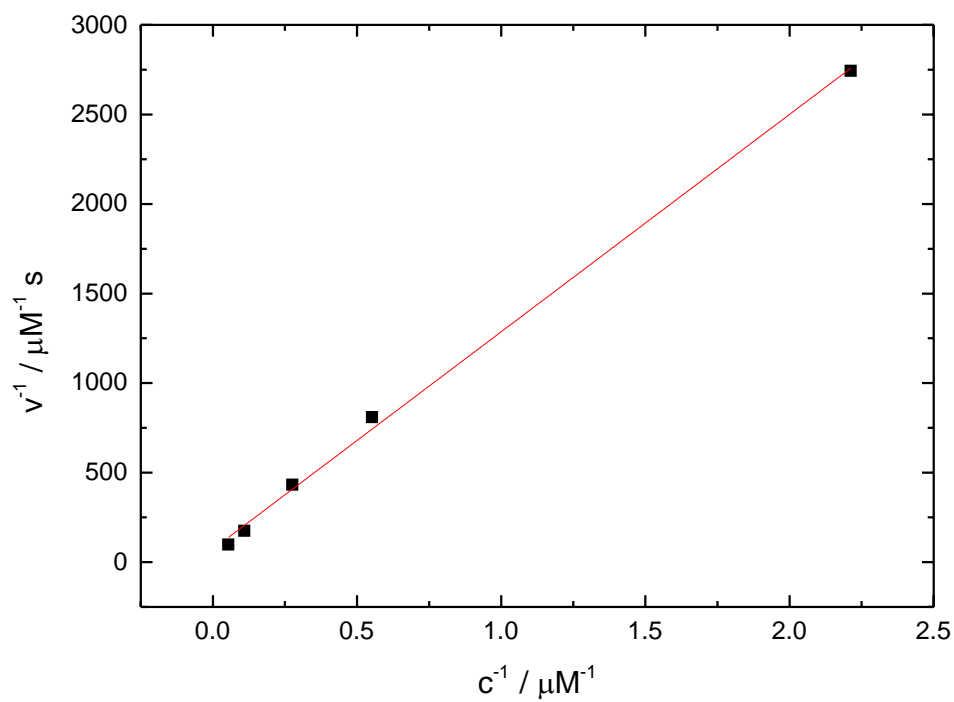

Figure-S73: Reciprocal plot (Lineweaver-Burk) of initial velocity  $v$  of the hydrolysis of 4-MUBu versus different concentrations of substrate 4-MUBu.

Table S6: Kinetic parameters for reactions of the dye system with different enzymes.

| <b>Compound</b>                      | <b>1</b>                    | <b>3</b>             | <b>4-MUP</b>         | <b>1</b>                | <b>3</b>             | <b>2</b>                      | <b>4-MUBu</b>        |
|--------------------------------------|-----------------------------|----------------------|----------------------|-------------------------|----------------------|-------------------------------|----------------------|
| <b>Enzyme</b>                        | <b>Alkaline Phosphatase</b> |                      |                      | <b>Acid Phosphatase</b> |                      | <b>Porcine Liver Esterase</b> |                      |
| $K_m$ [ $\mu\text{M}$ ]              | 3.0                         | 2.9                  | 2.2                  | 40.8                    | 48.6                 | 3.7                           | 16.9                 |
| $v_{\text{max}}$ [ $\mu\text{M/s}$ ] | $7.7 \times 10^{-4}$        | $1.2 \times 10^{-3}$ | $1.5 \times 10^{-3}$ | $6.7 \times 10^{-2}$    | $4.0 \times 10^{-2}$ | $9.5 \times 10^{-4}$          | $1.4 \times 10^{-2}$ |
| $k_{\text{cat}}$ [1/s]               | $2.1 \times 10^2$           | $3.3 \times 10^2$    | 39.2                 | $2.4 \times 10^{-2}$    | 1.9                  | $2.5 \times 10^{-2}$          | $9.7 \times 10^{-2}$ |
| $k_{\text{cat}}/K_m$ [1/M/s]         | $6.9 \times 10^8$           | $1.1 \times 10^8$    | $1.8 \times 10^7$    | $6.0 \times 10^2$       | $3.9 \times 10^4$    | $7.1 \times 10^3$             | $5.7 \times 10^3$    |

## Live Cell application

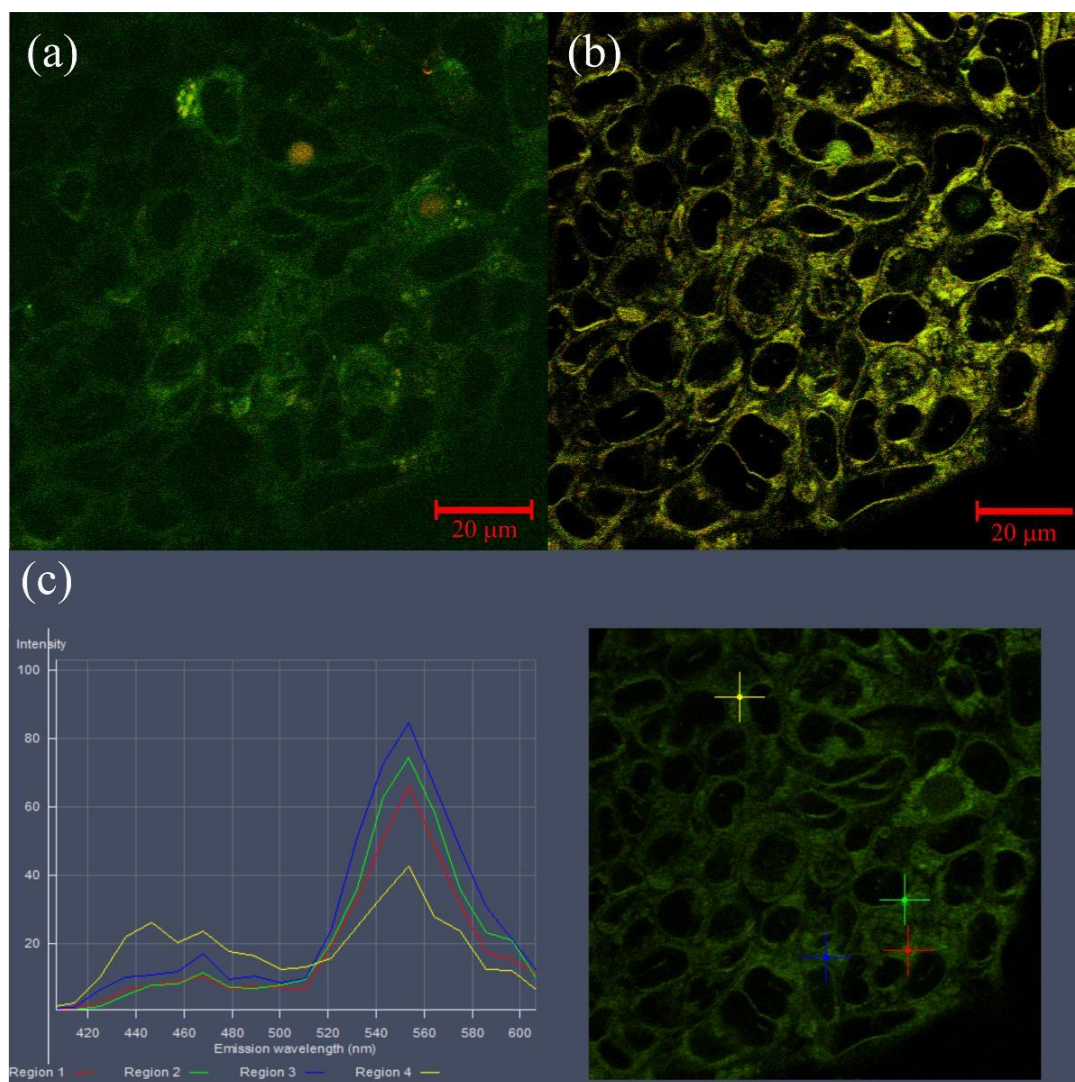

Figure S74: (a) T84 cells 3 hours after incubation, overlay, green channel:  $\lambda_{\text{det}} = 398\text{-}452$  nm (3), red channel:  $\lambda_{\text{det}} = 463\text{-}484$  nm (1); (b) Same conditions, green channel:  $\lambda_{\text{det}} = 516\text{-}548$  nm (4), red channel:  $\lambda_{\text{det}} = 559\text{-}612$  nm (2); (c) Same conditions, spectral analysis of different regions.

We were able to detect all possible products stemming from probe **1** in T84 cells by use of four different output filters. A faint fluorescence intensity in the spectral range from  $\lambda_{\text{det}} = 463\text{-}484$  nm (red channel, Figure S74(a)) indicates incorporated, but non-converted **1** in some areas of the cell cluster. While strong hydrolysis of **1** to **3** seems to be dependent of the region in the cluster (green channel, Figure S74(a)), dephosphorylation activity appears to be more evenly distributed (red channel, Figure S74(b)). However it seems that compound **3** is only formed in some individual cases. Fluorescence of **4**, similarly as that of **2**, appears without preferential areas of accumulation. Although **4** can be formed *in-vitro* by two different pathways (main manuscript Figure 1(b)), the ubiquitous appearance of **4** in the cell plasma indicates that the major pathway for its formation is via the evenly spread **2** and hence suggests, that the mentioned metabolic sequence **1**→**2**→**4** is also predominant in these T84 epithelial cells. The reconstructed spectra in Figure S74(c) from dispersed detection channels

unambiguously proved also the detection of **3** in selected areas. We conclude that the presented pyrenol based platform with orthogonal reactivities is appropriate for monitoring heterogeneity in cellular metabolic activity.

#### Incubation of L929 cells with dye **2**

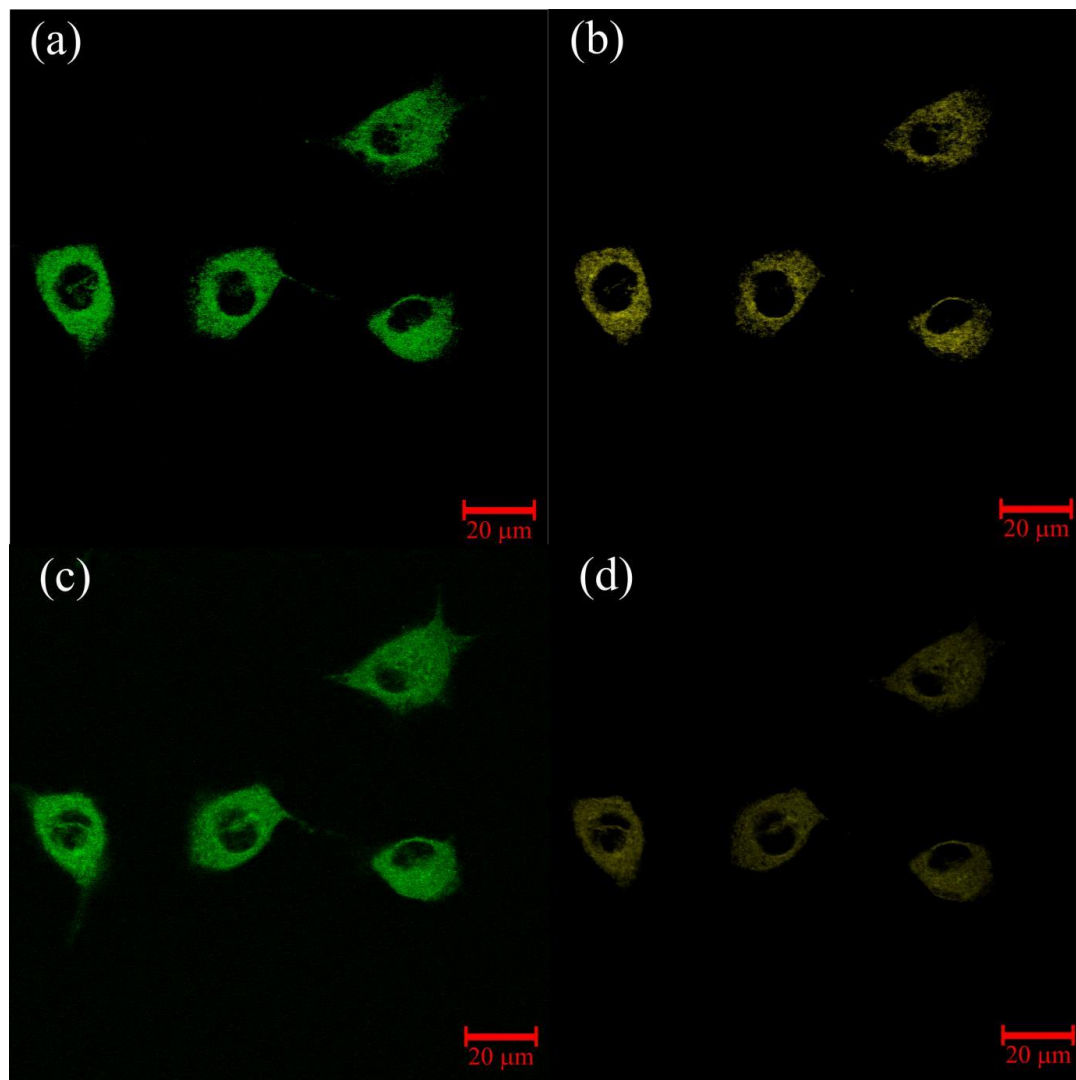

Figure S75: false colored L929 cells (a, b) 1 hour after incubation with **2**, green channel (a):  $\lambda_{\text{det}} = 516\text{-}548\text{ nm}$ , yellow channel (b):  $\lambda_{\text{det}} = 559\text{-}612\text{ nm}$ ; (c, d) same conditions after 3 hours.

Esterase activity can be monitored by use of substrate **2** dissolved in DMSO to limit the esterase monitoring on a single wavelength shift. After one hour of incubation with the dye, the uptake of the substrate was complete. As the emission ratio of substrate and product was about the same (Figure S75 (a, b)), the ratio shifts towards the emission of the hydrolyzed product (Figure S75 (c, d)).

In contrast, compounds **3** and **4** are not able to permeate into the cells (Figure S76/S77). Here just staining of the medium, outside the cell, is observed.



Incubation of L929 cells with dye 3

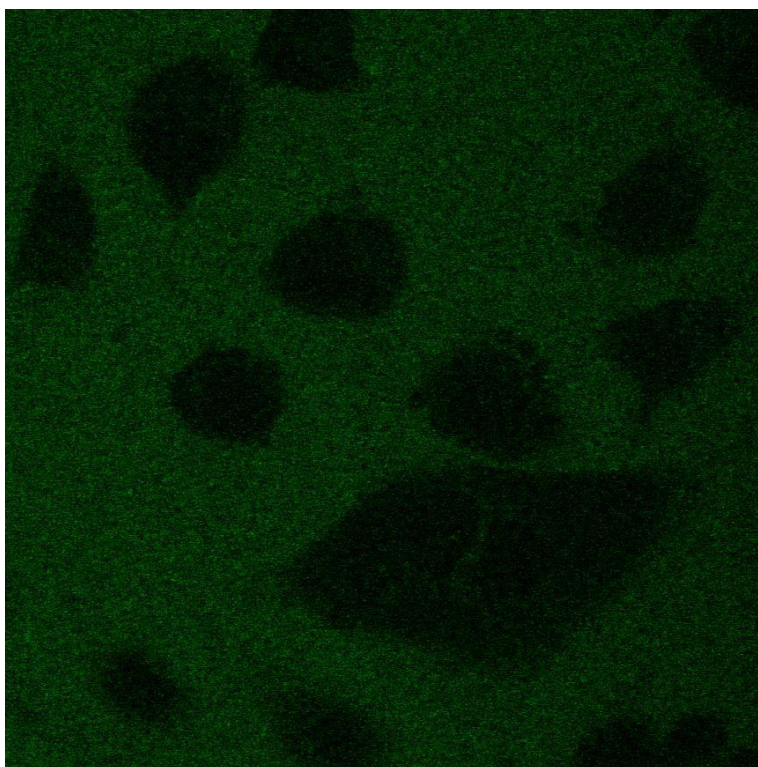

Figure S76: false colored L929 cells 24 hours after incubation with **3**.

Incubation of L929 cells with dye 4

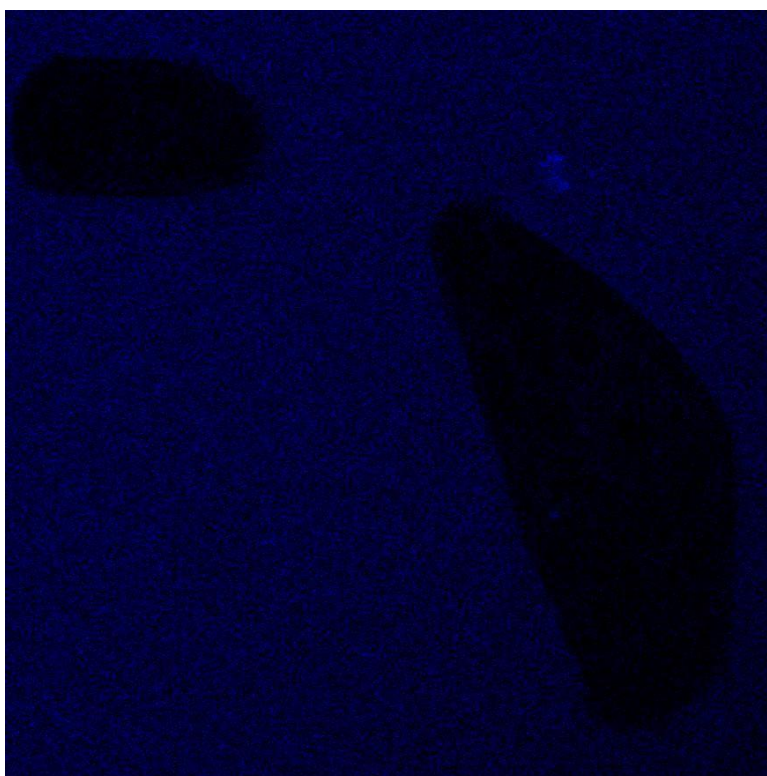

Figure S77: false colored L929 cells 24 hours after incubation with **4**.



## Molecular logic

### Compound 1

Excitation of the molecular logic systems with compound **1** was performed at  $\lambda_{\text{ex}} = 395$  and  $\lambda_{\text{ex}} = 460$  nm. The obtained spectra were summed up to give the spectra in Figure S78, S81- S92 and Figure 4 (a and b) of the main manuscript.

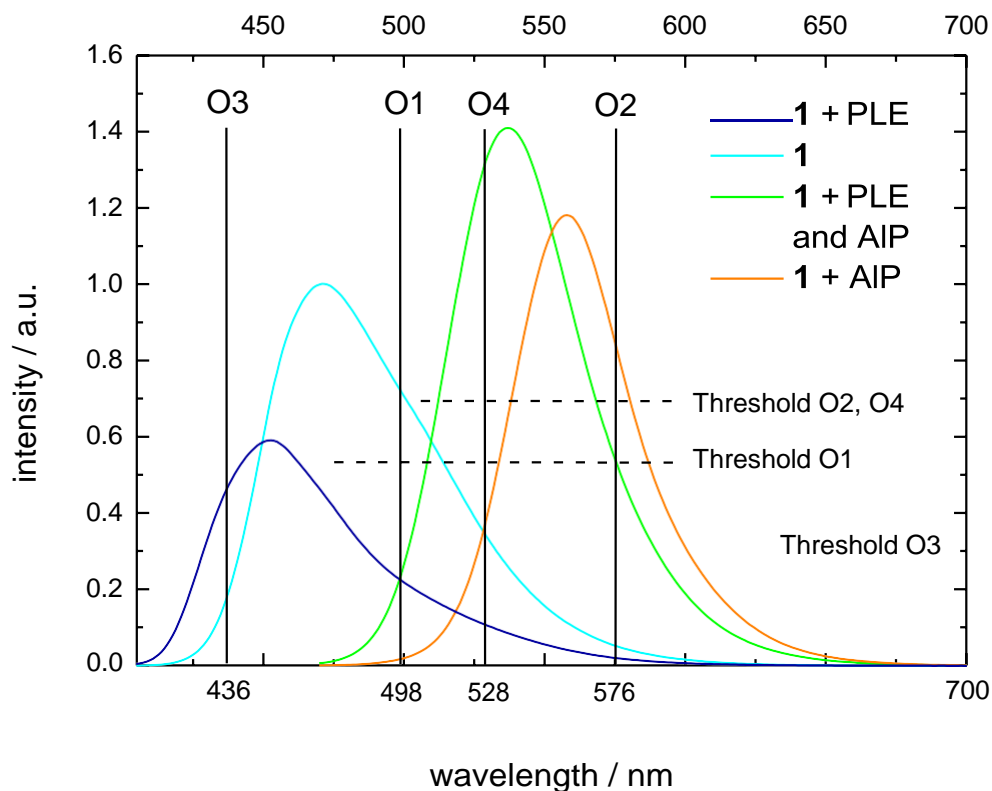

Figure S78: Fluorescence spectra (normalized to substrate fluorescence,  $\lambda_{\text{exc}} = 395$  and simultaneously 460 nm, as described above).

### 1:2 demultiplexer

Table S7: Truth table for 1:2 demultiplexer.

| In (AIP) | Ad (PLE) | O2 | O4 |
|----------|----------|----|----|
| 0        | 0        | 0  | 0  |
| 1        | 0        | 1  | 0  |
| 0        | 1        | 0  | 0  |
| 1        | 1        | 0  | 1  |

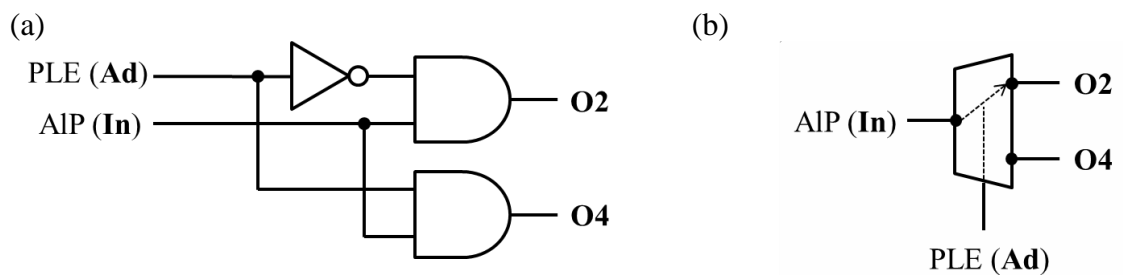

Figure S79: (a) Circuit diagram and (b) schematic switching operation of the described 1:2 demultiplexer.

## 2:4 decoder

Table S8: Truth table for 2:4 decoder.

| In1 (AIP) | In 2 (PLE) | O1<br>( $\lambda = 498 \text{ nm}$ ) | O2<br>( $\lambda = 576 \text{ nm}$ ) | O3<br>( $\lambda = 436 \text{ nm}$ ) | O4<br>( $\lambda = 528 \text{ nm}$ ) |
|-----------|------------|--------------------------------------|--------------------------------------|--------------------------------------|--------------------------------------|
| 0         | 0          | 1                                    | 0                                    | 0                                    | 0                                    |
| 1         | 0          | 0                                    | 1                                    | 0                                    | 0                                    |
| 0         | 1          | 0                                    | 0                                    | 1                                    | 0                                    |
| 1         | 1          | 0                                    | 0                                    | 0                                    | 1                                    |

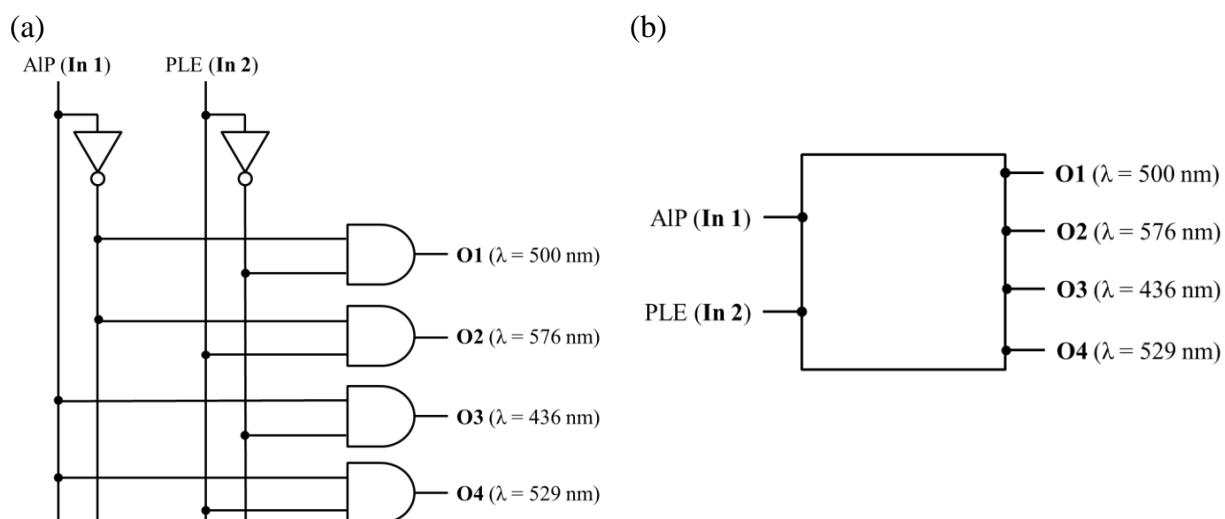

Figure S80: (a) Circuit diagram and (b) schematic switching operation of the described 2:4 decoder.

## NOR gate

Table S9: Truth table for NOR-Gate.

| In1 (AIP) | In 2 (PLE) | O1<br>( $\lambda = 498$ nm) |
|-----------|------------|-----------------------------|
| 0         | 0          | 1                           |
| 1         | 0          | 0                           |
| 0         | 1          | 0                           |
| 1         | 1          | 0                           |

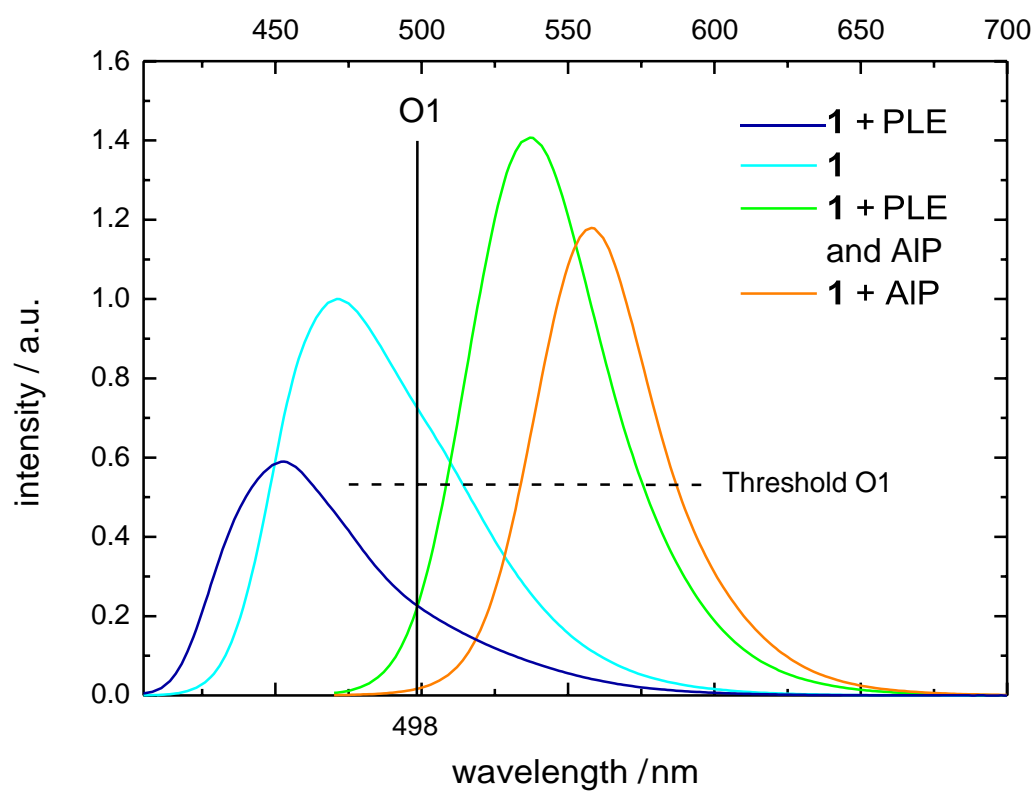

Figure S81: Fluorescence emission of **1** and its hydrolysis derivatives with corresponding output channel and threshold level for NOR gate.

## OR gate

Table S10: Truth table for OR-Gate as inversion of NOR gate (negative logic).

| In1 (AIP) | In 2 (PLE) | O1<br>( $\lambda = 498$ nm, negative logic) |
|-----------|------------|---------------------------------------------|
| 0         | 0          | 0                                           |
| 1         | 0          | 1                                           |
| 0         | 1          | 1                                           |
| 1         | 1          | 1                                           |

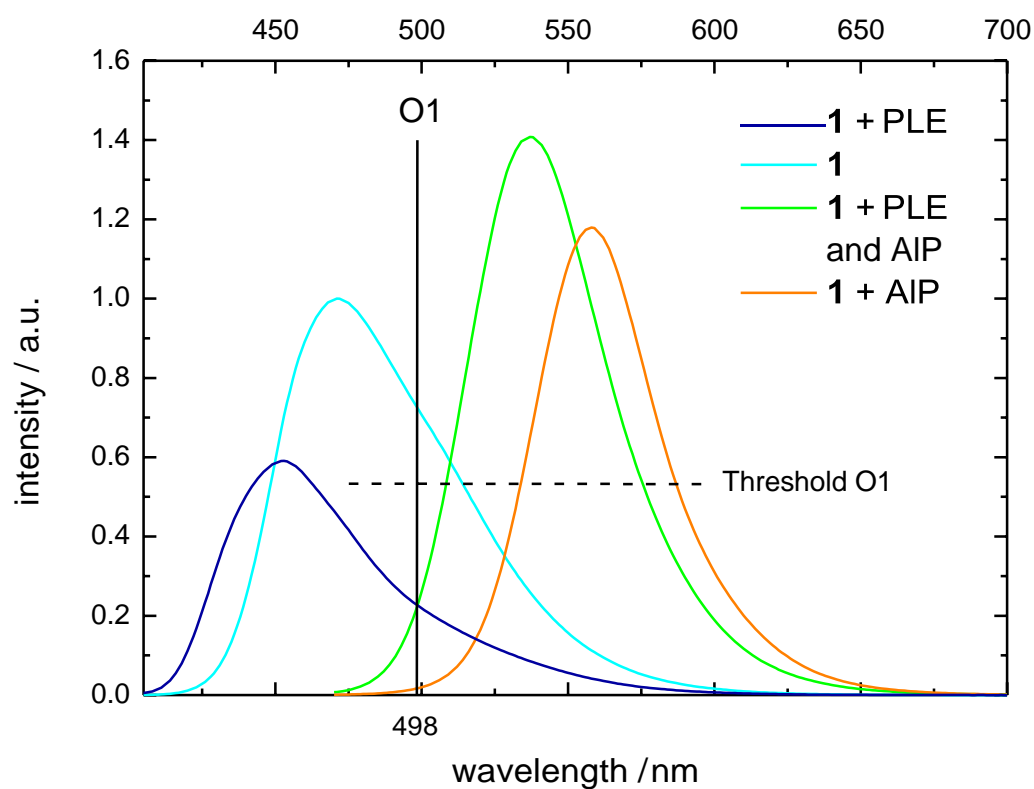

Figure S82: Fluorescence emission of **1** and its hydrolysis derivatives with corresponding output channel and threshold level for OR gate.

## INHIB 1 gate

Table S11: Truth table for INHIB 1 gate.

| In1 (AIP) | In 2 (PLE) | O2<br>( $\lambda = 576$ nm) |
|-----------|------------|-----------------------------|
| 0         | 0          | 0                           |
| 1         | 0          | 1                           |
| 0         | 1          | 0                           |
| 1         | 1          | 0                           |

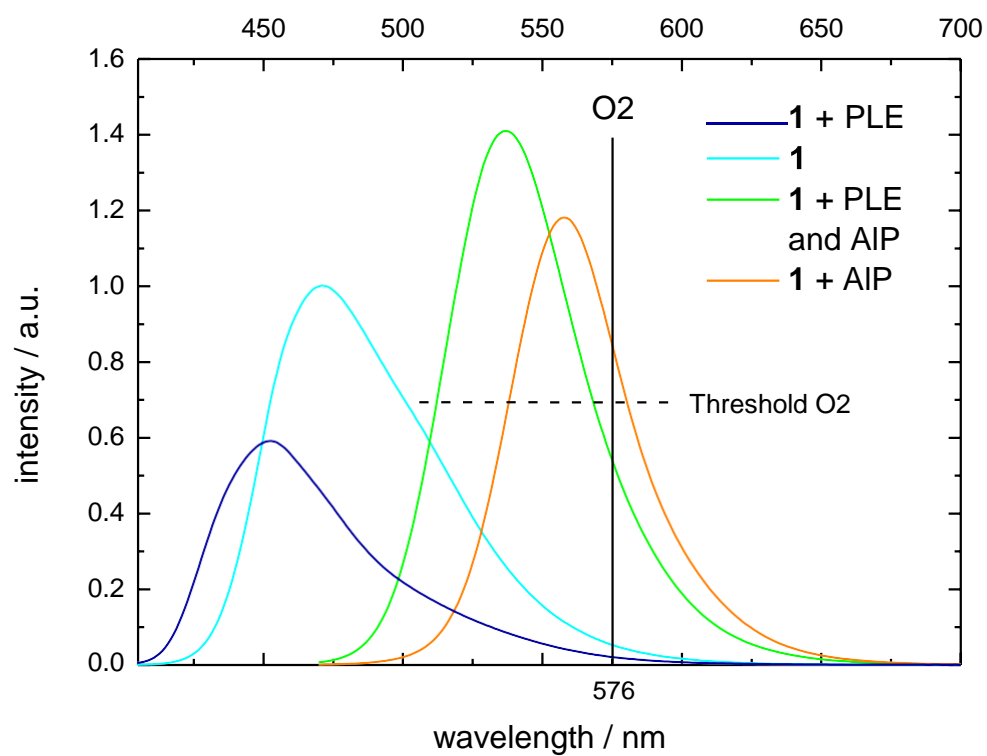

Figure S83: Fluorescence emission of **1** and its hydrolysis derivatives with corresponding output channel and threshold level for INHIB 1 gate.

## INHIB 2 gate

Table S12: Truth table for INHIB 2 gate.

| In1 (AIP) | In 2 (PLE) | O3<br>( $\lambda = 436$ nm) |
|-----------|------------|-----------------------------|
| 0         | 0          | 0                           |
| 1         | 0          | 0                           |
| 0         | 1          | 1                           |
| 1         | 1          | 0                           |

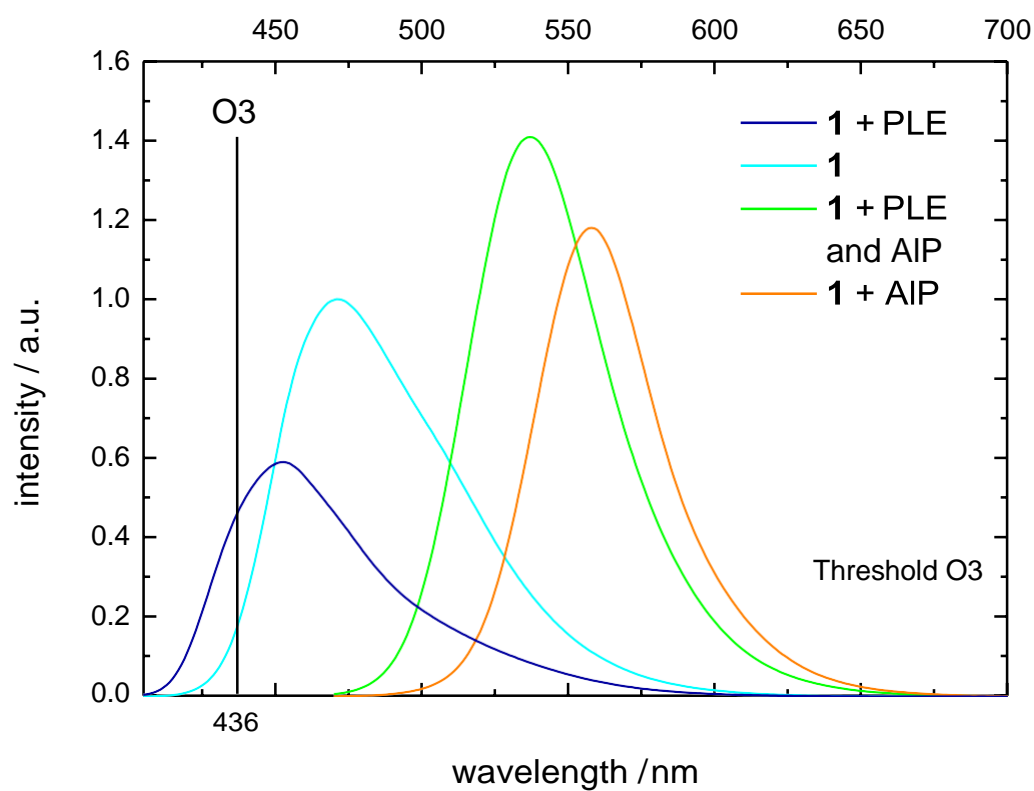

Figure S84: Fluorescence emission of **1** and its hydrolysis derivatives with corresponding output channel and threshold level for INHIB 2 gate.

## AND gate

Table S13: Truth table for AND gate.

| In1 (AIP) | In 2 (PLE) | O4<br>( $\lambda = 528$ nm) |
|-----------|------------|-----------------------------|
| 0         | 0          | 0                           |
| 1         | 0          | 0                           |
| 0         | 1          | 0                           |
| 1         | 1          | 1                           |

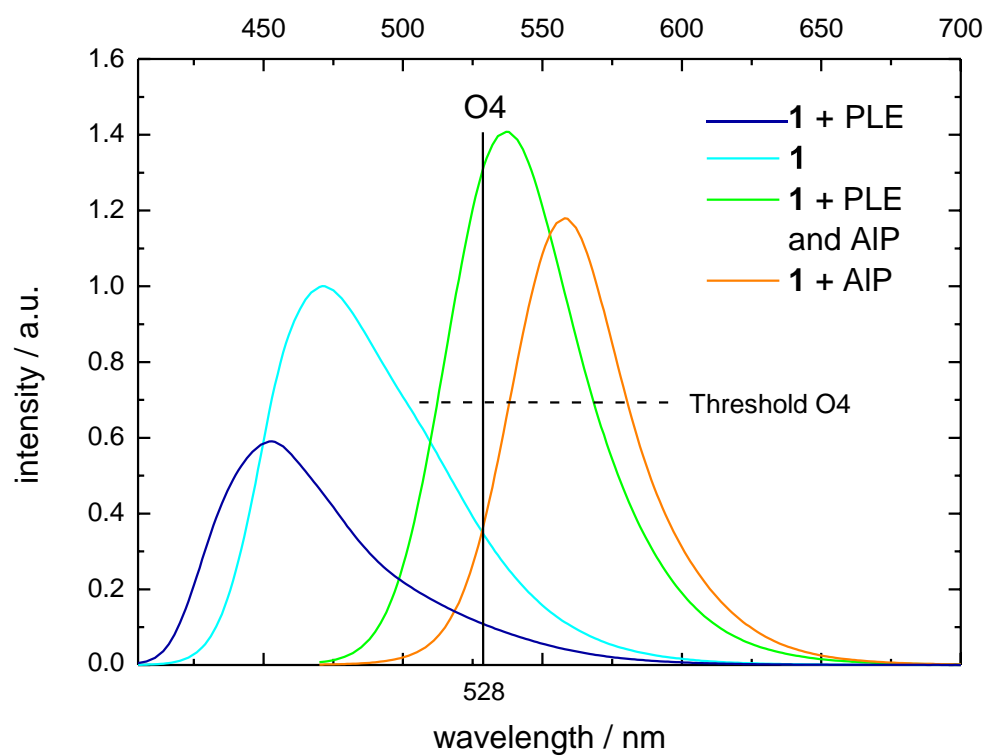

Figure S85: Fluorescence emission of **1** and its hydrolysis derivatives with corresponding output channel and threshold level for AND gate.

## NAND gate

Table S14: Truth table for NAND-Gate as inversion of AND gate (negative logic).

| In1 (AIP) | In 2 (PLE) | O4<br>( $\lambda = 528$ nm, negative logic) |
|-----------|------------|---------------------------------------------|
| 0         | 0          | 1                                           |
| 1         | 0          | 1                                           |
| 0         | 1          | 1                                           |
| 1         | 1          | 0                                           |

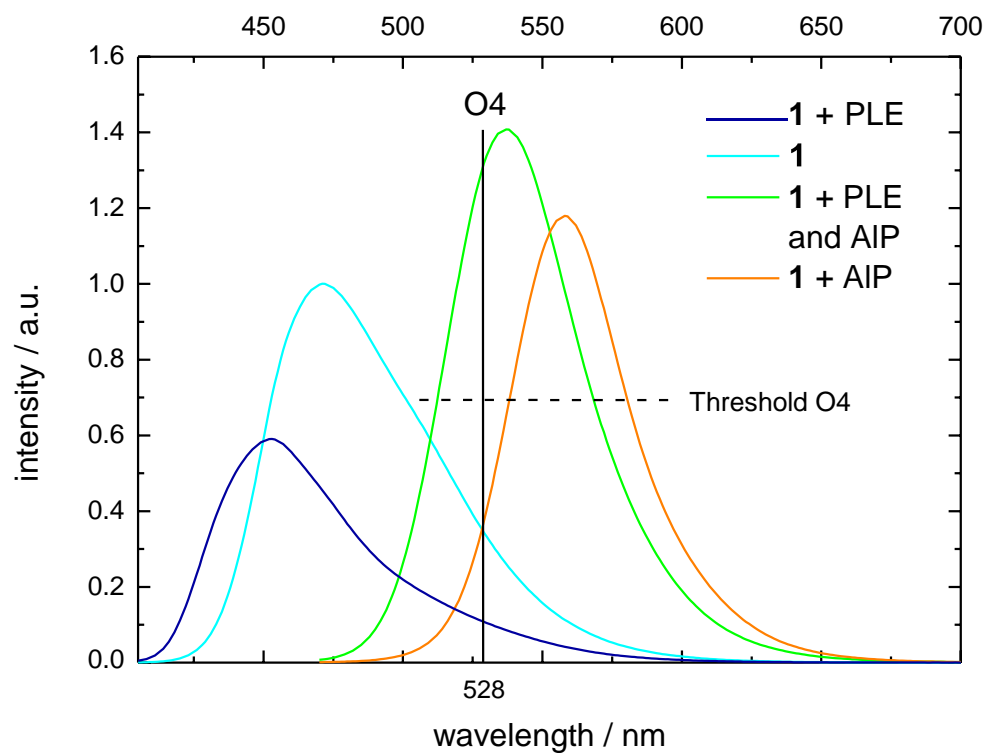

Figure S86: Fluorescence emission of **1** and its hydrolysis derivatives with corresponding output channel and threshold level for NAND gate.



## TRANSFER gate

Table S15: Truth table for transfer gate.

| In1 (AIP) | In 2 (PLE) | O5<br>( $\lambda = 553$ nm) |
|-----------|------------|-----------------------------|
| 0         | 0          | 0                           |
| 1         | 0          | 1                           |
| 0         | 1          | 0                           |
| 1         | 1          | 1                           |

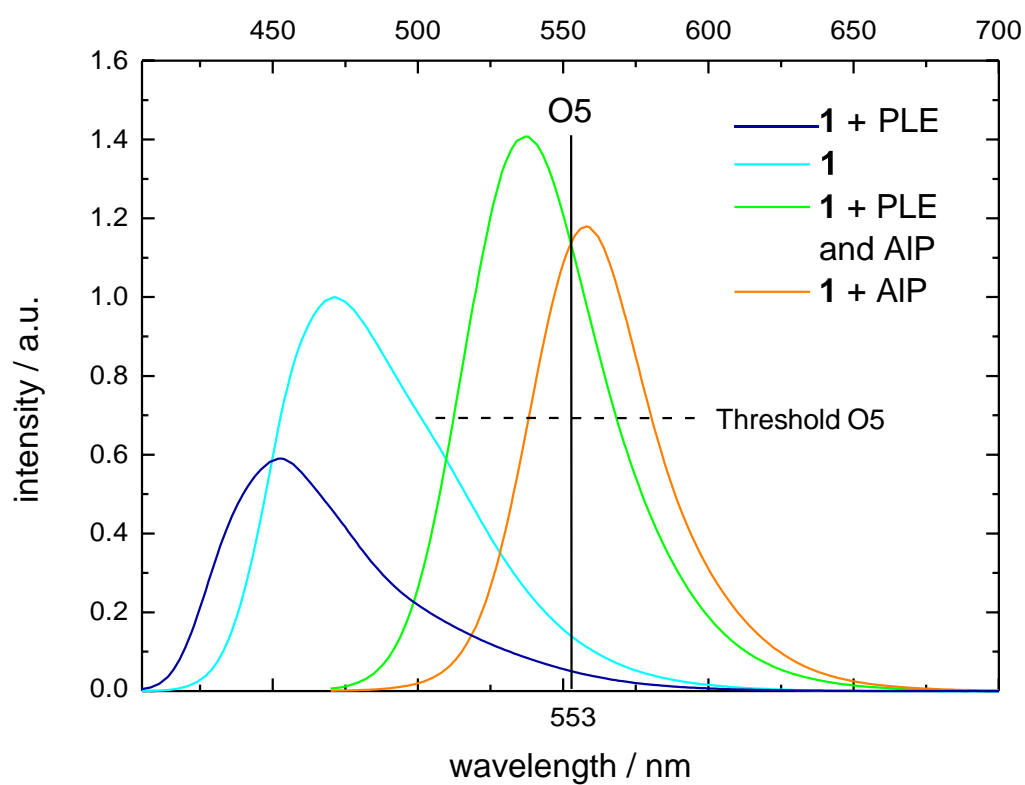

Figure S87: Fluorescence emission of **1** and its hydrolysis derivatives with corresponding output channel and threshold level for transfer gate.

## XNOR gate

Table S16: Truth table for **XNOR** gate.

| In1 (AIP) | In 2 (PLE) | O6<br>( $\lambda = 509$ nm) |
|-----------|------------|-----------------------------|
| 0         | 0          | 1                           |
| 1         | 0          | 0                           |
| 0         | 1          | 0                           |
| 1         | 1          | 1                           |

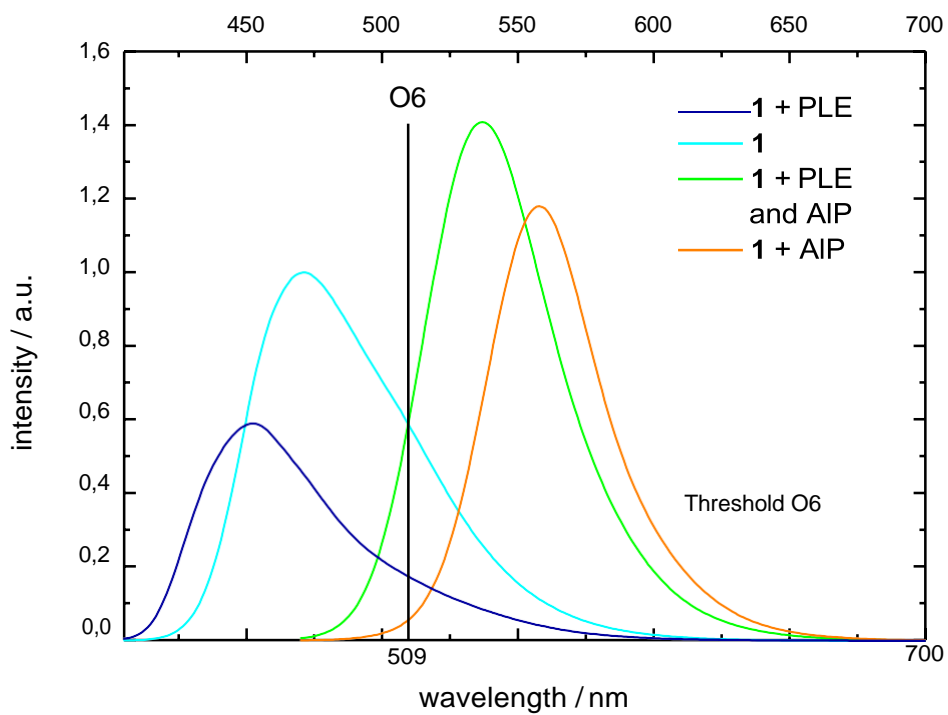

Figure S88: Fluorescence emission of **1** and its hydrolysis derivatives with corresponding output channel and threshold level for XNOR gate.

## XOR gate

Table S17: Truth table for **XOR** gate as inversion of XNOR gate.

| In1 (AIP) | In 2 (PLE) | O6<br>( $\lambda = 509$ nm, negative logic) |
|-----------|------------|---------------------------------------------|
| 0         | 0          | 0                                           |
| 1         | 0          | 1                                           |
| 0         | 1          | 1                                           |
| 1         | 1          | 0                                           |

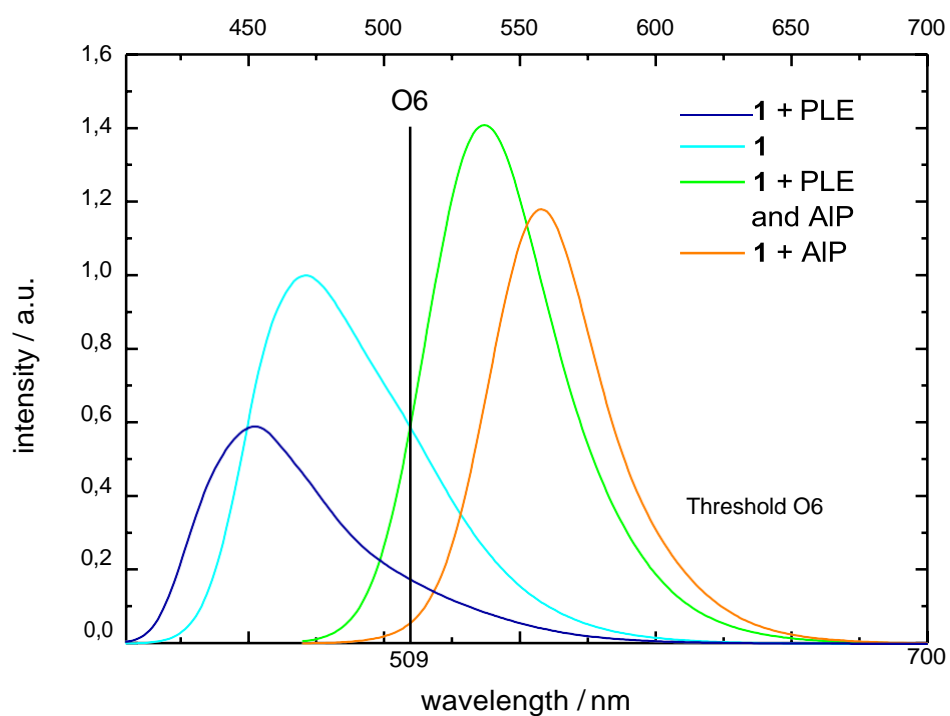

Figure S89: Fluorescence emission of **1** and its hydrolysis derivatives with corresponding output channel and threshold level for XOR gate.

# Half-adder

Table S18: Truth table for half-adder.

| In1 (AIP) | In2 (PLE) | O4<br>( $\lambda = 528$ nm) | O6<br>( $\lambda = 509$ nm,<br>negative logic) |
|-----------|-----------|-----------------------------|------------------------------------------------|
| 0         | 0         | 0                           | 0                                              |
| 1         | 0         | 0                           | 1                                              |
| 0         | 1         | 0                           | 1                                              |
| 1         | 1         | 1                           | 0                                              |

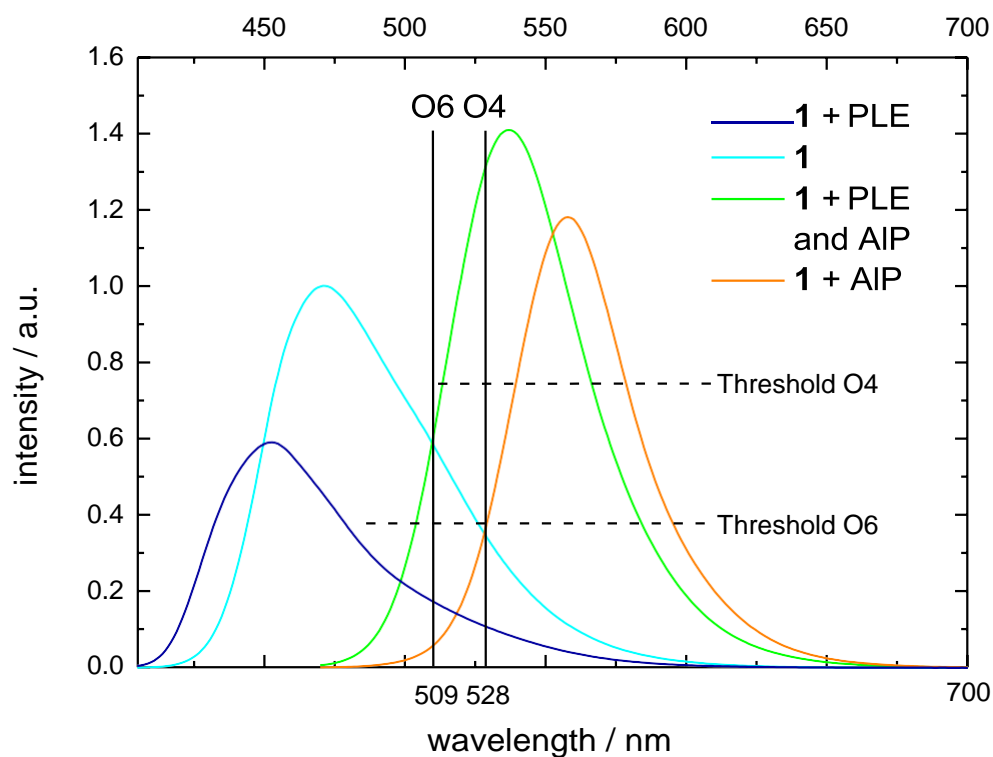

Figure S90: Fluorescence emission of **1** and its hydrolysis derivatives with corresponding output channel and threshold level for half-adder.

# Half-subtractor

Table S19: Truth table for half-subtractor.

| In1 (AIP) | In2 (PLE) | O3<br>( $\lambda = 436$ nm) | O6<br>( $\lambda = 509$ nm,<br>negative logic) |
|-----------|-----------|-----------------------------|------------------------------------------------|
| 0         | 0         | 0                           | 0                                              |
| 1         | 0         | 0                           | 1                                              |
| 0         | 1         | 1                           | 1                                              |
| 1         | 1         | 0                           | 0                                              |

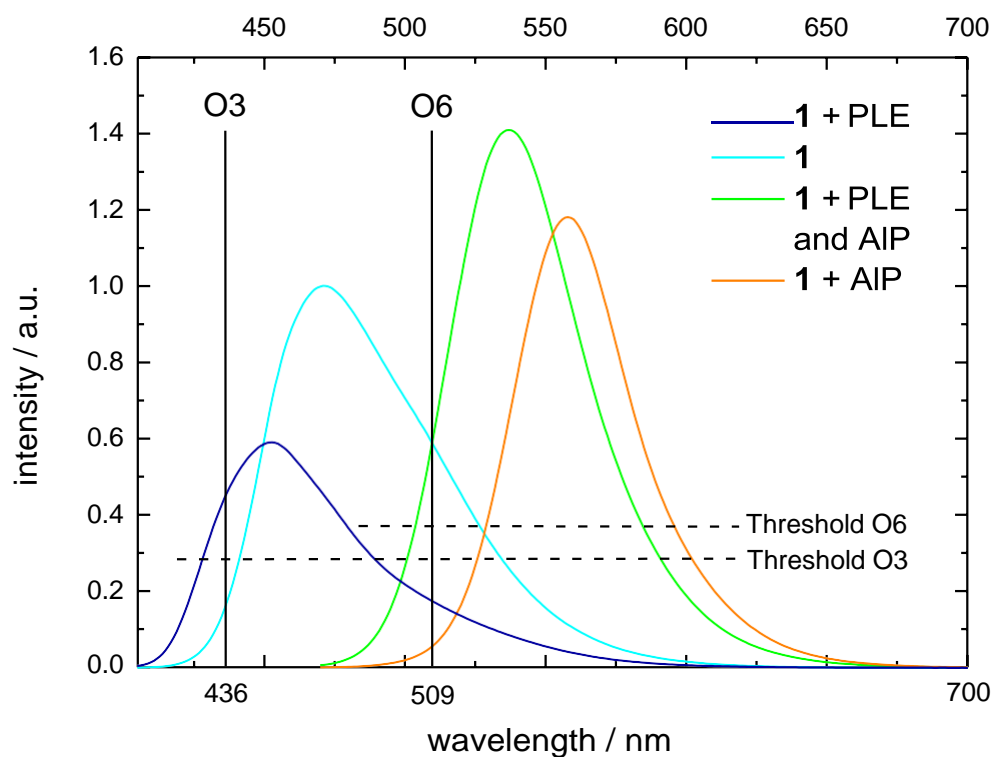

Figure S91: Fluorescence emission of **1** and its hydrolysis derivatives with corresponding output channel and threshold level for half-subtractor.

## Feynman gate

Table S20: Truth table for Feynman gate.

| In1 (AIP) | In 2 (PLE) | O5<br>( $\lambda = 553$ nm) | O6<br>( $\lambda = 509$ nm, negative logic) |
|-----------|------------|-----------------------------|---------------------------------------------|
| 0         | 0          | 0                           | 0                                           |
| 1         | 0          | 1                           | 1                                           |
| 0         | 1          | 0                           | 1                                           |
| 1         | 1          | 1                           | 0                                           |

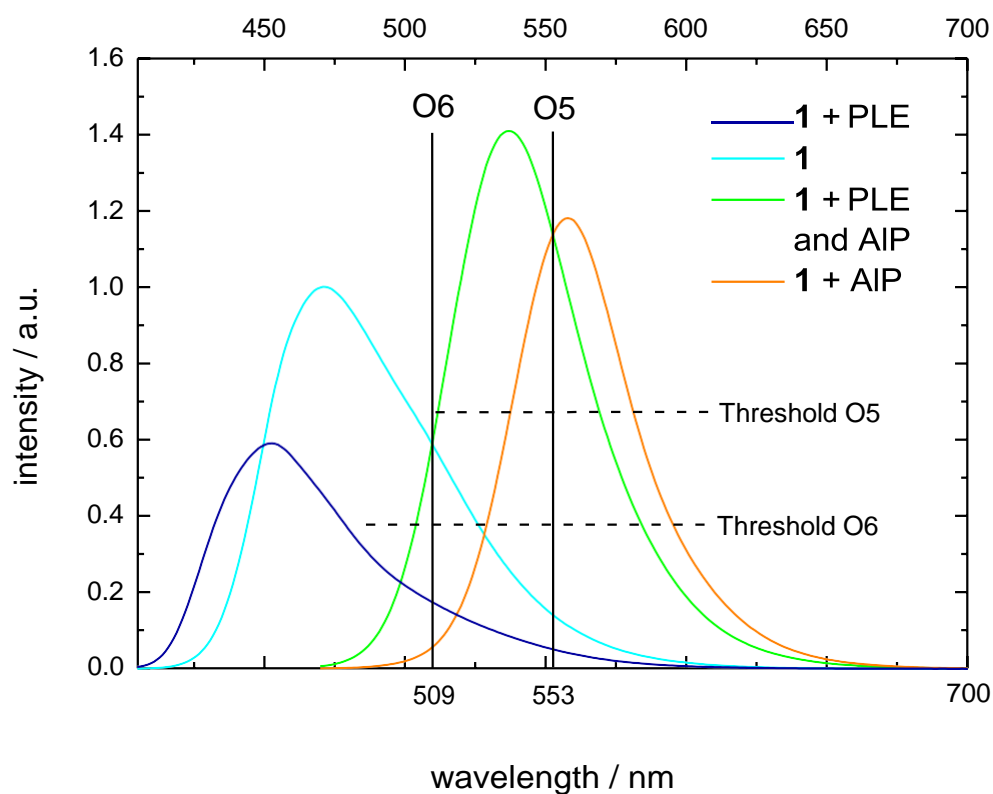

Figure S92: Fluorescence emission of **1** and its hydrolysis derivatives with corresponding output channel and threshold level for Feynman gate.

## Molecular Keypad Lock

Table S21: Truth table for Molecular Keypad Lock.

| 1. Input | 2. Input | 3. Input | O7<br>( $\lambda = 536 \text{ nm}$ ) |
|----------|----------|----------|--------------------------------------|
| A        | B        | C        | 1                                    |
| A        | C        | B        | 0                                    |
| B        | A        | C        | 0                                    |
| B        | C        | A        | 0                                    |
| C        | A        | B        | 0                                    |
| C        | B        | A        | 0                                    |

A: Acid Phosphatase (AP); B: KOH; C:  $\lambda_{\text{ex}}$

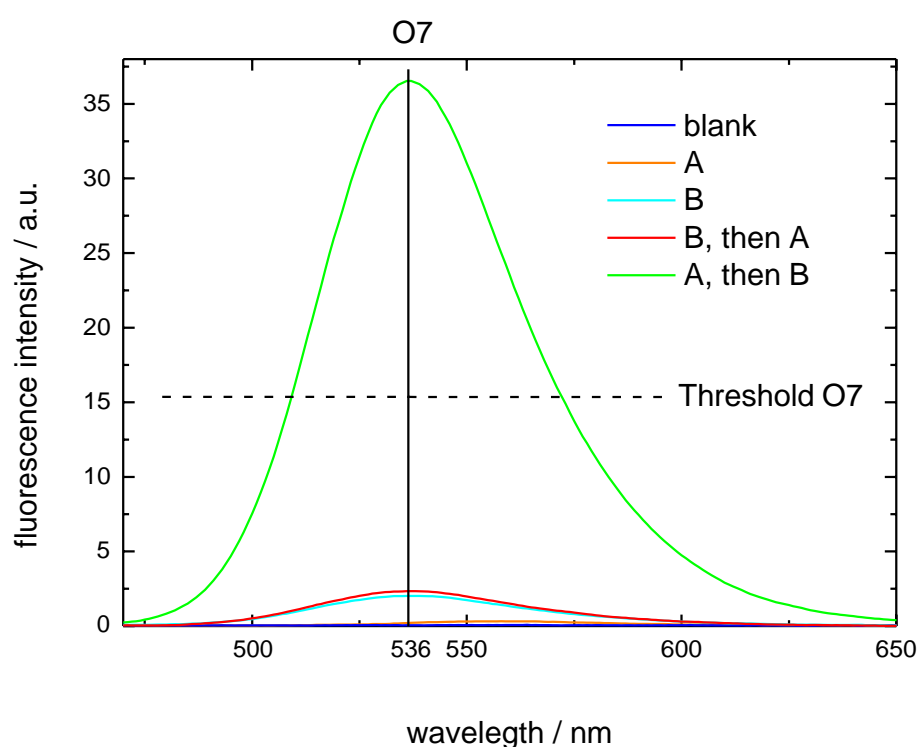

Figure S93: Fluorescence emission of **1** after several addition sequences with corresponding output channel and threshold level for molecular keypad lock.

A molecular keypad lock can be mimicked by use of acid phosphatase (A), KOH (B) and excitation light (C) as inputs (Table S21, Figure S93). In the initial state of the system, the pH is defined by the added acetic acid. At the pH of  $\sim 5$ , the activity of the acid phosphatase is high. After 6 minutes, the phosphate group is hydrolyzed by the enzyme and KOH is added to cleave the carboxylic ester to yield compound **4**. After additional 6 minutes, fluorescence at **O7** and thus a positive feedback of the keypad lock is only generated, when the excitation light is introduced into the system. Any interchange in the input sequence thus produces no signal above the corresponding threshold (Figure S93), as the KOH shifts the solution to a highly basic pH, where the enzymatic activity is very low. Furthermore, if compound **4** is not generated by the system, the excitation light at  $\lambda_{\text{ex}} = 460 \text{ nm}$  naturally does not yield fluorescence emission at **O7**. Hence there is just one input sequence ( $A \rightarrow B \rightarrow C$ ) that sets this device to “on”.

## Compound 4

base as Input, Initial state:  $\text{pH} < 0$

### XOR gate

Table S22: Truth table for XOR gate.

| In I ( $\text{OH}^-$ ) | In II ( $\text{OH}^-$ ) | O III<br>( $\lambda = 569 \text{ nm}$ ) |
|------------------------|-------------------------|-----------------------------------------|
| 0                      | 0                       | 0                                       |
| 1                      | 0                       | 1                                       |
| 0                      | 1                       | 1                                       |
| 1                      | 1                       | 0                                       |

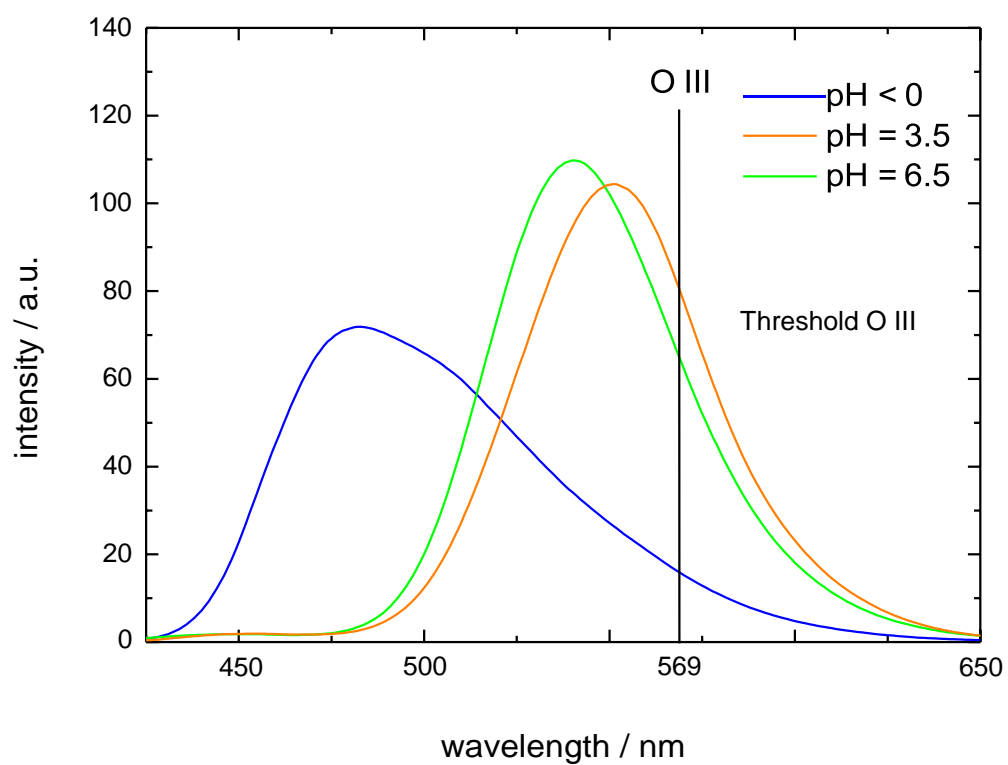

Figure S94: Fluorescence emission of **4** at different pH values with corresponding output channel and threshold level for XOR gate.



## AND gate

Table S23: Truth table for AND gate.

| In I (OH <sup>-</sup> ) | In I (OH <sup>-</sup> ) | O IV<br>( $\lambda = 524$ nm) |
|-------------------------|-------------------------|-------------------------------|
| 0                       | 0                       | 0                             |
| 1                       | 0                       | 0                             |
| 0                       | 1                       | 0                             |
| 1                       | 1                       | 1                             |

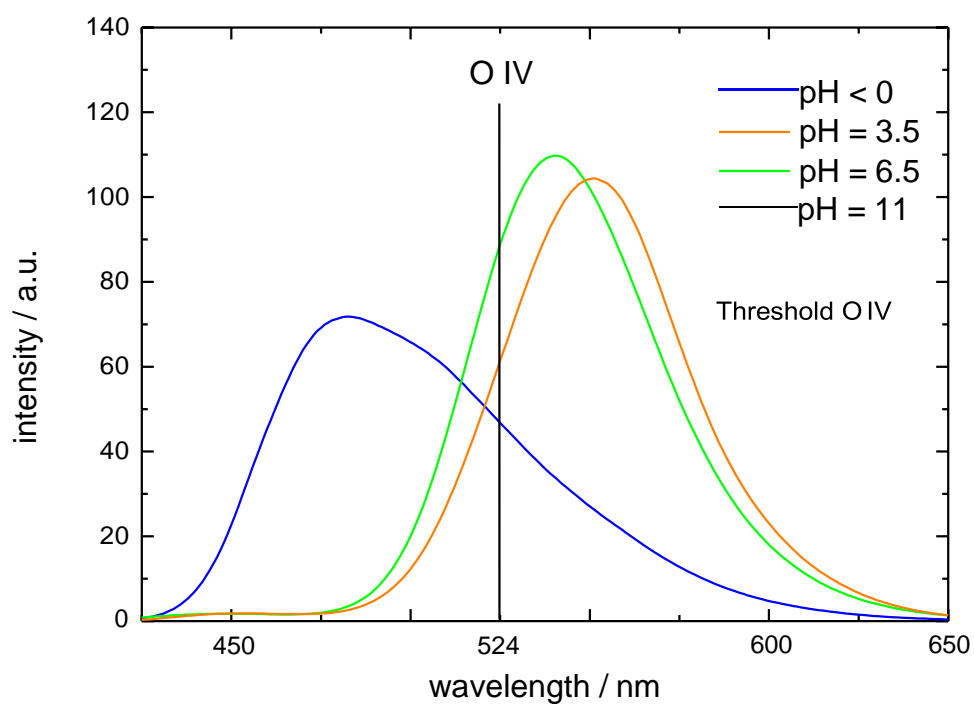

Figure S95: Fluorescence emission of **4** at different pH values with corresponding output channel and threshold level for AND gate.

## OR gate

Table S24: Truth table for OR gate.

| In I (OH <sup>-</sup> ) | In II (OH <sup>-</sup> ) | O II<br>( $\lambda = 548$ nm) |
|-------------------------|--------------------------|-------------------------------|
| 0                       | 0                        | 0                             |
| 1                       | 0                        | 1                             |
| 0                       | 1                        | 1                             |
| 1                       | 1                        | 1                             |

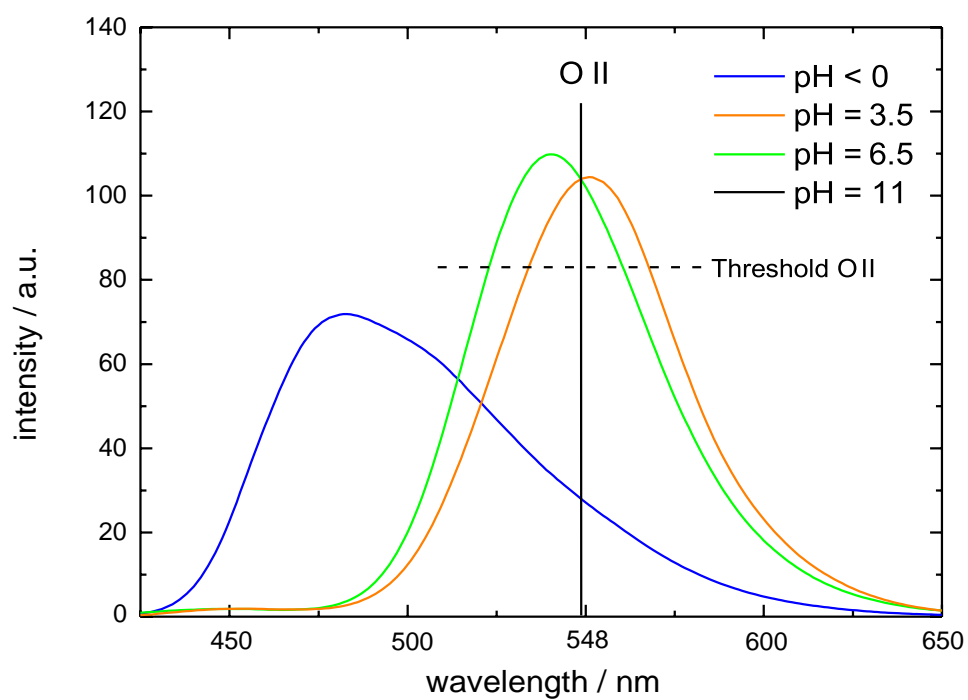

Figure S96: Fluorescence emission of **4** at different pH values with corresponding output channel and threshold level for OR gate.

base as Input, Initial state: pH = 3.5

**NAND** gate

Table S25: Truth table for NAND gate.

| In I (OH <sup>-</sup> ) | In II (OH <sup>-</sup> ) | O II<br>( $\lambda = 548$ nm) |
|-------------------------|--------------------------|-------------------------------|
| 0                       | 0                        | 1                             |
| 1                       | 0                        | 1                             |
| 0                       | 1                        | 1                             |
| 1                       | 1                        | 0                             |

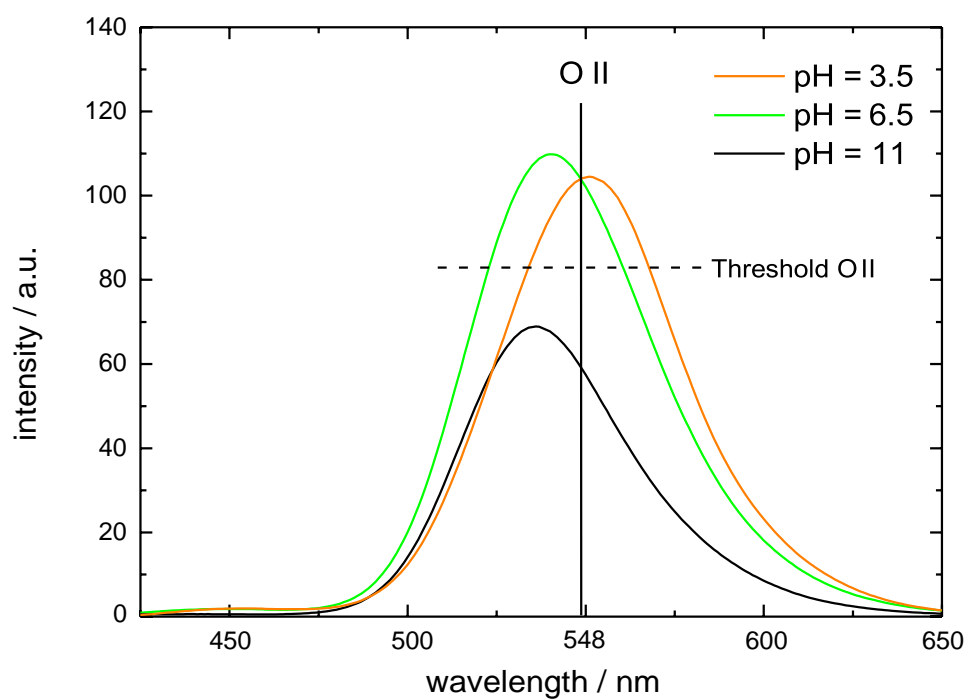

Figure S97: Fluorescence emission of **4** at different pH values with corresponding output channel and threshold level for NAND gate.

## XNOR gate

Table S26: Truth table for XNOR gate as inversion of a XOR gate.

| In I (OH <sup>-</sup> ) | In II (OH <sup>-</sup> ) | O I<br>( $\lambda = 514$ nm, negative logic) |
|-------------------------|--------------------------|----------------------------------------------|
| 0                       | 0                        | 1                                            |
| 1                       | 0                        | 0                                            |
| 0                       | 1                        | 0                                            |
| 1                       | 1                        | 1                                            |

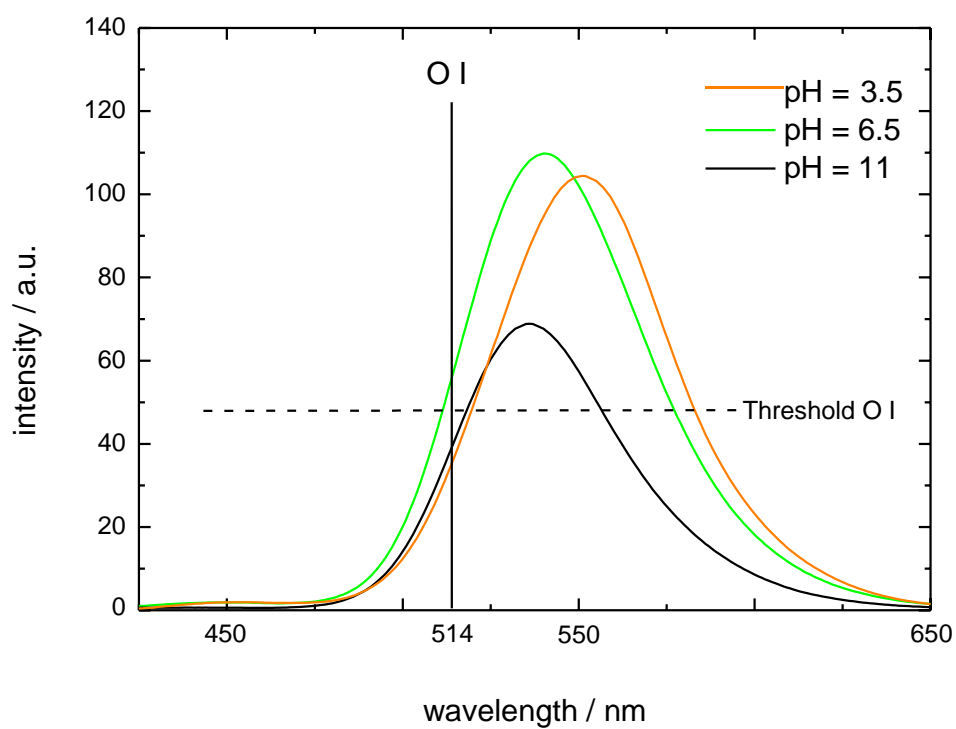

Figure S98: Fluorescence emission of **4** at different pH values with corresponding output channel and threshold level for XNOR gate.

Acid and base as input, Initial state: pH = 3.5

### INHIB 1 gate

Table S27: Truth table for INHIB 1 gate.

| In I (OH <sup>-</sup> ) | In II (H <sup>+</sup> ) | O V<br>( $\lambda = 482$ nm) |
|-------------------------|-------------------------|------------------------------|
| 0                       | 0                       | 0                            |
| 1                       | 0                       | 0                            |
| 0                       | 1                       | 1                            |
| 1                       | 1                       | 0                            |

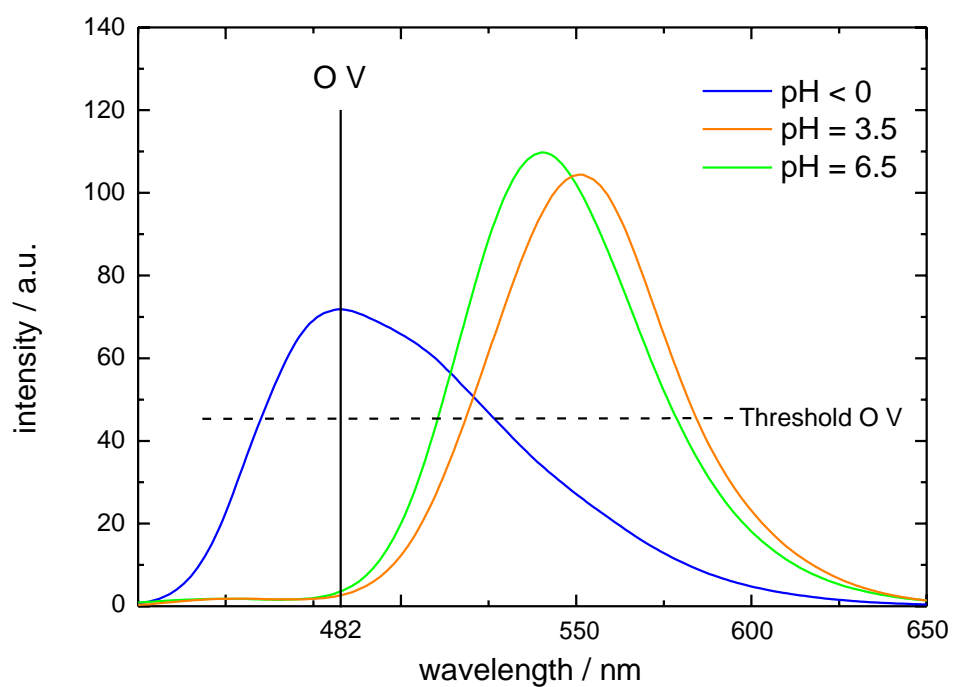

Figure S99: Fluorescence emission of **4** at different pH values with corresponding output channel and threshold level for INHIB 1 gate.

## INHIB 2 gate

Table S28: Truth table for INHIB 2 gate.

| In I (OH <sup>-</sup> ) | In II (H <sup>+</sup> ) | O IV<br>( $\lambda = 524$ nm) |
|-------------------------|-------------------------|-------------------------------|
| 0                       | 0                       | 0                             |
| 1                       | 0                       | 1                             |
| 0                       | 1                       | 0                             |
| 1                       | 1                       | 0                             |

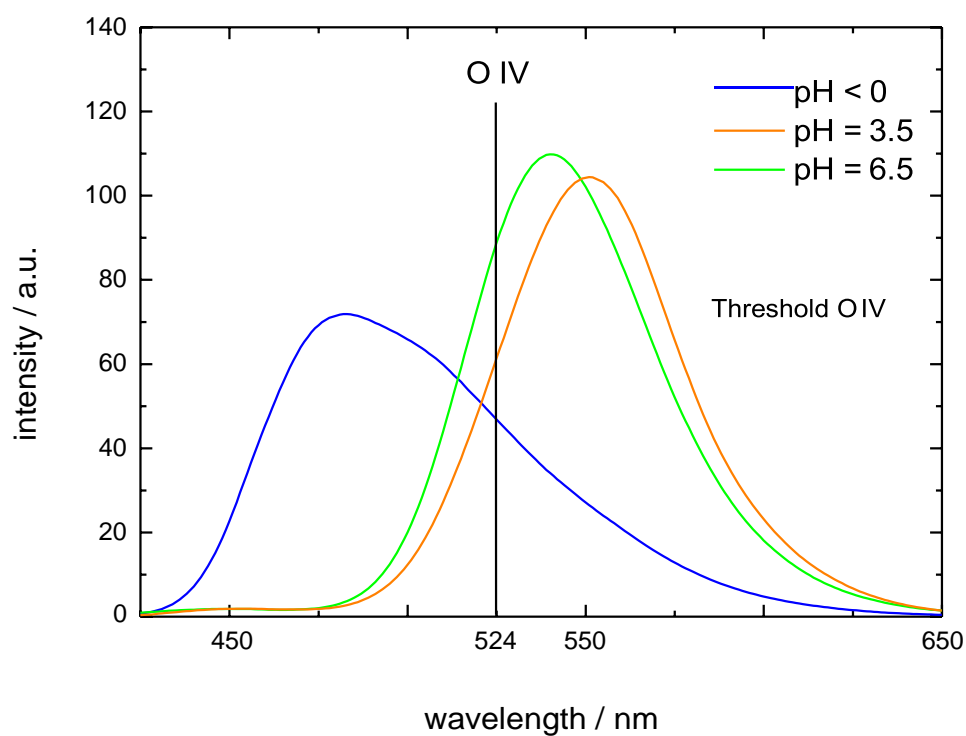

Figure S100: Fluorescence emission of **4** at different pH values with corresponding output channel and threshold level for INHIB 1 gate.

Further different INHIB gates possible by choosing different initial states and output wavelength.

Acid and base as input, Initial state: pH = 7

**IMP** gate

Table S29: Truth table for  $\text{OH}^-$  IMP  $\text{H}^+$  gate.

| In I ( $\text{OH}^-$ ) | In II ( $\text{H}^+$ ) | O II<br>( $\lambda = 548 \text{ nm}$ ) |
|------------------------|------------------------|----------------------------------------|
| 0                      | 0                      | 1                                      |
| 1                      | 0                      | 0                                      |
| 0                      | 1                      | 1                                      |
| 1                      | 1                      | 1                                      |

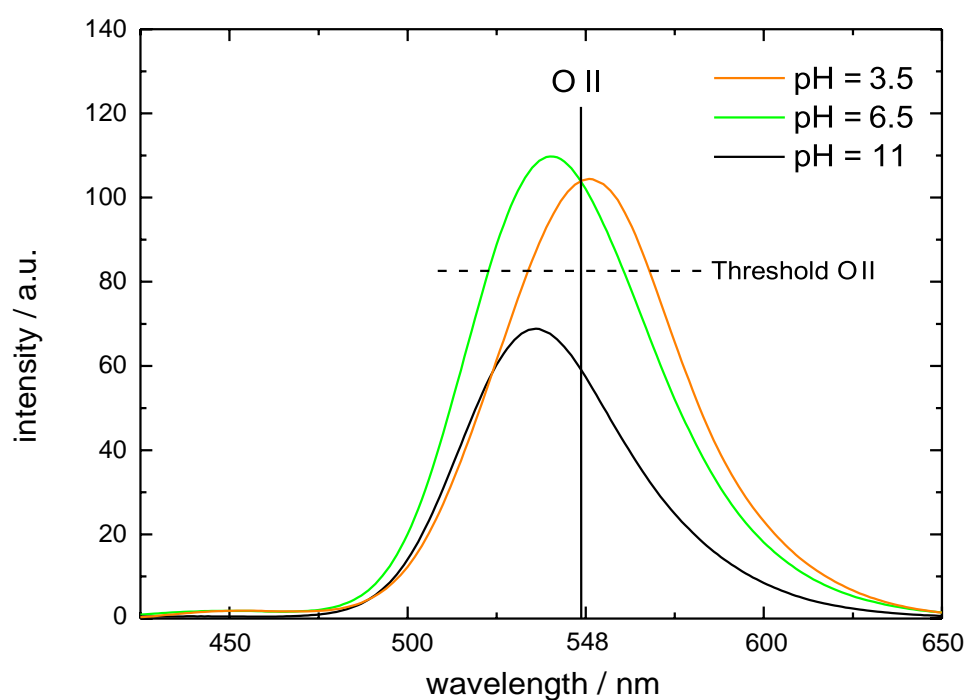

Figure S101: Fluorescence emission of **4** at different pH values with corresponding output channel and threshold level for  $\text{OH}^-$  IMP  $\text{H}^+$  gate.

Acid and base as input, Initial state: pH = 3.5

**NIMP** gate

Table S30: Truth table for OH<sup>-</sup> NIMP H<sup>+</sup> gate.

| In I (OH <sup>-</sup> ) | In II (H <sup>+</sup> ) | O IV<br>( $\lambda = 524$ nm) |
|-------------------------|-------------------------|-------------------------------|
| 0                       | 0                       | 0                             |
| 1                       | 0                       | 1                             |
| 0                       | 1                       | 0                             |
| 1                       | 1                       | 0                             |

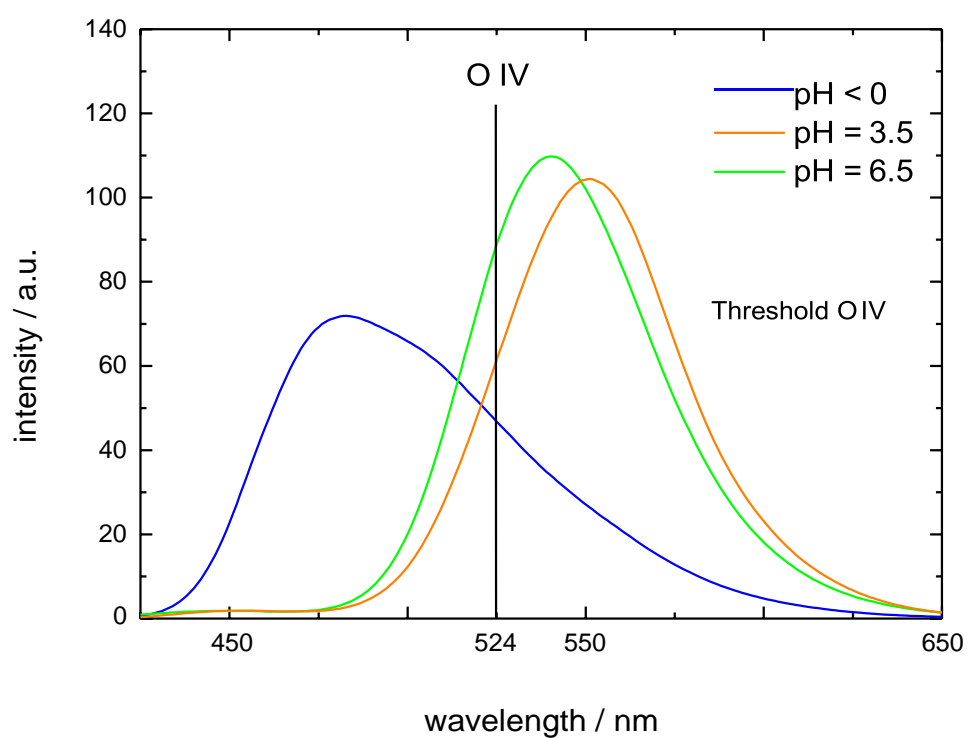

Figure S102: Fluorescence emission of **4** at different pH values with corresponding output channel and threshold level for OH<sup>-</sup> NIMP H<sup>+</sup> gate.



Acid and base as input, Initial state: pH = 3.5

## Comparator

Table S31: Truth table for comparator.

| In I (OH <sup>-</sup> ) | In II (H <sup>+</sup> ) | O III<br>In I = In II<br>( $\lambda = 569$ nm) | O IV<br>In I > In II<br>( $\lambda = 524$ nm) | O V<br>In I < In II<br>( $\lambda = 482$ nm) |
|-------------------------|-------------------------|------------------------------------------------|-----------------------------------------------|----------------------------------------------|
|                         |                         |                                                |                                               |                                              |
| 0                       | 0                       | 1                                              | 0                                             | 0                                            |
| 1                       | 0                       | 0                                              | 1                                             | 0                                            |
| 0                       | 1                       | 0                                              | 0                                             | 1                                            |
| 1                       | 1                       | 1                                              | 0                                             | 0                                            |

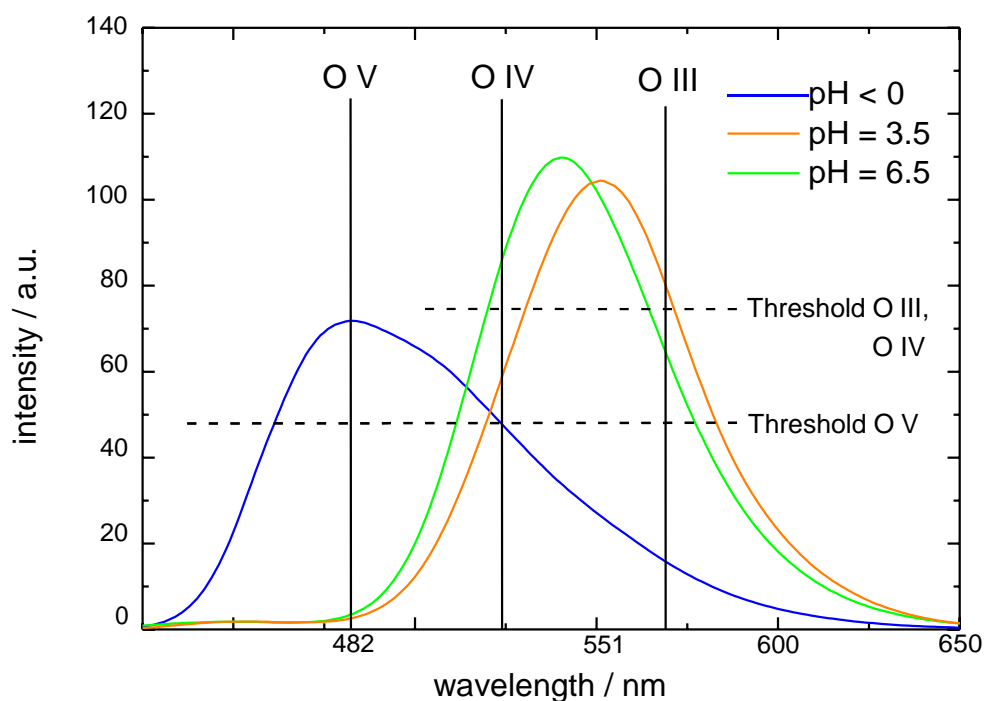

Figure S103: Fluorescence emission of **4** at different pH values with corresponding output channels and threshold levels for comparator.

base as input, Initial state: pH < 0

### Half-adder

Table S32: Truth table for molecular half-adder.

| In I (OH <sup>-</sup> ) | In II (OH <sup>-</sup> ) | O IV<br>( $\lambda = 524$ nm) | O III<br>( $\lambda = 569$ nm) |
|-------------------------|--------------------------|-------------------------------|--------------------------------|
| 0                       | 0                        | 0                             | 0                              |
| 1                       | 0                        | 0                             | 1                              |
| 0                       | 1                        | 0                             | 1                              |
| 1                       | 1                        | 1                             | 0                              |

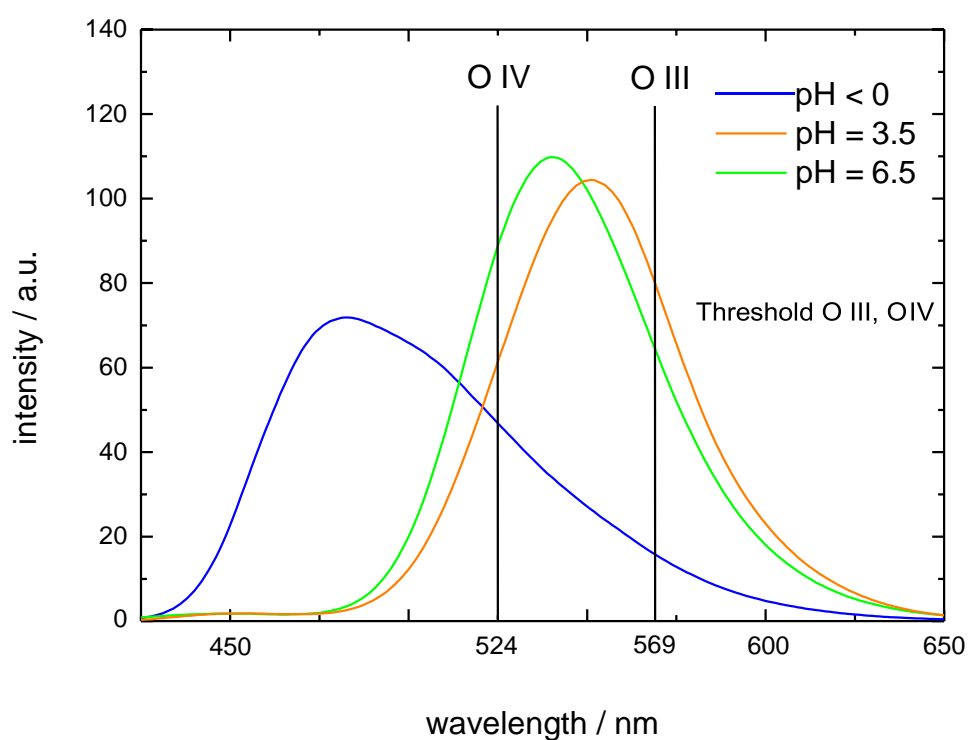

Figure S104: Fluorescence emission of **4** at different pH values with corresponding output channels and threshold levels for half-adder.

## Half-subtractor

Table S33: Truth table for molecular half-subtractor.

| In I (OH <sup>-</sup> ,<br>high amount) | In II (OH <sup>-</sup> ,<br>low amount) | O III<br>( $\lambda = 569$ nm) | O II<br>( $\lambda = 548$ nm) |
|-----------------------------------------|-----------------------------------------|--------------------------------|-------------------------------|
| 0                                       | 0                                       | 0                              | 0                             |
| 1                                       | 0                                       | 0                              | 1                             |
| 0                                       | 1                                       | 1                              | 1                             |
| 1                                       | 1                                       | 0                              | 0                             |

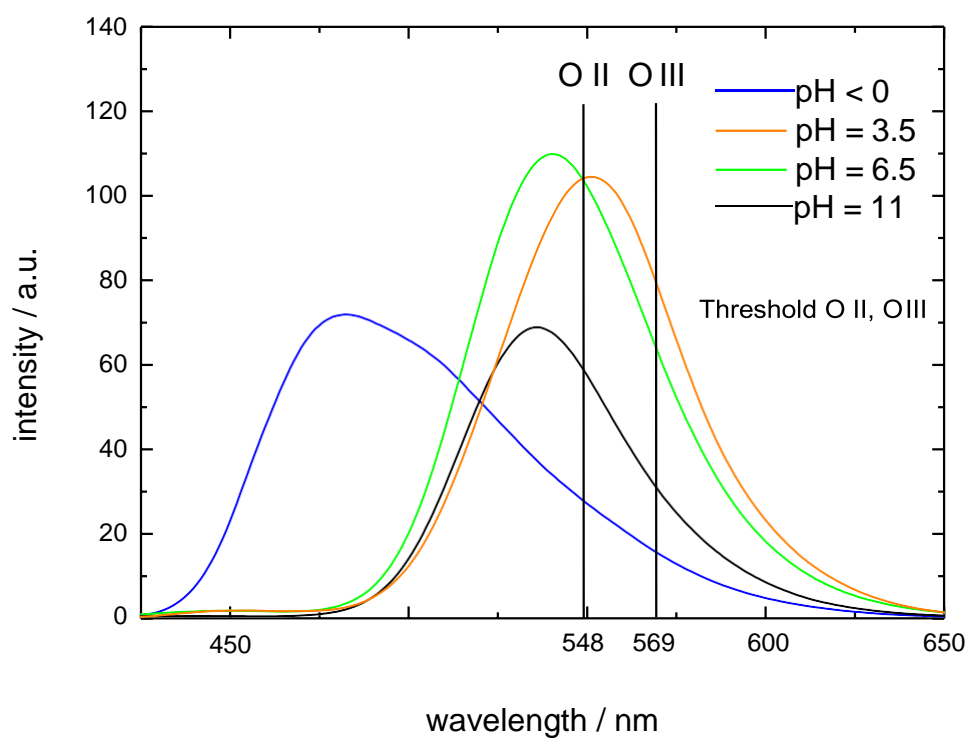

Figure S105: Fluorescence emission of **4** at different pH values with corresponding output channels and threshold levels for half-subtractor.

## Supporting References

1. E. Pines, *The Chemistry of Phenols*, John Wiley & Sons Ltd, 2003.
2. B. Finkler, C. Spies, M. Vester, F. Walte, K. Omlor, I. Riemann, M. Zimmer, F. Stracke, M. Gerhards, and G. Jung, *Photochem. Photobiol. Sci.*, 2014, **13**, 548–562.
3. E. Pines, D. Pines, Y.-Z. Ma, and G. R. Fleming, *ChemPhysChem*, 2004, **5**, 1315–1327.
4. D. B. Spry and M. D. Fayer, *J. Chem. Phys.*, 2007, **127**, 204501 1–10.
5. D. B. Spry and M. D. Fayer, *J. Chem. Phys.*, 2008, **128**, 084508 1–9.
6. D. B. Spry and M. D. Fayer, *J. Phys. Chem. B*, 2009, **113**, 10210–10221.
7. A. Weller, *Discuss. Faraday Soc.*, 1959, **27**, 28–33.
8. A. Weller, *Prograss React. Kinet.*, 1961, **1**, 187–214.
9. J. Widengren, B. Terry, and R. Rigler, *Chem. Phys.*, 1999, **249**, 259–271.
10. B. Hinkeldey, A. Schmitt, and G. Jung, *ChemPhysChem*, 2008, **9**, 2019–2027.
11. C. Hansch, A. Leo, and R. W. Taft, *Chem. Rev.*, 1991, **91**, 165–195.
